# Supplementary material for: Construction of lncRNA prognostic model related to cuproptosis in esophageal carcinoma
Source: Front Genet. 2023 Apr 13;14:1120827. doi: 10.3389/fgene.2023.1120827 (PMC10133708; doi:10.3389/fgene.2023.1120827)
Supplement: Supplementary file 1 [file Table1.XLSX]

## Sheet: Sheet1
ID	TCGA-L5-A4OQ-11A-12R-A260-31	TCGA-L5-A43C-11A-11R-A24K-31	TCGA-L5-A4OJ-11A-12R-A260-31	TCGA-L5-A4OO-11A-12R-A260-31	TCGA-IC-A6RE-11A-12R-A336-31	TCGA-V5-A7RE-11A-11R-A354-31	TCGA-IC-A6RF-11A-21R-A336-31	TCGA-L5-A4OG-11A-12R-A260-31	TCGA-L5-A4OR-11A-11R-A260-31	TCGA-V5-AASX-11A-11R-A38D-31	TCGA-L5-A4OF-11A-12R-A260-31	TCGA-R6-A6L4-01A-11R-A31P-31	TCGA-L5-A4OO-01A-11R-A260-31	TCGA-L5-A88Z-01A-11R-A36D-31	TCGA-2H-A9GR-01A-12R-A37I-31	TCGA-Z6-A8JD-01A-11R-A36D-31	TCGA-L5-A891-01A-11R-A36D-31	TCGA-IG-A4QS-01A-11R-A260-31	TCGA-IG-A3QL-01A-11R-A24K-31	TCGA-KH-A6WC-01A-11R-A336-31	TCGA-V5-AASV-01A-11R-A38D-31	TCGA-IG-A4P3-01A-11R-A260-31	TCGA-2H-A9GG-01A-11R-A37I-31	TCGA-IG-A5S3-01A-11R-A28J-31	TCGA-L5-A4OX-01A-21R-A28J-31	TCGA-2H-A9GJ-01A-11R-A37I-31	TCGA-JY-A6FB-01A-11R-A336-31	TCGA-L5-A4OU-01A-11R-A28J-31	TCGA-L5-A88W-01A-11R-A354-31	TCGA-LN-A49P-01A-11R-A24K-31	TCGA-2H-A9GQ-01A-11R-A37I-31	TCGA-LN-A7HY-01A-12R-A354-31	TCGA-L7-A6VZ-01A-12R-A336-31	TCGA-L7-A56G-01A-21R-A260-31	TCGA-L5-A4ON-01A-11R-A260-31	TCGA-VR-A8EO-01A-11R-A36D-31	TCGA-S8-A6BW-01A-11R-A31P-31	TCGA-VR-A8ER-01A-11R-A36D-31	TCGA-LN-A8I1-01A-11R-A36D-31	TCGA-IG-A3YC-01A-11R-A24K-31	TCGA-L5-A8NE-01A-11R-A37I-31	TCGA-V5-A7RC-06A-11R-A406-31	TCGA-L5-A88V-01A-11R-A354-31	TCGA-2H-A9GF-01A-11R-A37I-31	TCGA-JY-A93C-01A-11R-A38D-31	TCGA-IG-A7DP-01A-31R-A336-31	TCGA-M9-A5M8-01A-11R-A28J-31	TCGA-R6-A6KZ-01A-11R-A31P-31	TCGA-2H-A9GK-01A-11R-A37I-31
DIRC3	0.6405	0.1886	1.1317	0.6591	0.1388	0.2985	0.2857	0.369	0.2323	0.0102	0.1364	0	0.1047	0.289	0.0983	0.2739	0.0058	0.024	1.9972	0.0863	0.0295	0.4982	0.0997	0.4222	0.0629	0.0106	0.0331	0.1214	0.0918	0.1982	0.0943	0.2407	0	0.0593	0.04	0.3248	0.505	0.0519	0.0813	0.2083	0.0129	1.4546	0.0156	0.2425	0.0541	0.1555	0.0371	0.0941	0.0549
AC017028.2	0.1591	0.0871	0.0334	0.1391	0.0149	0.43	0.1759	0.0779	0.0238	0.063	0.0438	0.3365	0.0595	0.1493	0.143	0.2249	0.3692	0.1417	0.3088	0.1317	0.247	0.2583	0.7367	0.2253	0.5359	0.0783	0.068	0.1259	0.1076	0.2024	0.1429	0.0304	0.1259	0.0266	0.1532	0.1391	0.0854	0.0799	0.1431	0.0558	0.3709	0.6734	0.2944	0.3369	0.1575	0.1135	0.2286	0.2319	0.1353
AL096701.4	0.509	0.3345	0.3853	0.2968	0.2283	0.7457	0.743	0.6481	0.2746	0.9194	0.3365	0.646	1.066	0.5731	0.5491	1.3913	1.1996	1.0431	3.4727	0.8555	0.7253	0.5951	2.5007	1.1977	1.2804	1.3522	0.9404	1.3895	1.1987	1.3714	12.8269	2.6267	0.2417	0.7137	0.8822	1.0015	1.6386	1.2277	4.8341	1.4129	0.3662	2.1203	3.8831	1.3526	1.1165	0.7083	0.5267	1.9474	0.3636
HOTTIP	0.0524	0	0.0294	0.0102	0	5.8057	0.0116	0.0086	0.0157	12.8828	0.0096	1.2474	0.3006	0.0227	1.8053	0.2553	0	1.4868	0.0218	0.02	0.0192	0.0341	0.5629	0.1942	11.8993	9.9027	0.0986	0.5496	0	0.102	0.0824	0.2304	1.7673	0.0175	21.3719	0.2177	0.217	0.0105	0.0471	0.0367	0.7892	0.0355	7.4583	16.7865	21.9348	0.0281	5.5827	0.4202	0.6686
AL121904.1	0	0	0	0	0	0	0	0	0	0	0	0	0	0	0.0273	0.3098	0	0	0	0	0	0.032	0	0.0859	0.0295	0.0647	0	0	0	0	0.3543	0.1131	0	0	0	0.1293	0	0	0.2483	0	8.8803	0.0334	0	0	0	0	0.0283	5.5688	0
AC091588.1	0.6189	2.1689	6.975	7.5065	0	3.1086	0	13.214	3.5613	10.0023	11.4547	1.1781	2.7773	0	1.6435	0.1167	0.3978	1.3234	0	0	0.1357	1.206	1.1963	0.3236	8.4512	6.3327	5.3358	2.9382	0.1005	0.1112	0.1668	0	0	0	5.6184	0.1624	0	0	0.4008	0.1041	4.7494	0.1258	1.0758	0.572	5.6562	1.4574	1.7078	1.759	2.1471
SNHG32	22.7004	5.8904	10.3343	10.3014	8.9653	21.8688	16.305	7.2737	4.7474	7.5998	7.3392	12.0028	11.4783	27.4164	28.7059	26.6504	47.761	13.0138	26.6866	6.616	18.3892	20.7468	27.1051	89.6338	18.7301	59.3531	9.3193	11.9481	19.0338	75.7142	44.82	13.3834	42.5501	17.9884	20.1384	39.2253	10.8251	21.2454	20.0773	15.7941	50.8462	46.5	28.1862	29.7313	18.6485	14.7101	4.9147	17.0455	11.1781
CAPN10-DT	1.0332	0.5961	1.1399	0.9587	0.9842	2.232	0.6929	1.2186	0.5094	1.806	0.9301	2.2792	3.0244	0.9621	2.1388	0.8167	1.8446	2.4151	1.0444	0.8572	0.9741	1.3314	2.6931	6.2446	3.1438	2.4264	2.041	1.9514	0.9472	2.3246	5.1498	1.4778	2.5108	0.9568	1.0818	2.0692	0.8583	1.2594	2.3978	0.9064	1.6695	3.4198	4.2052	1.5145	3.0966	0.8205	1.0921	4.7603	1.6663
AL109615.3	0.4455	0.185	0.323	1.1465	0.0345	0.5304	0.2854	0.2708	0.9805	0.6425	0.1523	1.1858	0.7582	0.6385	0.7393	2.9099	3.439	0.6158	0.115	0.0469	0.2357	0.9429	1.2124	1.5059	2.1941	1.1183	2.2859	1.4038	0.5738	1.8622	2.339	2.607	2.5964	0.523	12.3467	1.2492	0.6216	1.9635	1.9063	0.5556	3.659	4.7909	7.0455	7.5242	1.0388	0.4603	2.3444	2.8208	3.2286
PPP1R26-AS1	0.8603	0.4536	0.7414	0.6689	0.4645	3.0896	0.5074	1.2378	0.3629	2.3828	0.7839	2.0329	3.5904	1.0394	2.9613	0.6006	0.4892	1.883	0.7776	0.43	1.3503	2.1731	6.6206	3.2349	4.055	0.93	1.9839	2.332	0.4226	6.1138	7.2419	0.9744	2.4811	0.5637	0.4996	1.4488	1.9635	2.9331	2.0402	0.3931	1.8083	4.8556	2.123	2.9448	5.4453	1.8984	0.7968	5.1894	0.6719
AC026254.2	0.2707	0.0988	0.1138	0.2105	0.1518	1.133	0	0.0442	0.0811	0.3431	0	0	0.3374	0.5079	0.8985	0.085	0.7732	0.0804	1.3137	0.2412	0.7417	0.4835	1.4534	0.9436	0.8106	0.4439	0.5556	0.3213	0.2931	0.8103	3.526	1.4486	0.6855	0.1807	0.2978	0.8285	0.6224	1.5234	0.8764	0.7969	0.1803	2.2917	0.6535	0.5212	1.072	0.5795	0.5446	1.6767	0.2762
AC013652.1	0.0381	0.0835	0.3152	0.0889	0.0641	1.7946	0.4636	0.0871	0.0571	1.1352	0.084	0.4635	0.4418	1.5568	0.0896	0.6406	1.4017	0.0283	2.0293	0.296	3.2511	1.2006	0.3888	3.6036	0.3253	3.0496	0.0848	0.2262	0.2734	2.0307	0.3167	1.5588	0.6997	0.7633	0.3198	2.4745	3.1198	0.9422	0.3496	0.6839	0.0457	3.1233	0.1963	1.6658	0.2961	0.136	0.2848	1.1803	0.4407
LINC00898	0	0	0.12	0	0.01	0.1586	0.0946	0	0	0	0	0	0.08	0.1467	0	1.2182	0.1719	0.0079	0.8158	0	0.0977	0.4169	0	1.7945	0.016	0.3333	0	0	0.0579	0.1121	0.5646	0.3782	0	0.0803	0.0074	0.6431	0.4345	0.0108	0.4233	0.1875	0.0998	1.9834	0	0.1648	0.0326	0	0.0154	0.2339	0
AC010894.1	1.2221	0.7908	0.4205	0.7126	0.6229	3.255	0.4422	0.5984	0.1998	2.6403	0.3672	1.821	1.0386	2.7421	2.0281	3.7694	4.9983	0.6928	3.5585	0.5092	1.6438	1.5695	2.5052	4.6472	1.1477	4.372	2.2804	1.3845	1.2629	2.7436	2.6198	4.3952	2.9539	1.1125	1.7419	6.4845	2.6056	5.9618	7.2534	1.5886	1.8205	2.6524	6.8657	2.3102	1.0661	1.1296	2.7302	6.2539	1.8137
RHOQ-AS1	2.7207	0.4165	0.246	0.9553	0.2625	0.9796	0.7376	1.0028	0.2893	0.1947	0.7413	0.1856	1.641	2.2042	0.7283	1.2408	0.4701	0.9383	0.4624	0.2682	3.2063	1.7387	0.5419	1.262	1.8659	0.4317	1.0809	1.3888	0.4038	1.3399	1.9711	1.4425	0.3889	0.3809	1.1106	2.1489	1.9104	0.9878	2.0837	0.6152	0.304	1.6941	0.3672	0.9463	0.7753	1.5656	0.3279	1.5669	2.2089
AC025470.2	0.3692	0.1489	0.8661	0.6118	0.0218	0.2847	0	0.1142	0.0524	0.0554	0.1284	0	0.0872	0	0.0645	0.0183	0	0	0.0485	0	0	0.4165	0.1252	14.3763	0	0.0382	0	0.1384	0.0158	0.0872	0.0262	0	0.1476	0.0389	0.0641	2.2683	0.0357	0.0234	0	0.049	0.0621	0.0395	0.0375	0.0224	0.071	0.104	0.1005	0.1274	0.0595
AP000254.2	6.9221	4.8664	5.1748	3.7871	1.0542	2.5933	6.577	5.4402	3.0733	4.1432	3.5775	4.8801	9.6511	6.957	7.0205	8.6987	3.9364	5.7103	7.1809	2.2849	8.3359	6.4112	10.8744	17.5385	18.8088	5.1287	4.9994	6.0856	2.8451	5.2186	20.498	4.9979	2.5968	4.7069	21.1573	6.3892	7.467	2.9886	10.9747	5.9662	8.7437	10.0711	1.9805	1.7771	8.4348	8.5066	6.1161	8.9675	4.1854
AL021392.1	0.1507	0.0825	0.3295	0.123	0.6591	0.6465	1.1997	0.3985	0.0948	0.4298	0.3818	1.0039	0.4508	1.9184	0.4752	3.7636	0.9524	0.0269	2.0435	0.9209	1.2056	5.1239	4.5267	0.3546	0.2572	1.868	0.1392	0.6438	0.4527	2.3546	1.0559	0.6221	0.3148	0.166	0.286	0.672	4.0886	1.1812	2.1303	1.3942	0.4818	1.5003	1.0913	0.1567	0.1377	0.3387	0.2079	2.2072	0.1076
CCDC28A-AS1	0.3118	0.1301	0.2997	0.2597	0.1665	1.4138	0.1576	0.2763	0.0934	0.9033	0.229	0.5652	0.5108	0.5143	0.7762	0.5877	1.1133	0.7937	0.9882	0.3062	0.3417	1.2585	0.2989	1.4362	0.7603	0.5989	0.701	0.4405	0.3014	0.52	2.801	1.1918	1.2266	0.8029	0.5391	1.9864	0.2458	0.7699	2.7559	0.3122	0.8545	0.7693	0.9319	0.1544	1.2076	0.1271	0.2304	2.0936	0.2878
AC114284.1	0.8776	0.1311	0.2348	0.1396	0.0447	0.3339	0	0.5469	0.1435	0.2655	0.4834	0.1687	0.6265	0.4837	0.7282	0.6391	0.2564	0.1422	0.2655	0.0305	0	0.6219	0.8353	0.0521	0.2867	0.3532	0.9417	0.1894	0.2267	0.1075	0.8601	0.4117	0.4924	0.3995	1.2839	0.3663	0.2568	0.0481	0.2583	0.8724	0.5102	0	0.4237	0.8756	1.276	0.7685	0.3784	0.436	0.9768
AC093249.2	0.1844	0	0.6203	0.215	0.6203	4.8237	0.367	0.0903	0.3316	0.7012	0.3047	0.0975	0.2069	0.1597	0.6885	0.6083	0.7901	1.4785	0.767	0.1409	2.122	0.9881	1.485	3.0129	0.9111	1.0885	0.3785	1.4225	0	1.9871	0.6212	0.5286	2.714	0.7386	0.6848	1.4511	0.5936	0	0.199	0.853	1.0317	0.9366	1.0683	0.9586	1.2639	0.4934	0.8745	2.3179	0.4703
AC004943.3	0.1481	0.2433	0.1246	0.0864	0	0.155	0	0.1451	0	0.2816	0.0816	0.3916	0.1108	0	0.1229	0.2792	0.1587	0.3299	0.1849	0.0566	0.3247	0.2886	0.4772	0.3873	0.8649	0.0729	0.076	0.6153	0.0601	0.1995	1.0978	0.7644	0.1407	0	0.489	1.2629	0.3406	0.0893	0.5595	0.1869	0.2368	0.4515	0	0.0856	0.2031	0	0.2555	0.6477	0.1511
AL157392.2	1.5	2.772	1.3404	1.4213	0.3154	1.1772	0.2488	1.6527	1.5172	1.6934	0.3098	0	0.8414	0.0812	0.0778	0.1767	0	0.1671	0.078	0	0.1028	0.274	0.151	0.9804	0	0	0	0.4451	0	0.3368	0.1263	0.3225	0	1.3144	0.4642	3.8121	0.6036	0.4522	0.2023	0.2366	0.2248	0.6667	0.0905	0.1083	0.3427	1.2041	0.1617	1.8446	0.6696
GORAB-AS1	0.1259	0.0086	0.0529	0.0275	0.0176	0.5764	0.0418	0.0925	0.0142	0.1496	0.0347	0.0832	0.2354	0.259	0.0457	0.7862	0.118	0.0631	0.4845	0.024	0.1121	0.7744	0.1521	0.4938	0.0778	0.0929	0.1131	0.2242	0.0831	0.2897	0.6044	0.6678	0.0971	0.1655	0.2208	0.6503	1.2666	0.3227	0.3906	0.278	0.1321	0.3198	0.114	0.2	0.2661	0.1348	0.0679	0.1548	0.1044
AC138207.2	1.1742	0.3956	0.2279	0.632	0	1.4177	0.5993	0.3538	0.1624	1.0304	0.2985	0.2865	0.2027	1.5645	0.9743	1.362	0	0.8047	3.1561	0.138	1.4849	1.056	1.8186	3.424	0.4057	1.1552	1.2051	0.6432	0.3667	0.5678	1.5822	4.2466	0.5146	0.1809	0.4472	3.9095	1.4123	1.416	1.7545	0.3799	1.2996	3.1199	0.8722	0.4174	0.9905	0.6767	0.3115	2.4682	0.6451
AC009118.2	0	0	0	0	0	0	0.09	0	0	0	0	0	0	0	0.0563	0.1279	0	0	0.1693	0	1.4128	0.0661	0	0.1774	0	0	0	0	0.1653	0	0	0	0	0.1359	0	0.178	1.56	0.7363	0	0.1712	0	2.2056	0.0655	0	0	0	0	0	0
AL136419.3	0.3371	0.0527	0.1485	0.2434	0.072	0.5376	0.2343	0.173	0.0866	0.29	0.1945	0.1868	0.1201	0.9176	0.2132	0.2724	0.1548	0.1716	0.4541	0.0491	0.2287	0.4067	0.8146	1.3011	0.4327	0.695	0.2801	0.1334	0.0261	0.5767	0.649	0.5155	0.5031	1.0772	0.9009	0.2738	1.5504	0.6776	0.2945	0.3916	0.1668	1.5168	0.248	0.4637	0.6162	0.3265	0.0415	0.8072	0.2949
AC027584.1	0	0	0.0457	0.0317	0	0.256	0	0	0	0	0.0299	0	0.1016	1.6948	0	0.333	0.5532	0	0.9271	0.0208	2.9491	1.1652	0.0219	0.8527	0.0488	0	0.1395	0	0.9711	0.7322	1.172	0.1558	0	0	0	0.8913	3.5748	0.5572	0.2053	0.4572	0.3042	1.4082	0	0	0.0248	0	0.0703	6.2983	0.0832
AC004990.1	0.058	0.0212	0	0	0.9759	2.8329	9.0066	0.0758	0	0.1654	0.1065	0.4499	3.3264	19.4605	0.0481	0.1458	0.0621	1.7401	9.2508	0.842	3.5818	4.0131	0.0311	0.2275	0.0695	1.8264	0.0992	0.6426	0.0157	12.3124	0.0521	0	1.7261	0.1356	2.1704	0.0761	2.6501	3.7545	10.8309	0.732	0.2473	10.5695	0.1681	0.4468	0.8483	0	0.8171	1.2683	2.8413
AC006206.2	0.2216	0	3.6115	0	2.4234	0.2029	0.8823	0.0271	0.0249	0	0.3662	0.4688	2.5072	1.0797	0.1379	7.5462	0.2374	0.074	9.2889	1.1005	5.9818	18.5981	1.9858	39.5834	0	5.3423	0	0.5261	0.7199	3.1348	6.7573	1.5885	0	7.4077	0.16	8.9757	10.0907	4.4769	3.8569	4.7306	1.0187	13.9042	0	3.5207	2.9623	0	0.0956	6.6926	0.5936
AC092807.2	0.5486	0	0.1538	0	0	0.1914	0	0	0	0.3477	0	0.3868	0.6839	0.1584	0.1518	1.3789	0.1959	0	0	0	0	0.3564	0.5891	1.9124	0.3286	0.5398	0	1.0852	0	0.6569	4.4357	2.0971	0.3473	0.1831	0.6037	2.6385	1.0092	0.4411	0.9868	0.6153	0	0.3716	0	0.2113	0.1671	0.1957	0	0.1999	0
AC068831.5	0	0.3356	0.4296	0	0.9165	2.2448	2.3044	0.1	1.0103	0.2913	0	0.4321	0.1528	1.8579	0.7629	1.6368	0.5472	0.4551	3.3997	1.4047	1.0077	1.0949	0.2468	0.8012	0.0918	0.201	0	0.7275	2.1567	2.477	0.9636	6.4431	0.7761	1.3299	0.0843	0.938	4.8859	2.3407	0.882	1.5467	0.4083	3.0098	0.4932	0	0.3734	0.7654	0.0881	0.67	0.7296
AC100823.1	4.0735	0.7097	4.1267	5.6142	0	0.0969	0.2457	2.4481	1.0821	0	1.6318	1.2727	0.3462	0.2405	0	0.0873	3.471	0.0825	0.9243	0.0707	0	0.0902	0.9693	14.7644	0.2495	0.0911	0	0.2198	0	0.582	0	0	1.055	3.8012	0	0.6072	0.3406	0	0.0999	0.0779	0.148	2.2573	0.1788	0.107	0.9307	0	0.0798	0.3036	0
LINC01980	0.0094	0.0103	0.1497	0	0.0315	0.4511	0	0.0734	0.0084	0.4098	0.031	0.0595	0.0981	4.3826	0.0622	2.3317	10.0887	0	6.822	0.3293	7.0253	7.0578	0.234	4.2997	0.0084	0.9035	0	2.8695	9.2911	2.6257	4.9123	12.9493	0.2581	1.098	0.0387	7.2153	1.991	4.6786	6.7556	3.3816	1.7229	7.7497	0.0271	1.1368	0.3254	0.01	0	8.1947	0
AL109614.1	0.8485	0.9291	2.2299	0.8658	1.3083	5.216	1.1259	1.2464	0.6675	3.3272	0.5842	3.9255	2.1417	1.3778	2.4642	1.8992	0.3408	2.2677	0.5294	1.3773	3.3709	1.86	2.3062	27.3117	3.0488	5.2172	2.5036	2.7692	0.3445	4.1907	1.4292	0.8513	6.9492	1.2745	23.3689	0.2782	2.2436	2.558	1.7168	1.695	1.9499	5.8184	2.2531	1.4703	7.4633	0.1135	1.0974	3.246	2.1643
CALML3-AS1	0.1738	0.0423	0.3208	0.1013	9.4093	0.1869	3.4528	0.0851	0.0911	0.0092	0.2446	5.4319	0.1553	6.6435	0.1322	3.0621	2.2599	0.3441	1.2009	10.5843	1.6296	9.8258	0.2449	5.282	0.0867	0.1995	0.0595	0.063	4.7589	7.6605	0.039	1.5944	0.0596	9.7318	0.1912	0.8358	7.0289	4.215	2.9279	10.9354	0.0386	3.0163	0.662	15.2147	0.0794	0.062	0.2789	0.0369	0.0345
MAP4K3-DT	3.0345	1.9953	3.9362	3.9498	0.9881	3.0019	1.2627	3.3584	3.3651	2.4424	3.8243	2.6275	1.0306	1.3796	2.9947	1.2423	2.0386	2.2419	1.9088	0.9611	1.1318	2.0671	2.6	1.0872	2.8716	1.7337	1.9243	2.2169	0.8614	1.3419	2.1561	0.8123	2.2858	0.847	4.8862	1.2712	1.2512	1.1093	0.8634	0.8804	1.8847	1.8869	2.3176	3.4283	2.8344	1.1769	1.8811	1.9724	1.6254
NFE2L1-DT	0.4091	0.1327	0.4587	0.318	0.1359	1.3635	0.2413	0.46	0.1498	0.4033	0.1502	0.5448	0.7932	0.1443	0.352	0.614	0.422	0.1755	0.6933	0.3935	1.0129	0.5905	0.5979	2.139	0.6805	0.2832	0.3888	0.5934	0.0615	0.5034	1.7558	1.1988	0.5467	0.2276	0.1625	0.2782	0.5017	0.402	0.5396	0.6372	0.5813	1.5393	1.0095	0.7877	0.8862	0.3892	0.3789	2.1033	0.3401
AC096642.1	0.272	0.0372	0.3288	0.2776	0.1525	0.6404	0.1128	0.1831	0.0611	0.6141	0.2247	0.4494	0.8773	0.7656	0.4937	0.0961	0.4006	0.4544	0.2687	0.4156	0.7267	1.4079	1.9442	1.8445	0.5956	0.2007	0.3664	0.1412	0.069	0.2901	3.1155	0.3119	0.5489	0.2213	1.6695	0.5129	0.7193	0.3075	1.963	0.7722	0.3261	1.209	0.3119	0.0982	0.5904	0.3093	0.3811	1.8582	0.0694
UICLM	0.1339	0.4764	0.9991	0.2927	0.0188	0.5077	0.0666	0.4588	0.3009	0.0159	0.2949	0.0531	0.3629	0.0145	0.2777	0.0946	6.9002	0.0894	0.0139	0	0.0367	0.0978	1.4822	1.3341	0.1202	0.0494	0.0343	0.1191	0	0.0301	0.2029	0.0192	0.0636	0.1843	0.1243	0.1536	0	0	0.8847	0.0141	2.2468	0.5269	0.2423	0.5219	0	0.0358	1.2119	0.4206	0.0512
AC128709.2	0	0	0	0	0.0893	1.3333	0.4227	0	0.0716	0.3028	0.0877	0.2527	0.0596	0	0.1983	1.2009	0.5119	0	2.054	0.6084	0.5237	3.2589	0.5772	0.2082	0.0715	0.2351	0	0	0	6.3651	0	0	0.0756	0	0.1972	0	43.2894	1.4406	0.4297	0	0	4.6117	0.0769	0.276	0.2183	0	0	0.4353	0
AC004812.2	2.7588	0.6042	1.4992	1.7571	1.6659	2.5093	3.0413	2.3486	0.4198	1.2105	0.7247	1.3241	2.3014	4.2823	1.8667	3.2202	1.8414	4.1028	7.9451	1.9454	3.4888	4.28	4.8881	5.9643	2.9168	2.1714	4.7264	2.6194	4.0495	5.3743	5.8052	6.4003	2.0354	1.0626	1.5061	4.064	2.7326	3.2502	13.1228	3.5701	1.4419	2.3285	4.6517	7.1099	2.4825	3.657	2.5802	3.0388	2.5334
COX10-AS1	2.5106	0.8289	1.5915	1.2323	2.4247	3.6388	3.0828	1.89	0.9534	1.9664	2.0888	2.4767	1.7964	2.9045	1.7351	3.4893	2.2238	1.2319	3.4511	2.7652	5.2733	2.2526	4.6053	7.0879	2.2487	2.9382	4.8651	1.3209	2.2577	3.3718	4.8425	1.5426	3.2025	3.5874	4.2304	4.6103	2.5401	1.0168	3.7163	2.3702	8.9889	9.6315	1.8562	2.3334	5.9039	2.0094	1.8159	5.2142	1.277
AL009178.3	0	0	0	0	0.2428	1.5859	0	0.053	0	0.6175	0	1.7744	0.1214	0	0.0449	0.102	0.8697	1.3502	0.1801	0.0827	0.0593	0.0527	1.0898	0	0.8266	0.3195	0.3889	0.5139	0	0.3889	0.5106	0.5586	0.6168	0.1626	1.7867	0.071	0.0996	0.4569	1.1098	0.2732	0.2596	0.22	0.4704	1.7509	0.0495	0	0.5134	1.9524	0.2209
AC064807.4	0.5459	0.7174	0.7346	0.6367	0.6122	1.2568	1.4488	0.1069	0.2945	1.6607	0.9623	1.6165	3.0214	1.0402	1.1778	1.0291	0.7018	2.1401	0.7267	0.6673	6.2227	3.2978	1.0552	5.9945	3.433	0.3223	0.3362	0.3888	0.1773	1.863	2.5012	1.0016	0.8295	1.7494	2.8834	2.7211	2.0085	0.2633	0.9426	3.2144	1.0473	1.1092	0.2109	0.1261	0.5987	0.4675	1.5064	2.6256	0.1114
AC008105.2	0.8085	0.5312	0.9066	0.7543	0.816	2.4533	0.6437	1.478	0.7269	0.6661	0.7125	0.8549	2.076	1.1669	1.7443	1.1937	0.433	0.4562	1.5246	0.5147	3.751	1.0765	3.2338	1.4795	1.8399	0.7689	0.6085	2.2389	0.3501	0.968	1.9246	1.4215	0.8957	0.4048	0.9785	1.2018	2.082	0.9749	1.8031	1.02	0.6462	2.9295	2.0297	3.0199	3.645	0.7788	0.5809	3.4464	0.9899
AC091588.3	0.6348	2.2752	2.621	2.0191	0.0647	3.4422	0.0766	5.8782	1.7123	6.0898	5.8492	1.0375	3.4962	0	2.6818	0	0.9273	0.1543	0.144	0	0.0633	0.3374	1.069	0.5281	5.6511	11.1855	9.0625	1.0274	0.0469	0.1037	0.1555	0	0.1096	0.0578	4.5722	0.757	0.0531	0.2784	0.1868	0.0971	3.3215	0.4691	1.7276	2.0002	2.9008	1.2972	2.3887	1.8294	1.1777
AC011379.1	0.1322	1.2065	0.8525	1.9016	0.0824	3.1513	0.3704	2.3163	0.951	0.8519	2.0229	0.1709	0.6922	0.4326	1.6457	0.4015	0.0472	1.2303	0.0367	0.0449	0.1932	0.8588	3.6558	0.4417	2.1643	1.8066	0.5277	1.0112	0	0.1055	0.4157	0.2022	0.6277	0.1324	1.8185	0.2312	0.0946	0.2126	0.2854	0.0618	4.0982	0.4328	0.0567	0.2037	1.1412	0.2673	0.19	0.6102	0.3447
AC064807.1	1.6712	1.8098	2.0655	1.4751	2.5782	3.652	3.6877	1.6005	1.2286	9.6374	1.6376	3.4857	2.9762	3.3664	4.8421	7.6142	5.0342	3.6523	3.0957	2.4334	10.7366	7.4935	2.9446	11.2727	9.298	2.7069	3.1271	2.2683	1.5294	4.1872	6.2706	3.9492	4.4364	3.3286	6.8118	8.3078	4.5772	1.6701	3.5771	8.4263	3.5056	4.5212	4.5202	2.8373	3.4089	2.352	3.0572	4.4204	0.7254
KC877982.1	0	0	0.0795	0	0	0	0	0	0	0	0	0	0	0.4913	0.0785	0.2673	0.1013	0	1.2586	0.5778	0	1.8424	0	0.2472	0	0	0	0	33.5505	20.6326	2.4208	9.3244	0.0898	0.3787	0.1561	9.9213	9.7398	2.0524	20.305	0.8748	0	5.6673	0	0.3277	0	0.3036	0	0.9301	0
CACNA1C-AS2	0.6567	0.3196	0.9819	0.5957	0.491	1.1453	0.0968	1.0005	0.2624	0.6243	0.2412	0.3087	0.6549	0.1896	1.0294	0.0688	0	0.065	0.0607	0.1115	0	0.5688	1.1753	2.6708	0.6555	0	0	1.0392	0	0.2621	0.3933	0.1674	0.1386	0.2192	0.1807	0.5743	0.5369	0.176	0.4725	0.3069	0.9916	1.8533	0.0705	0.0843	0.2001	0.7029	0.3146	2.6321	0.3723
AC009271.2	0	0.0221	0.204	0.0236	0.1814	0.0635	0.0537	0.0594	0.0182	0	0.0445	0.2566	0.8165	0.9105	0.0671	0.1334	0.2382	0	2.1194	0.0309	4.7641	0.6303	0	3.2507	0	0.0995	0.332	0	0.0493	0.9078	0.0817	1.6229	0.0384	0.4657	0.0167	2.7579	1.9153	0.4876	0.8509	1.3094	0.1293	6.203	0	0.0467	0	0	0.1569	4.7292	0
LINC02826	0.2139	0	0.0375	0.0312	0.06	4.5596	0.0118	0.0262	0.008	0.2965	0	0.6031	0.0333	0.0077	0.7764	0	0	3.9456	0	0.1429	0	0.3212	0.1076	0.4659	0.0961	0.1403	0.0274	0.4336	0.0217	0.2961	0.06	0.2146	9.2825	0.1428	0.8751	0.0584	0.1557	0.2257	0.4424	0	0.0071	0.3168	0.2237	1.0706	0.9691	0.0668	0.1153	0.3312	0.0455
AC006033.2	0.3839	0.2473	0.057	0.1053	0.0253	0.5907	0.0599	0.9067	0.0812	0.1073	0.0995	0.0239	1.0133	0.1369	0.3747	0.2767	0.0242	0.3621	0.1315	0.1552	0.6682	0.44	0.1455	0.4132	0.284	0.0889	0.1159	1.0184	0.11	1.2572	0.3347	0.6991	0.4074	0.1809	0.3541	0.2666	0.7477	0.2995	0.5605	1.5195	0.2527	0.1606	0.1744	0.7043	0.3095	1.7401	0.1558	1.012	0.2534
SNHG1	11.8092	10.1863	8.1807	7.7409	11.5109	25.4287	19.5169	8.3206	4.881	11.9286	14.0453	18.2884	14.4578	32.0099	20.862	49.8054	49.7727	34.8242	49.5246	13.6644	46.3366	34.2447	14.3787	60.094	54.632	27.9168	38.4054	41.5422	30.8759	39.7861	81.904	34.7085	29.8898	21.7127	17.6989	83.5263	25.1616	21.4493	56.5815	34.4881	101.482	38.6644	26.449	19.6173	26.4949	18.4384	26.0119	32.1789	23.9728
POT1-AS1	0.1136	0.0141	0.0934	0.0542	0.0058	0.4511	0	0.0581	0.0255	0.0196	0.3868	0.0082	0.5618	0.0179	0.392	0.0827	0.0415	0.0115	0.2642	0.0256	0.9535	0.4779	0.131	1.2857	0.0162	0.2972	0.1908	0.2206	0.13	0.2991	0.5253	0.4115	0.1741	0.2999	0.2003	0.0948	0.0546	0.0342	0.0975	0.1976	0.1424	0.9206	0.0449	0.1282	0.0307	0.1105	0.0334	0.3414	0.0632
ADNP-AS1	3.1348	1.4845	3.4559	2.5689	1.6627	6.1173	1.9674	3.734	1.5235	3.4633	3.3135	2.8223	4.3089	1.9445	3.6911	5.2303	4.0841	5.5858	3.1015	1.7475	5.2001	2.7654	5.0152	20.4337	4.3003	4.3761	3.1739	4.1228	0.8256	3.6521	7.8777	4.1778	4.9882	3.4787	4.8594	7.3902	3.2339	1.6348	5.3488	3.9908	3.4201	4.8202	2.2498	4.0131	4.8006	2.0857	2.009	5.2788	2.7663
AL390728.4	22.5896	6.5335	12.1118	13.0998	7.083	23.3793	6.8794	18.1339	6.5479	17.7976	17.1343	18.9714	26.7576	17.6927	12.7357	20.379	17.5644	11.1991	12.3922	7.591	29.8539	25.8377	41.5883	36.6555	41.2699	25.9485	24.1768	28.9345	5.7634	23.0203	44.8837	15.6415	19.3215	9.0033	33.4128	10.4162	14.8162	17.4414	20.7146	17.0453	27.5619	24.8514	20.1045	33.679	33.4483	16.7794	18.7333	45.3809	20.1729
AC007365.1	0.4961	0.6209	0.3576	0.3306	0.0795	0.1483	0.6583	0.0694	0.0637	0.3369	0.1562	0.5996	0.318	3.8056	0.1176	2.9391	0.0759	0.1894	1.2383	0.5956	3.2625	1.0358	0.3996	2.5015	0.764	0.4881	0.1455	0.5047	0.1727	1.7185	1.4326	0.8127	0.3365	0.8517	0.3509	1.6733	1.5645	2.2222	0.8413	0.4173	0.1133	5.1843	0.4106	1.3101	0.2591	0.1517	0.0611	0.9296	0.5062
AC009065.5	4.6974	0.6532	1.1914	2.6955	0.6689	16.5403	1.0883	1.0953	1.1396	13.3964	4.1891	6.3079	11.822	0.3229	28.2134	3.865	17.4915	22.7184	0.3722	1.31	4.0859	5.9569	12.0698	3.2164	20.2283	18.7056	41.6293	11.2385	0.3027	2.3435	2.1099	1.539	15.7183	1.2693	18.8901	2.8362	1.8516	2.3378	1.8507	0.6899	116.04	1.9695	26.5672	8.5277	7.0866	0.6384	28.8028	1.8745	11.868
AC004943.1	0.5499	0.1147	0.6607	0.5497	0.0881	1.0413	0.278	0.2821	0.1648	1.3443	0.2885	0.9138	0.568	0.4309	1.0213	0.5923	0.7293	0.6066	0.3922	0.2601	0.574	1.0971	1.181	3.9365	1.5997	0.6956	0.43	1.0567	0.1276	0.4938	2.3995	0.6006	0.6465	0.3934	1.2966	1.3739	0.4335	0.5053	0.3109	0.3965	0.4186	1.41	0.708	0.7563	0.8855	0.5325	0.5871	1.8892	0.4809
AL355388.1	0.103	0.1354	0.4505	0.3123	0.2772	1.4875	0.1093	0.5851	0.0741	0.5288	0.4312	0.5664	1.0015	0.2676	1.0428	0.3107	0.6621	0.5874	0.6856	0.3777	1.2419	0.7828	1.9745	3.2047	1.8693	0.5067	0.6978	1.1248	0.1506	0.2405	1.3326	0.9214	0.5282	0.8252	0.5781	0.8647	0.7769	0.0994	1.1783	0.6758	0.494	1.1302	1.9894	1.19	1.0732	0.6836	0.6395	0.8557	0.5465
LINC00858	0.0282	0.0309	0.1977	0	0.0105	6.2774	0.0749	0.396	0.0676	0.1877	0.0518	1.402	0.5907	0.4316	1.5215	1.0635	0.3828	0.5361	0.4928	0.0144	0.5668	0.0366	2.8777	2.4829	1.0136	1.6744	1.7275	0.4799	0.3665	0.988	6.0059	0.6362	2.4376	0.4614	0.5742	0.3453	0.0086	1.6442	0.4566	0.3164	0.8493	0.9075	1.7251	4.5516	3.3514	0.0101	0.3405	5.4885	0.8731
AL133467.2	0	0	0	0	0	0	0	0	0	0.0439	0	0	0.0345	0.04	0.0383	0.3048	0	0	0	0	0.0253	0	2.9576	0.2113	0	3.0449	0	0	0.0375	0.1037	0.1245	0	0	0	0	0	0	1.7826	0.0249	0.0389	0.0185	0	0	2.1613	0	0.0742	0	9.114	0.0471
AC010976.1	0.8549	0.3886	0.8072	0.8277	0.4974	2.1604	0.503	0.7425	0.3481	0.8894	0.773	1.1002	1.4959	0.6496	1.4523	0.8589	0.8207	2.0047	0.463	0.5175	2.6606	1.2022	2.6436	2.2561	1.7895	0.9839	0.8029	1.9335	0.334	0.9633	2.7822	1.341	0.8195	0.7027	1.3578	1.1002	0.6824	0.7489	1.0966	0.5495	1.7019	1.3683	0.5529	1.2765	1.5994	0.6474	0.7163	2.1951	0.9957
AC116903.2	0.6134	0.0373	0.0573	0.1192	0.344	0.2496	0.4522	0.3004	0.0613	0.0972	0.1502	0.036	0.2804	1.3576	0.4525	0.6745	0.292	0.2429	0.5954	0.4426	0.747	0.2988	1.0704	1.2473	1.6838	0.1676	0.07	0.8494	0.083	1.7138	0.3674	0.2736	0.2265	0.8532	0.3937	1.9221	1.7239	1.274	0.2942	0.3726	0.0817	1.4887	0.0329	0.315	0.7475	0.2553	0.5289	0.2608	0.9388
MRPL20-DT	1.4589	1.2142	2.2085	1.6333	1.2761	4.2134	3.7556	2.5147	0.6558	2.2468	1.7679	5.6466	6.8522	2.1226	4.8909	3.465	6.4699	2.2096	1.8935	1.4711	6.7476	4.2643	6.6032	19.7954	4.9803	6.4589	2.8449	2.9089	3.9567	6.6817	12.5819	4.1824	3.602	8.5906	1.7578	5.8556	4.106	1.2667	7.935	2.4297	24.6527	7.6183	3.3247	6.3035	3.4132	1.624	3.0946	10.1422	3.3046
AC018865.2	0.0108	0	0.0455	0	0.0364	0.2037	0	0.0953	0.0097	0.0103	0.0119	0	5.7199	0.0281	0.377	0.6219	0	1.4456	0.009	0.0083	2.5016	0.0422	2.3261	1.5272	0	6.7261	0	0	0.0615	1.6029	12.507	11.1271	2.0031	0.0325	0.5535	4.3418	0.0099	0.287	15.9233	0.5368	5.5426	0.1868	0.0522	0.5874	1.7399	0	0	15.5371	0.011
PANK2-AS1	2.8215	0.6621	2.2882	2.4678	1.356	6.432	2.4068	2.862	1.1778	6.1308	1.2211	2.9837	5.9537	4.1016	4.0136	4.7486	3.8859	3.9501	5.3654	2.3093	6.1847	3.7308	11.037	17.3873	5.0693	4.1638	6.4121	7.1757	2.8638	5.52	20.368	2.1955	5.4543	2.9264	9.8126	5.1547	1.8536	5.1038	7.8296	2.797	3.2219	9.8278	9.4384	10.128	6.6305	1.51	3.4756	5.6174	2.6732
TMEM161B-AS1	1.0765	1.1664	3.6363	1.9862	0.5313	3.4494	0.793	2.7409	1.5506	2.2809	3.072	0.9393	1.2738	0.6522	1.2529	0.3013	0.3939	1.0469	0.3816	0.7471	2.1893	1.4046	1.4195	6.5058	2.143	1.1386	0.6899	1.6015	0.2934	1.3752	2.4654	0.3419	1.561	0.7288	2.3356	0.4856	0.6659	0.7207	0.6054	0.7322	0.507	2.4915	0.6893	0.5751	1.8683	0.8019	0.7517	2.9569	0.6059
CERNA2	0	0	0.4587	0	4.3346	0.7692	79.0731	0.0697	0.0426	0	0.0784	12.0117	0.4611	50.1709	0.0394	42.2849	0.127	6.8661	126.835	6.3764	15.0479	83.2894	0	7.9664	0.1065	0.14	0.0243	0.1407	57.3609	9.0929	0	1.1149	0.0225	16.1478	0.5871	0.2177	52.4534	100.001	5.4508	11.2894	0.019	159.892	1.1678	0	0.13	0.1269	1.0019	0.8554	0.6533
AC034199.1	0.0782	0.0214	0.0164	0.0684	0	0.1433	0.026	0.0575	0	0	0.0646	0	0.2048	0.1186	0.0649	0.1659	0.1048	0.8364	0.0651	0	0.1929	0.2287	0.1733	0.1534	0.0879	0	0.1004	0.1393	0.1112	0.1054	0.0264	0.1794	0.0929	0.0392	0.1614	0	0.1079	0.1179	0.2955	0.1481	0.1094	0.0596	0.0755	0.113	0.143	0.4815	0.1518	0.1069	0.5588
AC021321.1	0.559	0.0874	0.5708	0.1862	0.0448	0.6267	0.1589	0.3128	0.0718	0.4175	0.2199	0.2533	1.1944	0.3804	0.3644	0.7902	0.2566	0.2134	1.528	0.183	1.0065	0.6613	1.2219	4.1231	0.3945	0.1571	0.1229	1.0425	0.0648	1.9003	2.3673	1.5109	0.7962	0.7997	0.2965	0.5761	1.2486	0.5296	0.7325	0.403	0.2553	1.3791	0.7325	0.6458	1.2041	0.2564	0.3787	1.0911	0.5296
GAS5	34.756	22.975	25.5254	29.9575	45.934	66.3795	79.8156	21.3383	16.932	36.2335	21.4343	49.8566	38.9806	143.522	86.2254	84.7512	134.293	143.189	158.223	29.39	105.103	89.0791	41.4509	194.087	114.576	106.203	69.223	53.8852	56.3469	86.308	69.6891	102.181	66.357	70.7319	63.3023	110.075	55.6021	84.7339	80.0167	91.3698	106.909	248.594	77.4289	35.7419	42.3983	45.0684	44.3562	43.7087	24.038
AL691482.3	0.1351	0.2958	0.568	0.1575	0.9088	2.9681	1.0156	2.1606	1.093	0.8988	2.976	4.428	11.7183	4.991	7.9206	0.4243	2.5562	22.0218	0.3371	3.0955	0.7402	6.3607	52.3239	0.412	10.961	7.2202	7.2087	4.9696	0.4022	1.5769	2.3662	0.3098	11.3299	1.3075	19.5439	0.2362	0.8696	1.1402	13.2646	1.9314	8.9253	0.5946	4.3476	2.1846	8.97	0.1928	2.3294	0.9843	7.0746
RBM38-AS1	1.5961	0.5549	0.7671	0.5909	0.7103	2.2269	0.9413	0.7196	0.4556	0.5058	0.6978	0.8841	2.0085	0.4608	1.4086	1.0984	1.8998	1.5575	0.1054	0.6193	1.6661	1.2095	1.6732	4.1729	2.0029	1.2214	1.0661	2.1951	0.2263	1.5016	2.2191	1.8303	1.4195	0.5835	0.8572	1.1963	1.0486	0.6111	2.1326	1.513	1.6404	0.9009	0.7339	1.2	2.6627	2.2778	0.5025	2.797	1.1374
LINC01564	0	0	0.0831	0	0.443	1.6189	5.4599	0.2257	0	0.0626	0.1088	0.6266	0.2216	12.9426	0.0546	0.7136	1.6925	2.8154	19.7727	0.5281	0	4.5542	2.1473	0.2582	0.2661	2.9794	0.0338	0.1563	4.4637	10.5531	0	0.1132	0.5626	0.1648	0.4618	0.2591	5.5405	12.3851	10.3728	0.6091	0	17.5904	0.6993	0.5704	0.2407	0.1409	0.1419	0.1079	0.6717
AC127024.5	4.3284	1.6853	1.9415	2.58	1.0787	4.1266	1.1487	3.2029	0.7783	3.3832	2.5431	2.0344	3.8127	1.3328	3.9908	2.357	2.1637	3.5135	5.4416	1.7635	9.277	3.9361	9.9931	13.9565	6.2214	3.596	3.159	17.238	1.6402	3.0232	7.388	3.8605	2.7402	3.4677	4.3658	6.6867	2.831	2.7839	2.9065	3.8835	3.8443	10.6514	1.8576	2.8892	6.2412	3.6033	2.4882	16.8222	2.1591
C6orf223	0.1595	0.0175	0.0067	0.1674	0.1252	0.5342	1.1961	0.0312	0.0072	6.6882	0.0088	3.1801	2.6488	0.152	0.5825	0.1654	43.8428	0.5685	0.0796	0.1158	0.2972	4.9273	1.8887	0.1356	11.15	2.9664	14.7526	7.8577	0.2202	0.2436	0.1827	0.5122	1.3256	0.0639	10.46	3.097	2.0029	2.5395	0.0861	0.1141	2.7481	2.6905	21.5901	65.7052	1.1008	2.3906	11.1769	2.7814	5.6077
DNAH17-AS1	0.0116	0	0.1074	0	0.0065	0.595	0.154	0.0114	0.0209	0.0055	0.0128	0.2025	0.2517	0.2211	0.1252	0.339	0.1616	0.0207	0.4924	0.0266	0.0509	0.4353	0.0421	1.2135	0.1042	0.5252	0.0834	0.0344	0.1084	0.3283	0.774	0.6254	0.1543	0.3893	0.0718	0.3425	0.3415	0.1679	2.1539	0.6247	0.1484	0.1002	0.2297	0.2882	0.2174	0.0932	0.1101	0.8372	0.1125
LINC02875	0.7261	0.159	0.0977	0.1694	0.0651	0.1216	1.0406	0.1422	0.0261	0.3313	0.064	0.4914	0.8255	8.2002	1.1087	0.9855	0.4978	0.207	6.0169	0.1775	0.5412	1.0187	1.1696	0.4936	1.3307	0.0857	2.027	1.241	0.1415	1.565	1.5264	3.9968	0.7998	0.2327	0.5992	0.9524	3.6064	3.5726	1.818	0.513	1.8341	2.5967	3.2534	4.0937	0.8494	0.373	1.8032	1.0159	1.0372
LINC01126	1.0259	0.2956	0.999	0.4723	0.4541	0.678	0.3582	0.5553	0.0728	1.0779	0.1785	0.7138	1.0298	0.8885	1.1426	1.8066	0.4627	0.3367	0.4717	0.2681	2.4855	1.5519	1.2176	4.6232	1.2854	1.753	1.0806	1.0253	0.1096	0.3152	5.1296	1.9814	2.5637	0.757	1.0249	2.5496	1.2912	0.6511	0.7867	0.545	0.1511	1.7828	1.2253	2.0585	2.9608	1.7338	0.3259	2.4494	1.2396
LINC01932	0	0	0.0652	0	0.4349	1.055	3.6018	0.1519	0	0	0	0.6561	0	6.918	0.0644	1.0964	1.1631	0.2764	4.1939	2.192	5.9499	5.2137	0.1874	0.5069	0.1393	0.6104	0.1592	0.6443	7.6198	8.4271	0.1045	0.4447	0.4419	1.0873	0.064	0.6103	9.5583	20.0142	2.4271	1.109	0	5.988	0.2996	0.0896	0.0709	0	0.2675	0.0848	0.0791
Z93403.1	0	0	0.0286	0.0396	0	1.422	0.2254	0.0333	0	0.3876	0.0374	0.0359	0.3811	2.2362	0	0.064	1.4557	0.454	1.9221	0.1038	1.8245	2.1185	0.0547	0.3109	0.0916	0.7688	0	0	0.1379	2.6543	0.0458	0.3896	0	0.5103	0.0561	0.3565	4.5309	1.5159	0.5866	0.2858	0.1358	1.9329	0.164	0.314	0	0	0	1.2998	0.2773
AC017083.1	0.4085	0.2485	0.5345	0.1588	0.0509	0.9025	0.1205	0.3112	0.0408	0.4747	0.35	0.864	0.8487	0.4324	0.7157	1.2406	0.2917	0.8492	0.9819	0.0694	0.597	0.9287	0.9139	2.9074	0.6932	0.3573	0.4659	0.9697	0.1106	0.5707	2.8137	1.4575	0.5604	0.2273	0.5993	1.0717	0.4592	0.3832	1.8614	0.3054	0.254	1.0145	0.526	0.8915	0.5393	0.2429	0.6262	2.5304	0.6021
FLJ16779	0.3025	0	0.044	0.2578	0.013	0.0365	0.0232	0.0114	0	0.0055	0.0192	0.0123	0.1828	0.0453	0.1014	0.3071	0.0623	0.0156	0.1985	0.0622	0.3061	0.0907	0.0187	0.1141	0.0105	0	0.006	0.1243	0.2693	0.3762	0.0941	0.387	0.0442	0.0233	0.024	0.0076	0.5458	0.0772	0.3139	0.3475	0.014	0.0177	0.0506	1.0822	0.0106	0.1432	0.0201	0.1463	0.0059
AF241728.1	0.3766	0.0412	0.0633	0.3513	0	0.3547	0.05	0.3688	0	0.3938	0.1245	0.3186	0.169	0.3261	0.1563	0.1065	0.0807	0.1342	0.4073	0.1726	0.5366	0.8439	0.6066	0.1477	0.6766	0.6299	0.1933	0.1341	0.2141	0.5073	2.1821	0.1727	0.2503	0.6034	0.3108	0.6916	0.6581	0.7721	0.2032	0.2217	0.0903	1.7982	0.1091	0.4351	0.0344	0.0403	0.2598	0.9468	0.2306
KLRK1-AS1	0.3526	0.0833	0.3779	0.1612	0.4109	1.2081	0.7981	0.6974	0.2051	0.092	0.2437	0.6726	0.6205	4.4545	0.2467	1.3487	0.037	0.4496	4.8026	0.4859	9.5696	2.4248	0.5011	4.9522	0.9564	0.0136	0.6173	2.0923	0.4154	1.7756	0.2702	0.769	0.3151	2.1808	0.8957	0.7164	2.3844	9.9876	4.7375	2.169	0.1768	2.1351	2.7103	0.607	0.0948	1.0951	0.5544	0.597	0.4444
AC005865.2	0.2477	0	1.4283	0.0413	0.0397	0.6664	1.1268	0.104	0.0636	0.2018	0.039	0.1497	0.6086	0.1838	0.2936	1.4005	0.3411	0.1261	1.5012	0.1622	0.0388	1.0686	0.228	19.1473	0.8582	0.3481	0.2542	0.4619	0.0287	1.4933	0.143	0.1623	0.504	7.8303	0.6716	2.1812	1.5295	1.152	0.7636	0.2381	0.2263	2.3364	0.5125	0.5314	0.4203	0	0.6407	0.1934	1.2635
AL031985.3	3.0303	1.7486	1.6024	1.3755	1.4041	2.5633	2.6245	2.0437	0.9136	5.2612	1.979	2.5521	4.1799	1.4458	2.3339	2.8731	8.8635	1.6005	6.9595	1.2198	7.597	3.7303	4.2526	12.3579	5.6727	4.0346	3.9295	4.0057	3.8604	3.3731	31.9582	15.3355	4.0837	6.0874	5.2411	8.6396	4.0388	1.9913	1.4882	2.7778	6.1499	19.1167	2.8385	6.4776	3.1342	2.9909	1.3769	8.0329	4.2953
AF196972.1	0.2722	0.6707	0.3434	0.3174	1.2974	0.5697	0.7224	0.4665	0.0612	0.2588	0.2249	0.6477	0.6617	0.5894	1.0165	1.6035	3.9365	0.7882	0.7926	0.4679	0.3729	0.1989	4.549	0.5337	0.3668	0.7365	0.908	0.8077	0.4973	0.6111	1.5589	1.3266	0.7755	0.4089	0.1685	0.8034	1.0641	0.1641	1.9094	0.6869	0.9248	0.3457	0.9857	0.3931	0.8085	0.9469	0.3521	5.1326	0.2083
AL158212.2	0.1932	0.1058	0.2437	0.338	0.1083	0.2022	0	0.0946	0.1737	0.8265	0	0.1022	0.578	0.1673	0.3207	0.8194	0.1035	0.1721	0.2411	0.1476	0.4235	0.3765	0.1556	0.2526	1.1282	1.0455	0.694	0.4586	0.2353	0.347	0.9112	1.1078	0.3669	0.2902	0.3986	0.5069	0.5331	0.3495	0.1043	0.0813	0	0.4907	1.0261	0.8928	0.7946	0.1034	0.3332	0.3168	0.1971
AC016590.3	0.9442	0.2585	1.489	0.3441	0.0662	0.9263	0.2349	1.3871	0.5306	0.561	0.6501	1.685	3.8841	0.46	0.8815	1.2237	0.1264	0.4206	1.1784	0.4508	0.1294	2.185	1.0456	12.0345	0.3711	1.1612	0.3634	0.9806	0.0958	3.7628	8.1115	11.0986	0.7846	0.8274	0.5844	1.8578	0.9227	1.4945	1.3374	1.0921	0.3302	4.7964	1.7666	0.6818	2.8585	0.5053	0.5089	6.1282	0.4215
AC010186.3	2.2503	0.8149	2.8015	0.9918	1.232	1.9468	0.7289	1.3188	0.462	1.4654	0.976	0.8057	3.684	2.7621	1.3674	3.3733	1.5374	0.5051	4.7172	1.1099	1.2623	8.0275	0.7563	39.3748	2.0374	0.4358	1.0911	5.8251	0.7194	4.2803	11.0548	2.0115	3.9372	14.6032	1.5353	7.1814	6.2417	3.8675	3.0785	3.0255	0.7082	10.6926	2.344	1.8628	2.6394	4.2481	1.3445	3.7573	1.4101
GK-AS1	0.8191	0.2243	0.1148	0.398	0.3828	1.1429	0.4529	1.1365	0.0614	0.7138	0.3008	2.3822	2.0421	1.4779	1.6427	0.579	1.17	7.4803	0.1136	0.6779	3.8155	2.5273	4.9478	1.2492	6.6228	0.5373	0.8407	6.2382	1.2194	2.2681	0.3679	0.3914	0.713	0.3418	4.7319	1.7907	1.3812	2.4696	0.442	1.3206	0.6002	0.8322	0.791	1.8138	2.6201	0.8037	0.5886	2.0892	3.3432
AC090559.1	3.8359	0.5313	0.3315	1.3615	0.5271	1.8086	0.2615	2.1382	0.3408	0.6918	0.1336	0.1283	2.1318	1.4575	1.862	1.4147	0.4385	1.3373	0.6685	0.915	2.775	1.7431	1.4653	1.3675	0.6129	0.3282	1.7428	2.8071	0.6032	5.9363	0.5108	1.5648	0.6911	0.9413	1.3513	2.2472	2.0638	1.5175	1.3417	4.7823	0.9938	2.7571	0.5563	1.9442	1.5796	6.2477	1.1112	1.8396	2.9238
AL590096.1	0.0565	0.0618	0.1425	0.5268	0	1.2999	0	0	0	0.4294	0.1244	0.418	0.7602	0.3912	0.3748	0.2129	0.8468	0	0.2819	0.0863	0	0.5501	0.955	0.8119	0.1522	0.1111	0.2318	0.2681	0.0459	0.2535	2.7392	0.1943	0.4826	0.0565	0.0932	0.2222	0.0519	0.4086	0.6094	0.2375	0.2708	0.8031	0.8179	0.4566	0.516	0	0.1461	0.6789	0.1728
AC012501.2	0.0452	0	0.038	0.158	0	0.3781	0	0	0	0	0	0	0	0.6649	0	0.0851	0.6289	0	0.3006	0.0345	1.6334	0.088	0.8002	0.5903	0	0.2222	0	0.0536	0	1.3789	0	0.1036	0.1287	0.0452	0.0373	0.1185	0.2908	0.3812	0.6336	0.114	0.1805	4.4504	0	0	0	0	0	0.7898	0
AC022031.2	0	0.0183	0.3943	0	0	0.9461	0	0.0328	0	0	0.0184	0.0531	1.1897	5.1333	0	2.2882	1.5604	0.0149	5.5582	0.1023	6.4229	2.2187	0.3371	7.3542	0.015	0.2965	0.8936	0	3.5622	1.7142	16.8996	3.1681	0.0159	0.5533	0	5.82	7.5307	4.1394	2.1141	1.7464	0.7495	8.4543	0.0485	0	0	0	0.6353	12.9214	0.2221
ERVK-28	0	0	0	0	0	0.2345	0	0	0	0	0	0.079	0	0.9055	0	0	0	0.1996	0.1243	0	0	0.2911	0	0	0	0.2204	0	0	0.0606	0	0	0	0	0	0.2465	0.098	0	0	0	0	0	0.0759	0.1442	0.2588	0	0	0	0.0816	0
AC126407.1	0.0785	0	0.3962	0	0.3522	0.4108	0.5209	0	0	0	0.173	0.3321	0.2349	0.476	0	0.37	1.5139	0	0.2613	0.4198	2.9257	0.612	0	3.5921	0	1.8538	0	0	0.1913	1.6922	6.5595	0.09	0.0746	0.8649	0	0.9268	0	0.8521	0.3389	0.5283	1.3179	6.1418	0	0.9977	0	0	0	2.9179	0
AP002381.2	1.2658	0.2622	1.0358	0.5186	0.9975	2.649	1.1348	0.6031	0.5229	1.6261	0.7161	0.5065	0.9722	0.7999	1.1355	1.6121	2.0155	1.7373	1.6223	0.8885	1.3123	3.1331	1.7633	3.8011	1.1063	1.3463	1.7555	1.5429	0.2222	1.7204	3.4113	3.4914	1.4943	0.6509	0.4235	1.4808	1.4159	0.9489	19.2712	1.5538	1.1758	4.5529	1.6186	1.5809	1.3131	0.7689	0.9144	1.9819	0.733
AC087588.1	0	0.6854	0.4387	0.6083	0.5849	3.6021	0.8305	1.5324	0.8441	1.8842	1.379	0.9928	3.5108	0.0903	1.7312	2.0646	0.1117	6.5056	13.3652	0.2391	0.686	2.3376	2.1003	2.8636	9.5585	5.6446	6.6379	5.9427	2.9647	0.3747	16.1653	2.3924	17.038	1.1491	10.2442	2.1892	0.7676	0.629	6.9796	0.8774	6.087	1.2717	2.619	1.5667	11.1539	0.4466	1.9789	4.1049	2.0223
AC005540.1	0.0967	0.053	0.122	0.3383	0	0.3542	0.0642	0.2841	0.0435	0.1839	0.1065	0.3068	0.217	0.1256	0.321	2.3243	0.2072	0.3877	0.6034	0.2216	0.795	0.424	1.1683	0.316	0.8688	1.0466	0.6452	0.4591	0.3534	0.3474	0.3258	0.2773	0.1837	0.1453	0.399	0.6343	0.1779	0.6998	0.2609	0.3254	0.1546	0.1965	0.5603	0.5028	0.8396	0.1553	0.1668	0.6871	0.3947
AC020765.2	0.5143	0	0.0865	0.2399	0	0.6458	0.273	0.3022	0.0925	0	0	0.5439	0.1539	0.2673	0.0854	0.097	0.3306	1.0998	1.1981	0.1572	0.3382	0.3007	0.9941	1.3447	1.7558	0.1012	0.3167	0.6104	0.0835	0.6466	0.4158	1.8874	0.5861	0.4121	0.4245	1.2143	0.5677	0	2.6643	0.4326	0.4111	0.9406	1.3906	0.1188	0.8461	0.9909	0.6209	1.1244	0.2099
AC087392.3	0.1772	0.4714	1.0222	0.502	0.2556	1.4573	0.336	0.7688	0.3642	0.2648	0.8089	0.4284	0.4166	0.9649	0.7984	0.6682	0.3255	0.5414	0.4213	0.5803	0.6383	0.6414	1.1624	1.986	1.615	0.9466	0.5457	0.8415	0.1439	0.5003	1.2966	1.9454	0.2404	0.5325	0.5015	0.8303	0.9316	0.458	0.7651	0.6815	6.1935	1.5692	0.6602	0.6143	4.4199	0.5962	0.2838	1.1348	0.3875
AC112484.5	0.3596	0.3401	0.8522	0.4765	0.4216	0.6499	0.2169	1.1044	0.2939	1.8644	0.3421	1.0024	0.6845	0.9908	0.8544	0.9704	2.0133	0.1747	1.7949	0.6867	0.5374	1.1306	0.7503	2.2432	0.2936	1.3667	1.1406	0.4849	0.2522	2.319	2.7309	0.4685	1.7382	0.7365	1.7264	0.5359	2.2097	1.2614	1.1288	0.6599	0.9406	3.8355	0.2052	0.7553	2.5093	0.4548	0.3523	1.054	0.2501
AL592546.2	0.4495	0.0703	0.324	0.5242	0.144	1.9487	0.4261	0.6918	0.1155	0.7936	0.6367	0.2716	1.3448	0.5562	0.7993	0.9079	1.5134	0.9726	0.5877	0.0981	0.4927	1.8145	0.8792	0.3358	3.0575	1.3268	1.1864	1.753	0.1043	0.519	0.4327	0.5891	0.9147	0.1286	2.2788	0.6738	0.6497	3.2525	0	0.2701	0.308	0.5872	2.2323	2.9675	2.0541	0.3437	0.8306	0.9827	1.4415
GS1-124K5.4	1.8663	1.581	2.3395	2.2175	1.1847	2.2845	1.6354	2.552	2.2478	0.5356	0.8534	1.5267	1.4748	2.0127	3.2434	3.0201	3.5834	2.7607	8.0856	1.7216	1.5437	2.0928	3.6583	5.9839	1.8663	0.5543	2.6382	2.2568	1.0579	1.7392	2.847	15.2634	2.7085	1.1284	0.7265	5.681	1.8784	2.2506	8.7781	2.9026	2.2517	4.9368	5.4403	1.6679	1.9308	2.2613	1.2145	2.0015	0.5749
AC090772.3	0.7255	0.1324	0.0508	1.1281	0.1356	1.3286	0.1605	0.3553	0	0.4023	0.333	0.1918	0.8591	3.6129	0.8027	0.3989	0	0.3232	3.7726	0.3233	1.259	0.3534	1.8503	2.292	1.4122	0.3569	0.3103	0.7893	0.4418	0.1086	6.1919	0.2773	1.6076	0.7871	1.4968	2.4584	0.7229	0	3.2623	0.6611	0.3866	3.2555	0.8173	1.7462	0.221	0.3236	0.1043	2.4452	0.4318
SPATA3-AS1	0	0	0	0	0	1.3234	0.0305	0	0	0.7432	0.0507	0.2675	0.1118	0.01	0.0572	0.1517	0.1108	0.1639	0.0478	0.0088	0.0378	0.2464	0.1204	0.1202	0.3099	1.2217	0.4956	0.1501	0	0.1033	0.2789	0.1582	1.0154	0.023	1.3189	0.0151	0	0.0139	0.1489	0.058	0.2206	0.1051	0.3886	0.6376	1.2504	0.0369	0.5651	2.0862	0.3402
AL590062.1	1.8819	0.2169	0.6386	1.001	0.3702	0.5873	1.7962	0.1617	0.2968	1.1613	0.1819	0.6284	0.8148	1.4868	0.7671	1.6803	0.1415	0.3236	1.2086	0.4288	0.6513	3.1524	6.9132	1.8558	0.7711	0.065	0.9488	1.058	0.6434	1.7789	13.747	5.8304	3.0724	0.1984	0.5722	0.6496	0.6984	1.9509	6.4845	1.3052	1.3195	4.8635	3.8894	3.4327	0.0302	0.212	0.911	2.3457	0.2021
AL355303.1	0.0654	0	0.055	0	0.0733	0.7522	0	0.192	0	0	0	0.3455	0.0489	2.2073	0.0542	0	0.63	0	0.1087	0	0.0716	1.7828	0.9474	0.0854	0.1761	0.0643	0	0.0776	0.2653	1.7019	0	0	0.1241	0.0654	0	0.1714	1.0819	0.6305	1.7631	0.055	0.2089	1.7926	0.3786	0.2265	0.0597	0	0.3381	0.1429	0
AL683887.1	0	0	0	0	0.3473	0.6481	0.8218	0	0	0	0	0.9824	0	0.8046	0	0.2919	0	0.1379	1.0306	0.9463	1.8667	2.4137	0	0.2024	0	0.457	0	0	0.5029	3.8933	0.4173	0.1776	1.1763	2.791	0.2556	0.2031	9.5416	1.4938	2.8406	2.735	0	8.0225	0	0	0	0	0.267	0	0
AC021148.2	1.7566	3.4218	4.2331	4.5107	0.2841	2.6688	0.4931	2.3986	2.5816	3.3398	0.7815	0.8216	0.8211	1.141	0.9391	0.6208	0.3076	0.4665	0.6745	0.4129	1.1107	1.7444	1.4011	6.0938	1.1683	0.4985	0.7801	1.5235	0.6035	0.455	1.9574	0.8716	0.6576	0.9641	1.9096	2.6364	1.0874	0.2037	0.5833	0.4688	0.7156	1.4929	0.7339	0.2146	0.9416	0.4881	0.8447	1.237	0.517
LINC02561	0.5137	0	0.054	0.2247	0.144	0.4704	0	0.1258	0	0.061	0.1415	0.2716	0.2882	16.184	0.2132	0.6658	2.4076	0.3433	12.1813	0.2943	0.0704	6.4444	0.5172	0.4197	0.8653	0.1895	0	0.4573	0.4693	13.7828	0.0865	0	0.6098	0.5788	0.318	3.0323	48.7277	16.495	22.1071	0.4321	0.3593	12.9176	0.6821	1.8547	0.7043	0	0.8306	0.0702	0
LINC02804	0.0854	0.1496	0.402	0.1195	0.0383	1.2862	0.1586	0.1505	0.1074	0.5031	0.1693	0.2528	0.715	0.1922	1.2608	0.3218	0.4389	0.1825	0.0284	0.0782	0.58	0.2661	2.1724	2.0308	0.3834	0.1176	0.2103	1.0941	0.1941	0.046	0.138	0.2349	0.4863	0.2564	2.3387	1.2988	0.1413	0.2676	1.0501	0.3303	0.9962	0.8325	0.4286	1.1242	0.6553	0.4385	0.6183	2.6312	0.6271
AL354892.2	10.9166	4.8301	4.5442	4.6294	4.2044	4.9616	4.5359	3.3478	2.6768	8.1764	2.1866	6.1803	3.6287	5.2524	8.2352	9.0416	9.804	8.7434	9.2657	4.4645	7.7347	9.6692	10.0352	26.8105	12.1842	8.1364	15.2783	3.6644	5.4619	7.0307	50.075	41.7281	11.7277	7.0672	5.0959	53.5149	4.7667	4.7872	25.9417	3.6173	2.9087	29.3508	12.032	5.9874	6.1472	1.1802	2.8525	16.5128	2.3627
SPATA41	0.7454	0.101	0.168	0.3316	0.2413	0.0724	0.3467	0.3537	0.1036	0.263	0.1016	0.3576	0.3276	2.2361	0.3635	0.4563	0.3951	0.0753	0.7544	0.2524	1.0864	0.6139	0.3899	2.2802	0.2278	0.1663	0.0079	0.383	0.1997	1.1524	0.7248	0.6609	0.5327	0.5156	0.2473	1.784	0.9541	1.0842	0.199	0.3296	0.3133	0.8509	0.0965	0.3107	0.1615	0.2221	0.2054	0.4368	0.1098
MLIP-IT1	0.6911	0	0	0.0806	1.085	0.5062	0.1834	0.0677	0	0	0	1.6809	0	2.454	0	0.456	0.074	0.3694	0.805	1.9534	1.5149	1.5487	0	0.1807	0.1863	0.476	0	0.164	0.7857	1.3033	0.0931	0	0.1313	1.9379	0.2281	0.9971	1.2713	0.9168	0.5221	0.5232	0	3.0893	0.6006	0.1597	0.1263	0	0.1788	0	0.0705
LINC00615	0	0	0	0	0	0	0.0419	0	0	0	0	0	0.0236	0.0547	0	0	0	0.0845	0.0263	0.0724	0	0.6159	0	0	0	0.1244	0	0.1125	0	1.5327	0.0426	0.0362	0.09	0	0.0522	0	0.6977	0.8766	0.0341	0	0	0.1284	0	0.0365	0	0	0.0273	0.0345	0.0645
AC015660.1	0.0702	0.0128	0.0131	0.0091	0.1006	0.9919	0.559	0.0611	0.021	0.6415	0.1289	1.8233	0.9919	11.8342	1.0229	3.9559	0.3385	0.0104	0.1493	1.7075	0.1496	0.2052	0.1477	0.1581	0.1191	0.4951	0.1842	0.6713	0.0602	15.5325	0.2628	0.076	1.7336	0.3594	1.0301	0.0102	1.2988	2.5026	0.2105	0.5709	0.1902	2.6116	0.5575	2.046	0.3137	0.1211	1.6515	0.1151	4.3781
AC007849.1	5.9771	9.6758	9.398	5.8592	0.4857	24.3832	1.2644	13.7436	6.3085	18.1167	16.1275	6.962	7.3857	0.9002	26.5244	0	0	3.087	1.1531	4.1028	0.2848	3.5448	3.558	0.4529	6.6145	8.8633	7.3792	9.5613	0	1.867	0.4669	0.298	16.0404	1.9084	14.6547	4.3176	3.1072	0.4179	6.2633	4.5904	16.6874	6.8644	0.6692	0.1001	4.4333	2.4106	1.4192	6.5334	11.3133
AGAP2-AS1	1.2147	0.1622	0.0249	0.3455	0.6977	0.248	0.7862	0.1741	0.1065	0.9294	0.1632	0.6892	1.7282	4.6952	2.4829	6.0311	0.6982	0.5807	7.7147	0.6337	5.5198	2.1648	2.3382	0.5809	0.6653	1.0201	2.0372	0.9493	3.1032	1.8623	1.4771	6.6586	1.6879	1.246	0.489	0.8937	5.4224	2.2508	5.3072	4.5602	0.2605	2.3175	1.2015	0.4107	0.9205	0.8244	1.0984	2.202	1.2393
DDX11-AS1	0.1477	0.0622	0.1721	0.0663	0.1402	0.4757	0.1056	0.1002	0.0409	0.4862	0.1252	0.3966	0.697	0.6103	0.415	0.8998	1.4122	0.2025	1.2198	0.0608	0.2242	0.6865	1.3638	4.2341	1.0108	0.2684	0.7349	0.7284	0.1107	0.5511	2.9252	0.4301	1.2411	0.8195	0.6096	2.1616	0.7213	0.5071	1.7784	0.4589	0.7722	1.5472	0.8999	0.3151	1.5061	0.1825	0.5586	1.0187	0.4059
AC074117.1	4.4933	1.8256	3.3518	2.9314	2.001	10.1123	3.8366	4.9746	1.1827	9.4469	3.5296	7.5063	4.1301	8.9672	7.8031	17.6025	10.0032	5.6045	6.1546	2.2287	18.2712	8.2482	8.8424	19.3064	9.5707	11.3272	7.7529	6.1521	5.2455	6.0117	34.5041	8.0351	11.0196	5.5692	9.1359	12.7441	8.2655	7.3348	10.7944	3.8452	5.1845	15.9574	18.022	7.3728	7.0345	3.3038	4.436	28.4726	5.2624
AC017074.1	0.9506	0.1735	0.9993	0.5543	0.8883	5.1391	4.2044	1.2413	0.2849	5.0453	1.3962	4.0208	1.4218	1.2348	2.9579	1.2692	2.9698	2.8229	0.7249	1.2102	0.8682	2.3925	4.4657	3.7277	2.7752	9.196	4.634	3.1024	2.0583	1.9206	6.7247	0.8175	2.1062	2.3798	8.3674	0.6234	3.4971	1.1463	1.2823	0.7329	4.2423	2.7361	10.3261	11.7136	6.8048	0.7631	2.8004	3.7232	1.1315
AC073389.1	1.4533	0.6733	0.7522	1.3037	0.7522	2.1057	0.5192	1.2044	0.4523	2.8695	0.1232	0.7093	1.296	1.2102	2.0409	2.4234	1.3772	1.8426	1.5347	0.7259	1.4091	1.0348	2.1609	5.7724	1.406	3.0796	2.5243	2.1229	0.6808	1.7067	15.4413	1.4102	2.0701	0.6157	0.9226	1.6863	0.5655	0.9437	1.3874	0.8463	0.9383	2.2147	5.5055	1.679	1.1238	1.0769	1.0122	3.8493	1.1977
LINC02340	0.2833	0.2216	0.3404	0	0.0454	1.5669	0.0537	0.2378	0.1456	0.4232	0.0892	0.214	0.2422	0.1402	3.1569	0.4577	0.8671	0.0721	0.0337	0.0618	1.4638	1.3013	0.7171	0.7936	0.1454	0.4778	0.2908	1.6332	0.0329	0.2908	0.6544	3.2952	0.1537	0.0405	2.004	0.2654	0.1861	0.3905	0.3931	0.817	4.3027	0.6168	0.3908	0.0935	0.2589	0.2599	0.4537	13.9352	0.9085
AC007823.1	0.9648	0.4351	0.525	0.4964	0.2546	1.3659	0.5272	0.4725	0.2806	0.5125	0.594	0.5101	0.9338	0.8847	0.7064	0.5884	0.4256	0.4551	1.3929	0.6287	1.0263	3.0966	0.6171	1.0757	0.3569	0.8934	0.6116	0.4041	1.0369	1.3251	2.0267	1.5945	0.7815	2.0745	0.4918	2.7543	5.0373	1.1293	0.7043	0.8593	0.6351	3.4595	0.548	0.295	0.6483	0.5467	1.0277	1.0236	0.2606
AC146507.3	0.399	0.437	0.7627	0.6346	0.2441	2.6951	0.6739	0.7816	0.3914	0.2069	0.7193	0.7289	0.9767	0.9739	0.5418	1.2992	0.8938	1.616	0.5131	0.4434	0.7554	2.2267	3.8857	3.9833	1.7924	0.6781	0.4468	1.8944	0.1473	0.9447	0.5377	1.9968	1.0679	1.1988	1.6166	1.4275	0.3337	0.5687	1.5268	1.0985	2.0588	5.1227	0.1401	0.5448	2.6522	0.6989	0.4066	4.5204	0.7773
SOCAR	0.2472	0.0541	0.0416	0	0	0.7241	0	0.0484	0	0	0	0.2614	1.183	0.0428	0.4512	0.6988	0.053	0.2202	0.2467	0	0.3792	1.0114	0.1592	0.3877	0.6661	0.1945	0.2029	0.4107	0.3211	0.6659	0.333	0.4535	0.2816	0.1485	0.204	0.3242	0.591	0.1788	0.0533	0.6652	0.3951	0.1507	0.0955	0.514	0.3162	1.7459	0.2131	0.8105	0.8574
EWSAT1	0.174	0	0.0523	0.029	0.3205	0.182	0	0.0365	0.0223	0.0236	0.0411	0.0263	0.0093	1.3668	0.0516	0.0351	0.0932	0.0664	0.2378	0.0475	0	0.5448	0.01	0.0975	0.0558	0.0856	0.102	0.059	0.0303	0.0558	0.0837	0.0998	0.059	1.1449	0.4307	0.2608	0.0343	0.0599	0.2548	0.23	0.0497	0.6186	0.12	1.5361	0.0341	0.1064	0.0857	0.0543	0.038
AC068014.1	0	0	0	0	0	1.4637	0	0	0	0	0.1185	0	0	0.2796	0.0893	0.1014	0	0.0959	0	0.2466	0.2359	0	0.0867	0.1407	0.8699	0.3176	0.1104	0	0.0874	0.3865	0.29	0.1234	0.2044	0.2155	0.0888	0.4234	0.099	0.1298	0.1161	0.4525	0.172	0.1093	0	0.1243	0.295	0.1152	0	0.1176	0
AL358472.5	0.7716	0.2689	0.7669	0.7362	0.1573	1.1377	0.4654	0.5496	0.0631	0.5001	0.5409	0.5934	0.7345	1.1239	0.844	0.2645	0.526	1.1249	0.5836	0.1608	0.9226	0.7518	0.9886	2.9801	2.7412	0.9662	1.1879	1.0823	0.057	0.9449	1.2288	1.0859	1.3989	0.2459	1.4472	1.5182	0.5161	0.6344	1.5519	0.4425	0.7289	0.8195	1.6595	0.5268	1.1539	0.488	0.2419	1.3418	0.9662
AC107959.2	0.118	0	0.0992	0.0393	0.0189	0.4587	0.0224	0.033	0	0.016	0.0557	0.107	0.0126	0.073	0.1119	0.2542	0.0181	0.03	0.4348	0.0644	0.7206	0.2135	0.0136	1.0137	0.106	1.3434	0.0519	0.06	0.1232	0.2271	0.0682	0.2127	0.048	0.1013	0.1391	0.5307	0.1395	0	0.0364	0.2127	0.0404	0.0685	0.0163	0.1948	0.077	0.0902	0.1018	0.129	0.1032
SNHG30	8.2242	2.5034	3.3763	4.3891	2.0947	6.1553	4.8831	3.331	2.2558	8.1097	2.7027	12.7065	10.3001	12.5549	10.8961	5.6754	7.7346	14.4306	27.2297	2.1084	7.1193	10.8106	17.8047	12.5362	11.3952	8.8592	18.0546	20.8782	6.5875	15.3719	15.6655	15.9206	8.1803	3.6852	6.833	15.7604	24.7439	17.1123	36.2833	9.3798	11.0976	20.3924	24.0666	11.1115	12.637	6.1469	13.7743	16.486	8.6473
SOCS2-AS1	8.1252	1.83	2.1544	3.6525	0.1795	0.4084	0.5709	2.842	1.7903	0.3805	1.9952	0.455	0.5463	0.6153	1.9015	0.547	0.0858	0.2674	1.8814	0.237	1.0857	1.5014	1.3781	0.2485	5.8339	0.1575	1.1502	0.9857	0.0975	0.3864	0.3101	1.9736	1.2448	0.5211	1.3708	0.315	1.0308	0.7964	0.2808	0.3114	0.216	0.8641	0.1063	0.9942	1.6552	0.5783	0.1381	0.9953	1.0312
LINC01002	0.8111	0.2514	0.399	0.5652	1.8192	0.9929	0.7108	0.8094	0.1284	1.0184	0.4215	2.1363	0.4884	2.5625	0.5545	1.452	1.2787	0.2636	1.3709	2.2408	3.2373	3.4295	1.06	2.9542	1.4711	1.601	0.5602	0.4057	0.6214	3.7199	1.1343	0.234	0.6879	1.6399	1.1493	2.1947	4.5137	2.9837	3.5784	2.021	0.7666	7.2039	1.0936	1.5913	0.7459	0.4477	0.5806	2.8885	1.5407
AP000446.1	0.109	0.8187	0.7729	0.1272	0.0873	0.2608	0.0827	0.3356	0.3081	0.2073	0.2231	0.0329	0.1048	0.1484	0.0388	0.1028	0.267	0.0971	0.0648	0.0833	0.0341	0.1518	0.1129	0.5701	0.056	0.0613	0.0799	0.037	0.0506	0.056	1.3433	0.1786	0.1775	0.0468	0.2057	0	0.0143	0.0376	0.084	0.1703	0.137	0.1899	0.0451	0	0.6263	0.1	0.0403	0.2724	0.0477
AC004080.2	0.0799	0	0	0	0	3.429	0	0	0	6.6862	0	4.4796	1.0162	0.3461	1.1275	0.452	0	2.9907	0.133	0	0	0.0779	2.0598	1.0448	8.1852	4.4821	0	0.664	0	0.0718	0.1077	1.4664	1.7456	0.08	25.7236	0.4193	0.5881	0.0964	0.1725	0	3.7693	0.2436	1.0805	3.2317	17.2381	0	4.0661	0.8736	0.897
LINC02541	0.1291	0.5454	0.7447	0.3442	4.0339	1.6793	5.9236	1.1562	0.398	1.8062	0.7316	3.8625	1.8625	7.1092	0.6123	8.3452	0.4545	0.6245	24.2638	7.0882	31.4384	13.6773	1.3222	4.7262	0.2983	1.1797	0.8898	1.2698	2.8909	4.5721	0.1243	11.5921	1.2437	4.6737	1.5528	2.7341	11.8935	24.0697	10.6106	13.7163	0.118	9.3141	0.8372	0.4688	0.7923	1.4018	0.4772	0.7057	1.7316
AC145423.2	1.9031	0.3126	1.2805	0.7768	0.6403	4.9786	0.8839	1.6775	0.77	0.8141	1.1531	0.805	1.9927	2.4723	1.0265	1.5246	1.1213	0.763	1.0292	1.1631	3.6502	2.0397	0.3065	6.8414	3.5903	0.1872	1.3673	1.807	0.8499	2.5636	4.4879	3.4918	1.9879	2.9541	1.4135	1.7474	1.4879	2.0655	2.1565	1.6008	0.6085	4.3503	1.1026	1.2093	5.3048	0.9166	0.6564	3.9525	1.3593
AL034422.1	0.033	0.0361	0	0.1154	0.037	3.314	0.0438	0.0646	0	0.2509	0.109	0.4187	0.2221	0.1714	0.6844	0.1555	0.0353	0	0.247	0.0504	0.1446	0.3857	0.5314	0.9919	0.5038	0.1298	0.3047	0.1175	0.1339	0.2666	1.467	0.1135	1.0025	0.2313	0.7623	0.3895	0.1821	0.2785	0.178	0.1387	0.2901	0.2681	1.561	1.1815	1.1758	0.3178	0.5689	0.1082	0.1683
AC069148.1	0.2893	0.1901	0.3406	0.2699	0.0649	0.8477	0.0768	0.17	0	0.165	0	0.2448	0.4328	1.6537	0.8163	0.818	0.2479	0.0516	3.9956	0.3978	0.8878	0.2255	0.0932	4.9164	0.7277	0.5123	0.3563	0.3434	0.141	2.0785	0.3119	1.6588	0.2198	1.1589	0.0478	3.4153	0.8515	1.5351	2.81	0.6814	0.0463	4.0561	3.2407	1.4706	0.1586	0.1239	0.1497	0.6325	0.059
AP001160.3	0.9319	0.2551	0.7347	0.3396	0.4572	0.9142	1.4684	0.3422	0.4189	0.8859	0.385	0.8623	0.5663	1.7654	1.5465	1.0978	0.9982	1.5567	1.4537	0.7564	1.149	0.7377	2.7205	2.3601	1.308	1.7763	1.3748	1.7281	1.3242	1.7783	4.7089	2.2708	0.6084	1.1082	0.769	3.7433	0.8035	0.3512	3.4569	2.0575	2.6071	1.7751	0.8436	0.8747	0.8516	0.6857	1.0044	1.7189	0.6537
AP001372.2	3.9929	2.8695	3.1182	2.6816	2.059	8.636	2.862	3.6835	3.1251	18.8433	2.8866	4.279	8.9854	3.5352	12.0255	5.3424	6.2439	3.3032	4.5083	2.6553	2.3639	9.1699	8.0249	6.4777	7.366	4.4193	10.0621	1.9463	1.6935	4.8023	13.235	7.4404	6.5168	2.1599	14.1954	2.6888	7.3285	5.2235	2.6354	5.9524	46.0936	6.3745	5.8867	10.4819	8.8294	3.7013	7.516	6.7221	2.5281
AC145098.1	3.7885	0.2243	0.6028	1.1941	0.5741	1.6072	1.7663	2.0056	1.1047	0.292	1.0152	0.9745	6.3561	0.8868	2.7189	5.0182	1.0968	1.8245	0.5963	1.0168	5.7233	4.7886	10.0605	3.3462	2.1156	2.3169	3.2578	9.7219	0.6651	3.77	1.1038	4.5793	2.917	1.5381	1.521	0.8058	2.166	1.6052	1.6575	4.5647	4.8289	4.265	2.3729	13.3669	3.743	7.4523	4.1496	6.2676	7.4176
LINC02367	0.1811	0.0921	0.3481	0.0528	0.0363	0.9812	0.1115	0.2787	0.0233	0.0738	0.0784	0.4377	0.4063	0.2576	0.3273	0.2925	1.2469	0.2016	0.581	0.163	0.2339	1.9027	0.3021	3.4404	0.5983	0.1781	0.292	0.5756	0.0263	0.5168	0.5228	0.482	0.6693	2.7069	0.1387	2.0187	0.7554	0.156	1.8842	0.5548	0.6771	0.5518	0.3996	0.3586	0.3841	0.3322	0.1617	1.9014	0.2309
AC139887.4	5.5007	2.4366	4.4703	4.0363	1.5942	5.1092	1.3942	6.1136	1.667	5.6405	3.7448	3.6601	4.2989	2.034	4.7184	1.5728	0.5959	2.4779	0.7713	1.1331	7.2481	4.3357	7.1678	16.5623	2.2209	0.7905	1.6493	4.2545	0.6524	2.1091	5.83	0.567	1.8194	2.909	6.8857	3.3238	1.0801	0.3727	1.6675	2.3394	4.644	2.1977	1.1936	9.7108	3.7844	2.3153	1.279	3.0401	2.5225
LNCTAM34A	0.6434	0.0909	0.5237	0.1936	0.8147	1.4334	1.2118	0.5285	0.1866	0.6117	0.4344	2.1071	1.4902	3.6311	0.9128	1.3498	0.4224	0.8136	2.9183	1.8393	2.0474	4.0647	1.2871	3.4729	1.212	0.3267	1.2142	1.4534	1.4663	3.3364	6.0134	0.9759	1.5177	1.4134	1.3018	1.8785	4.009	2.2277	4.0542	1.1872	2.2398	1.7502	0.8418	1.9423	0.8915	0.8664	0.5548	0.6353	0.953
AC010336.7	0.2485	0.2268	0.3135	0.3381	0	1.2134	0.4396	0.365	0.0372	0.315	0.2737	0.3504	0.4027	0.5021	0.9279	0.6636	0.2662	1.07	0.8269	0.0316	1.4979	0.4035	1.0006	0.1083	1.265	0.3667	0.6376	0.5407	0.2354	0.8182	4.8553	0.5699	0.8259	0.4562	0.2734	0.2173	0.6095	1.0988	1.0727	0.3484	1.258	0.589	1.0798	0.9091	0.6056	0.1773	0.1786	1.2223	0.169
EIF2AK3-DT	0.7678	0.5908	0.8028	0.726	0.3142	1.0314	0.3717	1.0568	0.4664	2.5743	0.6058	1.174	1.2416	0.611	1.5584	2.21	0.8225	0.5916	0.9927	0.3567	0.7619	1.1929	2.1642	5.0725	0.494	1.327	1.1927	1.0344	0.5897	1.9008	3.8868	3.8073	0.8572	0.6961	1.1816	2.0278	1.2597	1.5765	1.1869	0.7331	0.904	3.0252	3.8472	3.1645	1.3559	0.8107	0.4294	4.7179	0.614
AC125437.1	1.9294	0.8179	0.5234	0.9436	0.4886	0.5861	1.4866	0.4876	0.3917	1.065	0.2057	1.7112	2.9791	0.8624	0.9296	1.4665	0.6667	1.7744	2.3301	0.523	1.7053	0.4245	3.0075	2.5221	0.9505	1.8982	0.511	0.8864	0.657	0.7825	3.6063	2.1411	0.1773	1.3712	1.3354	3.7552	2.0035	1.1258	1.209	2.3558	0.7462	8.5993	1.2621	0.2157	0.455	0.5995	1.0733	1.2926	0.8891
LENG8-AS1	6.4706	2.8695	5.172	5.4568	2.8486	13.9333	3.406	6.0752	1.5626	11.5652	3.7998	6.7012	13.4182	4.8396	10.8052	6.1236	4.2962	12.7444	5.5613	2.7166	13.3629	4.7152	15.3966	23.1379	7.7824	11.5481	5.2963	6.8545	2.0626	5.4986	20.393	12.4791	8.3534	4.0699	10.0839	5.1203	4.2053	4.5464	11.513	6.2523	5.1294	18.9332	13.0901	7.2591	13.9282	5.8381	4.588	16.2791	8.0753
AC073073.2	3.0338	1.1703	1.2178	1.1458	1.1212	1.912	1.8527	1.3674	0.6044	1.4912	1.9559	1.3489	1.5986	1.5227	2.2886	2.5019	1.9203	1.2132	3.6856	1.6197	3.4762	3.023	2.7487	4.9797	2.8648	1.4924	3.6621	1.3707	1.9736	2.9876	2.8106	1.7197	1.3259	4.8334	3.6417	4.2958	4.5819	1.1433	3.9623	6.8726	3.3895	3.7301	1.6146	0.6572	1.4493	0.8302	1.8133	10.4949	1.0905
AL353746.1	0.0581	0.983	1.6023	0.7682	0.0072	0.0338	0	0.5566	0.5632	0	0.8751	0.0137	0.0048	0.028	0.0161	0.0304	0	0.0058	0	0.0641	0.0071	0.5348	1.2431	6.9731	0.0058	0.0191	0.0066	0.0077	0.2202	0.1624	0.0435	0.0444	0.0184	0.0388	0.0053	0.3727	0.095	0.0779	0.007	0.1358	0.031	0.164	0.0062	0.0075	0.0059	0.0415	0	0.0212	0.0395
AC091153.3	0.0941	0.7217	0.6334	0.1098	0	1.3792	0.4997	0.1844	0.1693	0.358	0.2074	0.7965	0.2817	0.5708	0.625	2.2184	0.3026	2.9358	2.5065	0.1438	0	0.0917	3.867	2.0922	0.6766	0.4631	1.1595	1.2291	0.4587	0.2536	5.9628	2.2672	1.3411	0.2828	0.4662	3.3343	1.3855	0.6812	5.7914	1.5838	0.4515	1.1478	1.0909	0.4351	2.065	0.1008	0.0812	4.9397	0.0961
AP003352.1	2.3683	0.3915	0.9771	0.9901	0.5763	1.1689	0.9487	1.2472	0.4419	0.892	0.9353	0.9687	2.6234	2.438	2.3545	3.2849	1.9864	9.6937	3.29	0.6656	2.3997	2.6992	5.7939	3.4754	5.7202	1.2969	0.8484	2.413	0.9615	4.0729	8.1589	4.1761	2.4611	2.573	2.8394	4.5716	1.8289	2.1285	6.7269	4.3035	2.2859	2.2244	1.9417	1.3938	3.8999	1.4348	2.0036	3.1015	2.6216
MMP25-AS1	2.0052	0.8864	1.7431	1.1513	0.7014	3.42	0.7486	2.0118	0.3749	0.6237	0.7971	1.5239	6.1224	2.5809	2.8291	4.5367	0.4204	1.9831	2.0865	1.1477	3.2595	6.2552	4.8446	6.14	4.6933	0.9713	2.4985	7.9181	0.3585	3.2544	5.8254	4.662	2.0147	2.8677	3.1324	5.1878	3.7956	2.8248	7.6961	2.7543	2.9409	4.2237	0.9	2.9187	2.6899	5.5984	0.9835	7.0311	2.2399
AL592211.1	1.52	0.2937	0.9776	0.9385	0.9024	6.2686	0.4746	0.7005	0.1608	1.02	1.182	2.0802	2.8086	1.3938	3.7098	0.7584	1.3409	2.5491	0.1488	0.5464	0.784	2.265	4.3206	1.4026	2.8113	1.7593	5.8731	0.9551	0.726	2.5694	1.8073	1.3329	1.1887	0.7163	1.6971	1.1728	0.9046	1.0783	0.8684	0.9025	74.1159	0.8175	0.8634	1.1363	1.716	2.2011	0.9252	1.6615	1.0948
AC012313.8	0.1398	0.0811	0.1315	0.1823	0.2122	1.1535	0.4148	0.1531	0.037	0.5318	0.0906	0.174	0.283	0.9903	1.1263	0.2326	0.5111	0.2125	1.1703	0.1822	0.7393	0.8977	0.4704	0.5484	0.6799	0.4775	0.4053	0.5858	0.1269	0.1034	0.5653	0.7547	0.3281	0.4531	1.1066	0.8632	0.855	0.1786	1.0387	0.8442	0.0986	1.4793	0.2701	0.2946	0.4887	0.0616	0.4327	0.7104	0.1091
LINC01697	2.2755	0.1797	0.138	2.7175	1.7176	0.4465	2.8453	0.5464	0.1475	0.104	0.4459	0.3239	0.18	4.4246	0.0817	0.0412	0.0117	0	0.2731	2.7077	0.06	1.0552	0.0176	0.2717	0.0197	0.0538	0.0112	0.2077	0	3.5368	1.1941	0.1882	0.0104	0.0219	0.0271	0.0717	1.8313	1.161	2.5147	0.0736	0.0787	0.5335	0.0528	0.1011	0.04	0.4332	0.2075	0.5262	0.0446
LINC02043	0.1213	0.0266	0.102	0	0.0272	1.0914	0.3541	0.0713	0	0	0.0802	0.2309	0.4535	0.4832	0.2415	0.5944	0.1559	0.1297	1.2512	0.0371	0.5583	0.6145	0.1758	0.5073	0.3922	0.5966	0	1.0076	0.4136	0.5881	0.3269	0.2503	0.2534	0.0729	0.1201	0.6363	0.4685	1.6674	0.5497	0.2856	0.0776	2.2918	0.0937	0.5044	0.6207	0	0.0627	1.8295	0.0247
PRANCR	0.3392	0.1684	0.2586	0.2215	0.1623	0.5915	0.186	0.248	0.0895	0.3224	0.1744	0.22	0.9505	0.2311	0.7768	0.439	0.3343	0.2659	0.3311	0.2004	0.3123	0.7799	1.2748	1.3361	0.4672	0.3604	0.4038	0.4401	0.415	0.4346	0.6216	0.3527	0.4209	0.1947	0.4553	0.7593	1.2895	0.1418	0.9371	0.3994	2.0533	3.6573	0.3756	0.1567	0.529	0.4211	0.3159	0.6525	0.3461
AC024581.1	0	0	0	0	0	0.5751	0.1042	0	0	0.5225	0	0.083	0.2936	0.068	0	1.406	1.9344	0	2.0902	0	4.4746	4.1308	0.3794	0.3079	0	0.2317	0	0.6523	2.4226	2.0447	0.2116	0.9904	0	1.4152	0	1.5447	4.6216	4.0713	0.7626	0.7925	0.1255	4.8656	0	2.6304	0.2153	0	0	0.3433	0.3204
AL390719.3	0.9334	0.6222	0.9215	0.8992	0.4551	4.7562	0.5924	1.0334	0.6933	1.2346	1.3859	2.8754	1.7604	0.4218	2.8625	0.8415	1.4346	3.2541	0.6415	0.8991	3.0246	2.0956	1.8957	6.6312	3.9374	0.7985	1.4995	1.6376	0.6591	0.984	5.7968	0.5119	2.1581	1.585	1.976	1.6502	0.5599	0.2447	1.0073	1.0923	13.0407	1.1132	0.1176	0.9377	1.0756	0.4344	0.6649	2.9721	1.0352
AL109984.1	0.9875	0.8411	0.8305	0.6398	0.4922	3.3296	3.3487	0.6448	0.1973	2.6077	0.4835	1.1603	2.1336	6.4618	1.73	2.7922	1.6455	1.5641	5.2946	1.1735	5.2913	4.5969	0.3535	7.315	1.4785	1.4034	0.7883	0.6511	0.6237	7.4887	8.5757	5.2846	1.5629	4.2853	2.2637	4.4615	9.7892	2.3818	2.8419	1.3844	1.1402	19.1733	0.5298	1.0141	2.1058	0.5872	0.7569	1.799	0.4478
AP001625.3	0.1979	0	0	0	0	0	0	0.0969	0	0	0	0	0.148	0	0.0821	0.1866	0	0.0882	0	0.0756	0	0	0.0797	0	0.5335	0.4869	0.5079	0.2349	0	0.0889	0.1334	0.3405	0.4699	0	0.3267	0	0	0.2387	0.3204	0	0.2373	0	0.2867	0	0.2713	0	0.256	0.2164	0.202
SCAT2	0.786	0.7283	1.4746	0.9871	0.7458	2.9735	1.5243	1.4211	0.761	0.6897	1.3321	1.4705	2.2609	2.461	1.7058	1.4246	2.7849	5.8713	1.6599	0.6466	3.7771	3.77	4.9666	4.5839	4.6167	1.0707	2.7924	3.8031	1.031	0.923	14.9094	8.3891	3.4448	1.332	0.9979	8.3268	2.5024	2.7706	9.4608	4.2718	6.1377	3.9925	2.6856	1.8161	3.5915	2.4591	1.9289	5.2209	2.2825
PTOV1-AS2	5.039	1.7601	4.1283	4.2553	1.1204	5.8637	2.1904	5.7858	1.445	1.1976	3.6848	4.1343	10.3962	3.5363	5.1186	4.872	2.6058	4.4119	2.4214	2.8206	9.6647	5.629	12.4894	17.7164	10.107	7.1798	5.7512	9.3316	1.7284	4.096	6.1462	4.9813	6.1875	5.6551	7.5998	4.5012	4.7145	3.0383	11.0633	4.5673	7.014	6.2667	3.8171	3.9646	6.5106	5.7188	5.3937	6.8849	9.5293
AC020612.3	1.0135	0.3415	1.0491	0.1818	0.7869	2.7737	0.3104	0.9926	0.1402	0.9635	1.1165	0.3298	0.9329	0.7427	1.0998	0.2204	0.3341	2.7089	0.454	0.3573	3.6742	2.7345	2.1976	4.6879	3.782	1.3039	1.0402	1.2029	0.1899	1.2602	3.1517	0.5364	2.0729	1.5615	1.2868	1.6361	1.0039	0.188	1.262	0.9836	1.0594	5.9403	0.527	1.7113	3.3487	0.5007	0.8739	4.6018	1.8296
NIPBL-DT	10.5925	1.2553	3.3501	5.086	1.659	1.9434	2.8893	3.9827	1.14	2.423	2.6527	5.1673	4.0856	4.5424	5.7128	8.3475	1.8042	2.7216	2.014	1.7563	4.7799	5.6219	13.1211	21.2467	5.6438	1.9847	3.5296	7.4715	1.8929	6.9991	12.2456	10.6118	5.68	6.394	2.7376	7.8708	8.3229	7.414	10.7952	5.3975	3.179	15.1594	7.5197	8.1458	4.9455	3.9276	2.1039	11.7883	2.091
AL109659.2	0.7433	0.5233	0.4242	0.6501	0.2084	1.6945	0.1057	0.468	0.0955	0.8328	0.5264	0.2807	0.9728	0.115	0.2643	0.1001	0.0284	0.4494	0	0.1217	0.0291	0.2328	0.4062	3.0537	0.4054	0.5746	0.109	0.2836	0.0862	0.0715	0	0.0304	0.2521	0.2924	0.701	0.3482	0.0244	0.032	0.1719	0.201	0.2334	0.1618	0.0769	0.092	1.0432	0.0568	0.2747	1.5959	0.2438
AC083855.2	8.7988	0.8759	0.8222	2.2802	2.0432	15.1591	4.7173	2.1326	1.6381	17.9118	2.154	9.3987	6.6139	2.1937	19.544	6.1986	9.9013	3.9591	1.9225	1.5276	4.9191	7.1439	9.0189	1.975	16.0082	5.4213	14.2755	11.7086	12.449	5.2677	3.8324	6.5227	22.5763	5.5627	22.3703	1.7486	5.5586	2.5723	3.9804	4.934	48.5576	3.07	12.5728	13.7074	5.1171	5.232	12.3384	11.3664	16.9124
AC105052.5	3.4925	1.8212	1.3428	1.3577	0.0746	0.9746	0.3531	3.6485	1.2859	0.0316	0.6596	0.2462	1.2438	0.1728	0.3036	0.5329	0.1425	0.1482	0.6365	0.0762	0.0729	0.875	1.8216	12.8701	0.4482	0.3272	0	5.8031	0.108	0.239	7.2611	0.8773	1.8004	4.8965	0.3568	7.5041	0.2142	0.4813	0.3949	2.574	0.0266	1.4869	1.0599	0.0769	1.5199	0.2136	0	2.6541	0.2376
AC007128.1	0	0	0.2622	0	0.0269	3.9398	0.1273	0	0	0.2508	0.0528	3.7788	1.8295	1.5992	1.1343	0.8589	3.4167	0.7692	1.7358	0.0183	7.2281	3.3647	4.4616	5.1099	4.0718	4.2705	1.9198	2.1347	0.7984	1.0122	8.6931	1.8976	2.0724	0.8165	2.9093	2.5479	0	2.8342	1.1129	1.7953	2.7413	6.7975	1.8526	9.1429	2.6958	0.0257	0.9926	8.7292	0.8075
AC018695.9	0.2005	0.1951	0.1873	0.2078	0.2498	0.9323	5.2021	0.4363	0.0801	0.3812	0.0245	0.1178	0.2166	2.1413	0.2588	1.6165	0.4295	0.2183	0.7413	0.6466	4.9559	1.3456	0.0897	1.8635	0.5403	0.5698	0.1143	1.3747	2.5865	2.3404	0.3302	0.2554	0.3807	0.6469	0.1287	0.409	2.3356	3.116	1.6346	0.2623	0.1424	2.2403	0.3011	0.3345	0.3257	0.0715	0.1921	0.2922	0.5227
USP2-AS1	0.589	0.0957	0.0774	0.4991	0.16	1.0449	0.055	0.0766	0.0165	0.3237	0.0355	0.2822	0.2134	0.0917	0.7446	0.5335	0.0739	0.738	0.7887	0.1512	0.2118	0.4752	0.0519	0.7639	0.7482	0.5523	0.5951	0.2185	0.2466	0.2108	3.2555	1.3403	1.2847	0.235	0.4823	1.5814	1.02	0.6382	0.1937	0.3135	0.1729	1.2529	0.431	0.3296	0.8663	0.2069	0.2976	1.1569	0.3146
AC008883.3	0.148	0.0405	0.0778	0.151	0.1452	0.7744	0.0491	0.1631	0.0333	0.2638	0.163	0.0978	0.0692	0.1602	0.2303	2.9991	0.2774	0.511	1.4007	0.1413	1.6627	0.8111	0.2384	0.3386	0.0997	0.0364	0.057	0.1757	0.1352	0.1661	0.9473	0.2758	0.4392	0.1112	0.4428	0.4125	0.1021	0.2231	0.7986	0.4046	0.1775	3.0636	0.2144	0.0855	0.1353	0	0.1755	0.5662	0.1321
AC109479.1	0.2136	0	0.1198	0	0	1.1923	0	0.0697	0	0	0	0	0.7989	0.0617	0.0591	0.537	0.0763	0.2538	0.474	0.0544	0.0781	0.0694	0.1147	0.0931	0.3199	0.1401	0.2924	0.2536	0.0578	0.1919	0	0.3267	0	0.2139	0.1175	0	0.1965	0.1718	0.2306	0.2995	0.0569	0	0	0.2468	0.0651	0.3049	0.0614	0	0.218
AC021205.3	0.8423	0.2904	0.8658	0.7276	0.3498	0.7345	0.1656	0.5194	0.1543	0.9935	0.3093	0.099	0.4666	0.2837	0.5436	0.0588	0.0835	0.1807	0.2076	0.1549	0.188	0.8358	0.201	2.671	0.4064	0.0614	0.0961	1.0367	0.1013	0.2241	0.3994	0.161	0.1481	0.3436	0.7208	1.0025	0.373	0.1129	0.0842	0.223	0.0997	1.3311	0.0753	0.0901	0.2993	0.2504	0.4707	0.341	0.1273
STAM-AS1	0.0342	0.3	0.3168	0.3595	0.0576	0.9139	0.0909	0.5367	0.077	0.293	0.283	0.2716	0.1793	0.1631	0.4263	0.1937	0.4036	0.3051	0.2564	0.1701	0.7507	0.5673	1.0206	1.3207	0.3231	0.2022	0.2812	0.3455	0.1669	0.5229	1.7307	0.3142	0.3903	0.4459	0.2402	0.5391	0.5513	0.3717	0.2587	0.677	0.1369	0.9743	0.4961	0.1583	0.8608	0.2383	0.4577	1.3103	0.2796
AC104461.1	0.0327	0.0119	0.0092	0.0127	0	0.5366	0	0.0321	0.0098	0.0207	0.012	0.0692	0.0571	0.1417	0.0453	0.0823	0	0.0194	0.0182	0	0.0359	0.5209	0.0264	0.0713	0.0784	0.2147	0.0224	0.0388	0.0266	0.0294	0.1029	3.7659	0.1347	0.0109	0.5672	0.1431	0.0301	0.0526	0.0824	0.0367	0.0174	0.0111	0.158	1.7646	0.0598	0.0701	0.047	0.8467	0.1002
AC010536.1	0.5446	0.2237	0.2147	0.7145	0.0954	0.4987	0.6323	0.3667	0.1224	0.356	0.375	0.18	2.0621	0.1327	0.918	1.3635	1.0574	1.1069	0.2407	0.299	1.2311	0.4146	2.9196	0.9344	3.3637	1.6075	0.6812	2.0402	0.2349	0.2445	1.8348	1.1515	1.0667	0.5284	1.2079	1.1832	0.2818	1.252	1.0837	0.4438	1.4013	1.6945	0.7231	1.0224	0.731	1.0383	2.0399	2.158	0.5731
AL121832.2	1.8627	2.1855	3.5807	2.6377	1.4175	5.1512	3.884	3.453	1.4355	2.8458	2.9315	3.9396	4.03	4.6091	8.2804	12.6024	28.0056	13.7502	16.4378	3.5065	7.4369	3.6297	10.0724	17.9138	8.1873	4.4505	6.5545	8.4481	6.9683	6.5117	17.8391	25.8609	8.5913	3.331	5.3252	9.6855	5.0784	6.7388	28.7165	7.5541	5.0517	7.9074	19.3355	9.9142	8.8154	5.981	3.958	13.6706	4.955
AL139288.1	2.7488	0.301	1.1559	1.0685	0.411	5.6567	0.9726	1.9742	0.8238	3.7454	1.2113	2.3255	1.9873	3.0154	4.79	2.3316	0.7852	1.7959	2.1344	1.1899	9.8413	5.8919	1.9186	8.2643	4.6094	1.7127	2.6331	2.8274	0.1488	1.3165	13.5815	13.554	4.0894	1.9269	3.7807	3.2449	5.2249	1.6574	5.5372	3.9305	2.1972	6.6091	2.9197	2.6463	4.9404	1.2749	1.2641	11.0168	1.4958
GCC2-AS1	1.0567	0.3654	0.8887	0.2594	0.5613	2.3861	0.0738	0.2723	0.35	2.3792	0.3064	1.4116	0.7071	0.7707	1.8922	3.3548	1.3107	0.6937	3.1002	0.2974	5.9737	1.3547	0.8958	2.3992	6.0456	0.4925	1.7125	1.5182	0.2258	0.949	3.4475	1.5307	1.1619	2.2836	0.918	4.0853	0.9719	1.0061	1.5605	1.1228	1.1114	3.0512	1.826	2.6986	0.8641	0.6548	1.0071	3.4044	0.908
AC008764.8	0.6052	0.3582	0.4127	0.4006	0.3668	0.8557	0.2821	0.4805	0.1765	0.7308	0.3063	0.4843	2.0917	0.6799	0.9636	1.1099	0.5782	0.4809	0.6123	0.1749	2.0973	0.7968	1.2382	4.2546	0.6024	0.7402	0.554	1.1841	0.3851	0.8813	0.9918	1.1253	0.5902	0.6715	1.2013	0.4934	1.1433	1.1834	2.1357	0.5778	0.8759	1.3958	0.5528	0.6424	2.7802	0.9453	0.4372	1.7163	1.0013
TMED2-DT	0.6602	0.4644	1.106	0.6009	0.2167	5.1448	0.2493	1.4036	0.304	0.8623	0.5854	0.6301	1.0678	0.7159	1.4565	1.0067	0.6267	1.8507	0.6698	0.492	1.1825	0.9727	2.0879	3.8591	1.3357	0.734	0.7327	2.0195	0.3487	0.7905	4.9618	1.4834	1.1265	0.5536	1.2004	0.9997	0.6467	0.5114	0.9268	1.1513	0.532	1.1833	1.0729	1.7859	1.8052	0.8733	0.4675	3.7198	0.6627
AP001160.1	0.5228	0	0.342	0.4065	0.1303	2.9784	0.1542	0.1707	0.0522	0.3866	0.256	0.3071	0.8689	0.3522	0.2892	0.6022	0.3734	0.828	0.4833	0.2219	0.382	0.3962	0.421	1.139	0.4697	0.4572	0.5366	0.8273	0.1415	0.5217	1.0959	0.4663	0.3861	0.1745	0.2876	0.6857	0.374	0	1.1911	0.4397	1.068	0.5901	0	0.2013	0.3185	0.1865	0.2504	0.381	0.4149
PCBP2-OT1	0.7532	0	0.19	0.7027	0.0845	1.5763	0.4997	0.2213	0.1354	0	0.3319	0.1593	0.1127	0.7828	0.625	0.9228	0.5648	0.2684	0.1253	0.5178	0.5778	1.1741	0.5459	1.1815	1.6239	0.2223	0.4638	0.7151	0.4281	0.6087	0.9135	0.9501	1.0728	0.3771	1.6782	1.4819	1.1777	0.8175	0.6503	0.4435	0.8429	1.3773	0.1455	0.261	1.1013	0.1612	0.3897	1.1526	0.4611
AC092969.1	0.0138	0	0.0503	0.0375	0.0258	0.3513	0.0061	0.0405	0	0.0087	0.0101	0.0146	0.4299	0.0797	0.0076	0.2167	0	0.0287	0.0383	0.0176	0.0907	0.5198	1.8852	1.6592	0	0.1222	0.0189	0.0873	0.0224	0.8177	0.3099	0.2479	0.9345	0.2947	0.038	0.0784	0.5245	3.3053	1.4045	0.0967	0.0551	6.8259	0.0044	0.4888	0.0546	0.0148	0.0317	0.2111	0.0094
AC106052.1	0.0894	0	0.6016	0	0.1003	0.7485	0	0	0.3216	0	0.2955	1.0401	1.6718	0.1549	0	0.3371	0.0958	0.1593	0.2232	0.4098	0.098	0.3485	0.144	3.0389	0.241	0	0.2753	0.3184	0	0.4015	3.0122	2.8709	0.1698	0.1791	0.5903	0.3518	0.0822	0.2157	1.0614	0.6769	0.9291	0.4542	0	0	0.7354	0	0.6939	1.1728	0.0912
AC124016.1	0.6376	0.5371	1.0725	0.1716	0.22	1.2318	0.2603	0.8647	0.441	0.5595	0.3242	0.5187	1.6141	0.7646	0.407	1.8029	0.7881	1.9227	1.5915	0.4871	1.1289	0.8602	4.1082	4.0393	0.3084	0.6756	0.8055	2.5032	0.8762	0.7488	3.1065	1.1249	0.8384	0.3929	1.2548	3.8601	1.1729	0.8281	3.123	1.1139	0.7449	3.239	0.9473	0.6233	0.6276	0.42	1.2688	1.4476	1.0009
KTN1-AS1	0.9859	0.4319	0.3962	0.6196	0.6634	0.4986	1.192	0.3487	0.2068	1.2549	0.1931	0.5271	0.6514	3.4392	0.8863	3.8305	0.4694	0.3074	1.2213	0.7574	1.4108	1.7131	0.4941	1.2029	0.6397	0.8083	0.5228	0.6761	0.9207	1.21	4.03	2.1356	1.2483	0.4827	0.5831	1.6524	2.0252	0.5284	1.5723	1.0505	0.3984	3.695	0.7669	0.3227	0.6908	0.6039	0.4345	0.8681	0.4695
FIRRE	0.1389	0.1281	0.2213	0.1748	0.0164	1.0901	0.4608	0.2112	0.0493	1.668	0.1168	0.3904	0.9568	0.9624	0.5187	1.6227	0.6148	0.964	1.2469	0.0084	5.4085	1.7985	1.157	2.9004	0.22	1.0537	0.1801	1.2191	0.0534	1.1128	0.596	3.6971	1.5759	0.8456	0.6697	0.5226	0.4203	1.0095	6.497	0.2706	0.0497	5.5778	0.233	1.6258	0.0468	0.1213	0.1324	1.8699	0.4252
PEF1-AS1	0.9225	0.3074	0.2361	0.725	0.0675	1.7417	0.1064	0.4714	0.0721	0.286	0.2651	0.7634	0.9299	0.3126	1.4644	1.5309	0.2363	1.5901	0.1835	0.1838	0.8791	0.4885	1.1144	2.2282	1.4232	1.0456	0.5969	0.5712	0.3745	0.5403	0.3243	0.8968	0.876	0.5422	1.026	1.5256	1.3833	0.266	1.2119	0.894	0.2565	0.2852	0.1743	0.3243	1.7594	0.6224	0.2594	0.6138	0.4501
SNHG19	44.8283	18.071	22.7301	45.3077	111.618	36.1668	139.485	26.7237	15.5375	40.2684	23.1893	49.0546	66.6653	50.4139	158.068	191.778	98.5454	97.357	190.369	72.758	64.5118	52.1585	107.577	84.4165	110.774	28.5074	109.221	76.3363	123.129	54.0258	160.386	189.829	60.4601	56.8631	13.7254	215.085	217.746	82.578	457.971	54.7563	356.667	212.663	231.241	29.5722	63.6489	47.2854	63.8634	65.4757	46.6675
AC215522.2	0.5141	0.0313	0.2882	0.2664	0.4804	0.6276	1.2885	0.4196	0.0257	0.0271	0.0629	0.6946	0.7262	4.8231	0.5451	0.6191	0.6119	0.3053	1.782	0.9163	2.3789	5.6486	0.506	0.896	0.7184	0.8148	0.1466	0.2373	0.4638	3.2572	0.5003	0.0655	0.2441	0.3718	2.0505	0.6743	9.824	5.9582	3.6984	0.9609	0.4337	4.3812	2.675	5.312	0.1305	0.0917	0.4433	0.9053	0.4954
MIR600HG	3.5497	3.0171	4.3969	4.1829	6.7623	2.2768	4.5427	4.1601	1.8027	7.8927	3.8533	4.2486	3.6546	4.3669	2.6621	1.6448	4.0968	0.8733	1.3778	5.5652	1.0662	5.4121	2.0694	4.7761	4.363	1.1909	3.5975	3.0672	0.5548	4.4348	6.9249	1.1326	3.1311	5.3247	3.7261	3.9255	8.1963	4.6927	2.5244	1.6928	3.5141	14.991	1.0039	2.6853	5.0154	1.542	1.6905	3.9207	2.0004
AC007750.1	0.2245	0	0.009	0.0374	0	0.0671	0	0.0209	0.0384	0.0203	0.0824	0.0452	0.4397	0.0648	0.275	0.3526	0.0115	0.0667	0.1156	0.0327	0.1992	0.0729	0.0947	0.0419	0.1344	0.0526	0.0658	0.3299	0.0608	0.336	0.1873	0.3187	0.0305	0.0321	0.1147	0.4066	0.5998	0.1547	0.0923	0.3866	0.0427	0.0326	0.0206	0.0617	0.127	0.1373	0.0092	0.222	0.2618
CTBP1-DT	8.1035	3.1737	3.766	3.963	3.454	4.6798	7.0353	4.8419	2.1305	13.8619	3.03	4.5431	6.1838	7.2247	9.7706	7.4874	5.5942	1.9897	3.4749	3.6291	6.1659	8.5154	4.1739	25.5014	6.0443	3.6284	6.4155	4.6671	3.936	6.4096	7.4738	5.4869	15.4441	7.1191	14.6362	14.3111	8.002	4.2145	3.146	4.2636	10.5701	7.6841	11.2215	32.7529	6.1645	6.4959	4.9196	6.9259	4.8763
AL590004.3	0.1637	1.2063	0.9211	1.2772	0.0071	8.5426	0.0167	4.685	3.1182	2.8841	8.9104	0.5458	0.7767	0.0218	0.8357	0.1009	0.1888	2.0637	0.0209	0.0048	0.0138	0.0368	0.2078	0.1152	0.4863	7.4373	4.9291	0.8516	0	0.0678	0.0848	1.1549	0.269	0.0693	1.257	0.0413	0.0116	0	0.3804	0.0318	0.0906	0.0128	2.7533	11.0531	1.2655	0.539	0.2171	1.7957	4.6883
SP2-AS1	3.2306	0.6537	0.8121	1.8018	0.7088	1.3963	2.3531	1.4616	0.442	2.1364	1.0832	0.7984	1.9434	1.5206	5.0265	1.4231	1.6363	1.8458	3.5788	1.3681	4.195	2.9252	2.4746	4.1083	2.3659	4.0593	2.1624	3.3549	0.442	1.1825	3.7855	0.9866	3.9848	1.2132	6.6361	2.6945	2.3739	1.5456	1.6106	2.23	2.021	5.1372	2.0514	5.1115	3.145	2.443	1.5896	8.4827	1.7735
AP000866.2	2.1535	1.082	2.5143	2.1273	4.7448	2.8367	1.4792	2.0098	1.8223	2.9143	2.2049	2.2505	0.9474	0.6802	1.9762	0.4298	0.1628	1.3769	0.274	4.7998	0.5276	0.6418	1.3467	0.8942	3.414	1.9941	3.7184	1.4133	0.2674	0.6826	1.7412	1.6851	5.0764	1.4208	3.1362	0.2991	0.3262	0.4583	0.3281	0.4475	1.4379	1.3127	1.9572	3.5416	1.505	0.922	1.1141	1.4677	2.2231
AL161640.2	0	0	0	0	0.136	0	0.4829	0	0	0	0	0.171	0.0302	0.3852	0	0.6098	0.0866	0	1.0092	0.0927	0.2216	0.3152	0	0.3171	0	0	0	0	0.2955	0.7625	0	0	0.0384	0.162	0	0.1591	1.7108	0.3901	0.3491	0.2381	0	0.6573	0	0	0	0	0	0	0
AL117336.1	6.3673	1.0169	0.7809	5.2597	0.2975	0.4164	0.352	1.1692	0.3578	0.7566	1.6075	1.5431	5.5558	0.4595	0.8806	2.7505	0.8526	4.1364	2.0969	0.2027	0.8723	3.3603	5.769	2.9478	5.8391	1.5661	1.0892	4.2508	0.5386	6.7901	1.7875	2.4339	1.3856	1.1956	2.9557	2.9579	3.9042	1.4397	3.8652	3.1242	1.4845	0.4043	1.0247	1.0727	1.8184	3.1236	1.0294	1.45	4.4665
AL359220.1	1.9979	0.2564	0.6104	0.9283	0.7527	0.9147	0.8803	1.1389	0.2456	1.3651	0.4041	0.7923	0.9514	2.075	1.5996	1.883	0.1003	0.452	1.8505	0.8526	2.0614	3.0872	1.4016	0.6223	1.5845	0.6834	0.5206	2.399	0.9252	3.252	0.7782	0.4833	0.4298	0.9769	1.404	0.5323	3.0579	1.4306	0.5811	1.4705	0.2183	5.7008	0.5954	1.1541	0.8274	1.537	0.5316	0.5374	1.0113
AC016737.1	0.3745	0.6379	1.0148	0.3397	0.3266	1.611	0.0552	0.5705	0.2993	0.5538	0.3209	1.9361	1.8049	0.6847	1.0358	0.6667	1.3371	3.9665	0.5539	0.3179	1.3681	0.973	4.9595	3.2091	1.7942	1.8012	0.8541	1.3827	0.7095	0.822	10.7653	1.7654	0.5927	0.875	0.7554	1.3644	1.1098	1.2544	8.4418	1.8549	1.7628	3.6777	1.3259	0.7691	2.5477	0.668	0.9687	4.0024	0.8066
AC025031.4	0.1494	0.119	0.2742	0.1426	0.1524	0.4833	0.1262	0.4524	0.1344	0.3745	0.3742	0.1006	0.2947	0.2706	0.6539	0.5122	0.1746	0.3631	0.3165	0.0934	0.5063	0.503	0.744	0.9945	0.476	0.4678	0.2928	0.6127	0.1544	0.4758	2.5996	0.4206	0.5418	0.136	0.4597	0.3564	0.5123	1.0321	0.4105	0.4	0.228	1.6838	0.3804	0.5336	0.807	0.3781	0.2109	0.7573	0.2911
LINC01703	0.5786	0.7542	0.9036	0.5141	0.6488	3.0558	0.1828	1.0253	0.5945	1.9905	0.516	2.5929	0.9066	4.08	1.5546	1.3242	3.9251	1.7918	6.9221	0.5893	0.3623	4.9658	4.4376	4.1055	4.9499	0.9216	3.1669	0.4905	0.8501	4.1317	7.165	1.9271	4.3428	2.0416	1.4551	3.1439	5.676	1.927	5.2922	2.2478	1.2993	6.8013	3.5382	1.4959	3.0213	0.3244	0.4038	2.108	0.5903
THRB-IT1	0.9374	1.2485	1.7259	0.9455	0.0852	1.6702	0.8741	2.0098	1.3439	1.0838	2.2328	0.9109	0.4927	0.4388	1.0932	0.0955	0.38	3.8372	0.2319	0.2322	0.1666	1.5058	1.7344	0.3974	0.5235	2.5175	0.468	1.5937	0.2263	0.2958	0.2731	0.3777	0.6977	0.1269	1.4845	0.1662	0.1631	0.3361	0.4921	0.3836	0.081	0.2831	0	0.0878	0.9493	0	0.0874	9.0834	1.732
AC012306.2	11.1449	1.7766	3.9746	6.5808	4.4298	4.4286	5.3351	3.7995	2.0294	8.516	3.7299	7.9814	8.0187	5.6201	4.7411	11.3016	6.5737	3.5192	10.5045	4.3646	10.4366	5.6354	7.7827	20.1008	2.6614	6.5927	12.6691	5.1067	6.8159	6.6511	14.2576	20.8689	7.8369	5.2272	4.2494	19.7068	9.9261	10.3777	14.387	4.5092	9.2468	17.127	13.5543	12.5494	4.5124	6.6438	7.6636	9.3293	6.4774
ALMS1-IT1	0.8867	0.5086	0.4084	0.6647	0.1657	0.6848	0.2241	0.6616	0.3416	0.5017	0.5582	0.6921	3.5209	0.4022	0.9635	3.3625	0.4297	2.4074	2.9507	0.5483	0.7635	1.0901	0.5951	4.3878	1.612	1.3916	1.1483	4.2093	0.9942	1.4977	2.0767	4.5512	0.6215	1.8181	0.6794	5.8149	2.2718	1.1202	4.1236	1.5271	1.7718	7.9998	0.4689	3.5364	2.0258	0.6553	0.5461	2.146	1.2924
AC113189.3	0.2693	0.1475	1.1325	0.3141	9.0609	0.4227	6.254	0.3956	0.3632	0	0	6.693	1.0071	0.3499	0.447	15.6108	0	0.2399	7.8424	20.6769	10.4788	12.333	0.2169	13.3782	1.5726	7.0217	0.9675	1.9179	0.5467	1.0884	21.0494	5.5591	1.1509	17.6658	1.1113	3.356	21.9224	0.1624	9.7366	7.589	0.8611	2.7361	1.9505	19.1353	7.7532	1.2972	0.6967	3.5327	0.4122
AC025271.4	0.5922	1.2124	2.0787	1.3211	0.4908	0.1078	0.1025	1.2355	0.9259	0.0979	0.9644	0.2995	0.0963	0.0892	0.1068	0	0.4413	0.1147	0	0.531	0	0	0.8501	4.5098	0.0231	0.076	0	0	0	0.0462	0.1041	0.1476	0.1222	0.5157	0.1487	0.0675	0.071	0	0.0556	0.065	0.2058	0.2354	0.0249	0.238	0.1176	0.0276	0.0666	0.394	0
AC010168.1	0.2706	0.1481	1.1946	1.3409	2.2756	9.8379	4.1286	1.1261	0.0608	6.2371	0.8196	2.8611	0.9611	0.3515	1.6277	10.646	2.6808	3.9169	14.5746	3.1002	4.5961	6.8537	7.0271	2.9177	1.8836	1.7967	3.6098	2.328	6.0964	3.3407	1.7317	3.4903	2.1196	0.6096	3.2375	8.9605	10.2647	3.4258	3.9416	1.9912	1.5138	12.2314	0.7838	3.7508	5.0687	0.362	2.2746	4.6578	3.4507
CEP83-DT	0.2686	0.0784	0.2259	0.1044	0	1.0304	0.0238	0.0701	0.0322	0.1532	0.217	0.1325	0.5222	0.062	0.3417	0.9956	0.1918	0.2233	0.1341	0.0547	0.1766	0.6803	0.6345	2.4574	0.2734	0.229	0.3675	0.9562	0.1745	0.6753	2.9676	1.6836	0.7991	0.2152	0.4876	1.1272	0.1153	0.3023	0.541	0.4819	0.1861	0.291	0.4322	0.3723	0.3273	0.1533	0.2625	1.096	0.1827
UBA6-AS1	1.2532	1.095	0.9556	1.1282	0.6954	1.7971	1.5595	1.329	0.8085	2.5894	1.123	1.308	1.5491	1.4564	1.611	2.6375	1.1024	0.7896	2.1365	1.0813	2.1705	2.0497	2.2172	3.5606	0.4754	1.5331	1.1362	1.549	2.6098	2.0962	2.4368	3.049	1.4027	1.8727	2.0737	4.5479	1.4691	2.1063	2.5261	1.7941	1.6686	4.2086	2.0596	1.3765	1.1393	1.1919	1.688	3.5771	0.7387
AC068473.4	0	0	0	0	0	0.0795	0.8064	0	0	0	0	0	0.0568	0.2631	0.063	0.2864	0	0	0.2528	0.2321	0.7493	0.7401	0.0612	0.1986	0.1365	0	0	0	0	1.3643	0.1024	0.5227	0	0.6086	0.1254	0.1993	0.0699	0.7328	0.8198	0.3195	0.1822	2.9326	0	1.0531	0	0.9757	0	0	0
LINC02827	0.1479	0.0162	0.8087	0.0173	0	0.031	0.687	0.029	0.0399	0.0844	0.0815	0.1095	0.4979	0.1281	0.0368	0.3067	0.3011	0.0791	0.4184	0.0113	0	0.7927	0.1668	14.8898	0.1329	0.1164	0.0455	0.1931	0.024	1.1026	0.0399	0.0509	0.1264	5.1109	0.3907	0.912	1.1701	0.3568	0.1596	0.1493	0.0709	3.111	0.2143	0.3076	0.1893	0.0633	0.2551	0.5174	0.2566
AL138762.1	1.5202	0.0595	0.6164	0.4115	0.6697	0.3977	0.2161	0.5051	0.4393	0.6193	0.2991	0.2297	0.5279	0.6583	0.4956	1.7142	0.378	1.0641	1.1518	0.394	0.6248	0.9257	0.7652	1.7743	0.4146	0.8546	0.4458	0.9666	0.4629	0.6826	4.2799	1.3074	0.4124	0.2175	0.4032	2.5637	1.0986	0.9821	1.1425	0.9133	0.3689	0.9928	1.4155	0.4704	0.4962	1.3365	0.5852	1.543	0.3324
AP000547.3	2.7928	3.2485	1.6794	1.3331	0.3083	0.0909	0.2688	5.7537	0.9107	0.1926	3.6983	0.4285	0.8441	0.1253	0.3482	0.5728	0	0.2321	0.4214	4.4106	5.7253	0.8741	0.3263	0.454	0.247	0.0569	0.5495	0.4637	0.047	0.4808	0.351	0.5974	0.2199	2.0287	0.1672	0.2657	1.2377	12.8957	0.0937	2.0448	0.1157	0.6615	0.3773	0.117	0.4232	0.4027	0.1373	0.4903	0.7235
ARRDC1-AS1	5.4404	4.5987	4.9656	4.2687	3.2473	4.9583	4.8903	6.5558	3.336	6.1729	4.2948	4.1227	11.5316	7.0023	6.9382	5.5883	10.0307	5.975	6.5391	2.7292	7.2129	5.3983	10.6105	5.7516	9.7296	6.5857	11.7978	7.662	6.9929	8.6455	6.4358	9.4155	6.2137	2.6613	6.0828	6.5769	7.8977	14.0134	7.4268	3.4268	8.1864	8.9911	10.2768	8.2837	12.9568	5.2863	5.6207	10.304	6.9963
LINC02245	0.397	0.4031	0.7284	0.404	0.3723	1.8126	0.1437	0.6715	0.4542	1.386	0.4691	0.8777	0.977	0.4501	1.12	1.1564	2.389	0.9967	1.6513	0.2867	0.6407	0.9353	1.3776	1.0189	1.4589	0.6888	1.4223	0.711	0.2755	0.8296	1.4491	0.9104	1.549	0.7734	0.3455	2.4709	0.7634	1.3143	0.9347	0.771	0.5077	1.6278	1.4705	0.4419	1.6226	1.5141	0.5041	1.9723	0.6996
TBC1D8-AS1	0.8967	0.1767	0.6485	0.3555	0.1609	0.5817	0.3569	0.5971	0.3063	1.9264	0.4741	1.0051	0.8852	0.6678	1.131	1.6226	1.095	0.3195	1.3279	0.4658	0.7469	0.6115	1.2276	4.1492	1.0794	1.4291	0.2577	0.7662	0.2767	1.1434	2.9482	1.0077	1.3283	0.862	1.3171	2.8462	1.303	1.8382	0.7548	0.5279	0.2724	3.7531	1.1083	2.5276	1.4422	0.3839	0.4175	2.4699	0.4208
LINC01943	0.3013	0.033	0.1267	0.1405	0.2027	0.6936	0	0.236	0.2167	0.1146	0	0.6053	3.8531	0.8349	1.375	2.3852	0.9036	0.9931	1.0527	0.2071	0.4623	2.7005	1.1161	0.9452	1.0555	0.415	1.6388	3.2181	1.1498	4.2206	0.4872	2.4875	0.6008	0.7844	0.7459	1.4226	1.8566	1.4896	1.8207	3.5225	0.7706	0.4591	0.96	1.2182	1.6245	12.6729	0.6754	2.7992	3.9655
AL049539.1	0.4841	0	0.4071	0.4516	0.1086	3.951	1.2847	0.5689	0	0.8283	0.1067	0.7167	0.2896	1.0062	0.8837	0.73	0.4148	2.8464	0.3222	1.0354	1.0611	2.0752	2.651	6.0747	3.0441	0.6668	0.7949	2.2981	0.3145	0.6955	1.1742	2.8866	3.5855	0.4848	1.8376	3.3017	0.6233	0.934	6.8957	3.0131	0.6965	4.131	4.3939	0.7829	3.6276	0.829	0.0835	4.233	1.7781
AL358472.2	1.3476	0.3089	0.7116	0.8406	0.492	1.5741	1.3307	0.8594	0.4226	1.6088	0.4143	0.5965	0.8438	1.3028	1.2222	1.1519	1.2757	0.9772	1.7208	0.4309	0.9961	1.3129	2.7258	3.9737	1.5484	1.4799	1.4474	1.0786	0.3054	1.2101	2.8294	2.3	1.5177	0.5335	1.1638	2.0964	1.8159	0.4535	1.9954	1.028	2.7806	0.9551	1.4525	0.5069	1.2315	0.5702	0.9188	1.7813	1.311
MAP3K14-AS1	3.3172	0.7529	1.4961	1.9443	1.0794	2.1492	0.593	2.0031	0.7726	1.0947	1.581	0.8906	4.6405	1.9127	3.48	2.6404	0.5523	1.3016	6.5706	0.6302	4.5304	2.5789	4.7479	3.7071	3.6516	4.6163	2.1962	5.3649	1.1933	2.9481	6.6703	0.8377	1.2894	1.1274	2.2694	3.0547	2.0472	2.5494	4.8411	1.5903	1.5937	2.8375	2.7467	3.1572	5.5605	2.4375	0.8744	3.8983	1.7625
AC114296.1	0.0318	0	0.0268	0	0.1071	0.2166	0.3169	0.0312	0	0.0454	0	0.1347	0.3334	0.0827	0.0396	1.4706	0.2899	0	1.4571	0.3162	0.0175	0.1862	0.0128	0.1665	0	0.0157	0	0.1134	0.0776	2.0447	0.0215	0.0183	0.0151	0.2073	0.4336	0.0627	1.3326	0.1152	0.0687	0.1473	0.0636	0.2103	0	0.0368	0.0582	0.1534	0.3981	0.3655	0.0162
ZNF30-AS1	0.1422	0.2336	0.598	0.4975	0.0797	0.5952	0.0943	0.4874	0.1279	0.6083	0.235	0.0752	0.3191	0.1232	0.177	2.0104	0.0762	0	0.0592	0	0	0.2078	1.4888	3.1601	0.3832	0.07	0.2189	0	0	0.0639	1.9162	1.0599	0.2701	0.0712	0.7041	0.2798	0	0.0857	0	0.3588	0.2273	0.3612	0	0	0.3899	0.3805	0.0613	0.8549	0
LINC01356	0.0558	0.0153	0.0704	0.0488	0.0626	1.7092	0.0556	0.0137	0.0126	0.438	0.0154	0.2067	0.0104	0.0121	1.0311	0.3947	0.2243	0.199	0.0232	0.0533	0.1989	0.3401	0.0337	0.438	0.5895	0.1511	0.5158	0.1326	0.0567	0.1003	0.7337	0.4803	0.6231	0.0839	0.3687	0.7142	0.0385	0.0168	0.0753	0.0705	0.4575	0.0284	0.0809	0.0323	0.3955	0.2241	0.0241	0.5494	0.057
LINC01993	0.212	0.0498	0.0255	0.0177	0.017	1.1411	0	0.1038	0.0272	0.0144	0.0167	0.016	0.2379	0.1443	0.553	0.2427	0.0649	0.0675	0.0126	0.0347	0.0996	0.5017	1.3052	0.198	0.3946	0.0447	0.0311	0.1438	0	0.068	0.0816	0.1216	0.0288	0.0607	0.0625	0.3775	0.195	0.0365	0.474	0.1019	0.0847	0.0615	0.1609	0.035	0.1938	0.4539	0.0522	0.8443	0.1545
AC007066.2	2.4762	0.8007	1.5374	1.4535	0.3541	2.0868	0.7498	1.4323	0.4781	2.1644	0.8422	1.9507	3.1943	0.9355	1.8341	1.253	0.8901	1.4806	1.8251	0.6602	1.5482	1.2953	3.1319	5.0834	2.7022	1.635	2.6949	3.1953	0.4588	3.2833	6.9422	1.2387	2.3514	1.1816	1.1794	1.5695	1.9412	2.3047	1.0581	1.6914	0.9166	2.1273	1.8134	1.4975	4.3437	0.9249	1.39	3.4877	1.56
AC119150.1	0	0	0	0	0.177	0	0.9426	0	0.071	0.1501	0	0	0.4132	0.8203	0.0655	3.4964	0.1691	0	4.9908	0	3.8064	3.0761	1.2078	0.2064	2.6945	1.3201	0	1.6862	1.9228	2.7644	1.2763	0.2715	0	0.079	0.0651	0.5177	3.2669	2.1893	2.6406	1.6598	1.388	2.967	0.1524	0.6383	0.5049	0	0	1.8981	0
MIR3945HG	1.0546	0.0679	0.1043	0.2894	0.0464	1.1035	0.3293	0.1013	0.0186	0.0197	0.0228	0.2624	0.4794	0.1612	0.0858	0.6626	0.6645	0.0921	0.1032	0.1106	0.34	0.4835	0.0167	0.0811	0.2043	0.2848	0.4669	1.1289	0.8731	0.5757	0	0.0711	0.4516	0.3313	0.4949	0.7323	0.0761	0.3491	0.5133	0.4174	0.2975	0.8403	0.0799	0.1911	0.1512	0.2656	0.5706	0.1356	3.2492
AC090018.2	0.5077	0	0.0674	0.4674	0.3596	0.6152	0.6737	0.2879	0.048	0.2794	0.1766	0.4521	0.9193	3.3093	0.6652	0.5037	0.6297	1.1189	1.4673	0.4695	0.8493	1.1195	0.3013	0.8733	0.8642	0.3155	0.5759	0.7929	0.217	1.8238	0.4321	0.1532	0.5329	0.4817	0.2646	1.402	1.8925	0.7734	0.894	0.517	0.4058	2.4433	0.7483	1.2657	0.7326	0.2002	0.6452	1.2268	1.0906
LINC00885	0	0	1.4148	0.022	3.0312	1.8394	1.7557	0.1296	0.051	0	0.0625	0.5397	1.1309	20.5278	0.0314	1.4964	0.2835	0.1347	13.4612	3.35	0.8079	6.151	0.0457	25.499	0.1698	0.2232	0	0.0449	0.1074	10.8975	1.8339	1.3222	0.1615	14.1966	0.0468	44.8501	6.0152	23.8657	5.0792	1.892	0.0302	33.1445	0.3833	2.3147	0.0864	0.263	0.0326	0.2893	0.0579
AC078846.1	1.3615	0.3573	1.1292	1.1194	0.4362	1.4246	0.8991	1.0323	0.2877	0.7575	0.6773	0.6834	1.1543	0.9509	2.1918	0.887	0.8871	1.4589	2.0305	0.4026	3.3418	2.5185	1.6674	6.3642	2.0628	1.753	1.5518	0.6553	0.5349	1.8255	3.6015	1.6332	1.2928	0.8859	1.7759	0.7818	1.7485	0.9003	1.4354	0.5541	0.7523	4.2705	1.6539	0.7466	2.0527	1.0677	0.541	3.9021	0.7362
AC008073.2	0.4481	0.1636	0.2513	0.1742	0.0838	0.508	0.0991	0.2926	0.1007	0	0.0823	0.0395	0.1396	0.0647	0.124	0.352	0.08	0	0.0311	0.0285	0.1228	0.1819	0.0601	0.1464	0.1342	0.0367	0.0383	0.0886	0.0303	0.1341	0.3019	0	0	0.0374	0.1233	0.098	0	0.045	0.1209	0.0942	0.0597	0.1138	0	0.1294	0.0341	0	0	0.1225	0.0381
AC068733.3	3.3674	0.2962	0.5648	1.3163	0.2301	0.9566	0.0866	0.3837	0.2013	0.4168	0.2877	0.0691	0.2023	0.0162	0.2245	0.1231	0.03	0.0166	0.0155	0.1069	0.0613	0.4362	1.0367	0.4755	0.0922	0.0642	0.0766	0.1993	0	0.1759	1.6341	0.3637	0.1506	0.028	0.0924	0.1835	0.0858	0.0562	0.0403	0.1883	0.1342	0.1516	0	0.097	0.0767	0.1298	0.0724	0.3161	0.0857
AC015871.3	3.6557	1.4851	3.5869	3.3923	0.9698	4.504	2.3993	3.8113	1.555	3.9237	2.1002	1.9329	5.4535	3.0128	3.2292	2.9083	3.4107	4.1325	2.4855	1.1111	5.1268	2.9681	5.6351	13.1029	7.3803	5.4142	6.2735	5.8083	1.7715	7.466	8.2632	4.9359	5.1139	3.7987	3.3088	3.4545	4.8085	3.2471	5.4935	2.8765	2.6236	6.8688	5.371	5.8809	6.107	3.8918	4.0504	4.576	4.8931
ELF3-AS1	0.9655	0.568	1.161	0.8933	2.0224	15.4221	1.9588	1.9381	0.8322	5.439	2.057	11.5606	4.2551	2.3427	6.0587	1.0529	15.6595	7.1376	2.4231	4.0659	3.3758	4.2916	12.5509	2.8163	8.0214	13.5579	7.3052	3.0022	0.5119	2.9523	4.129	2.3425	10.6766	3.2763	8.1919	2.7004	4.7191	2.2999	3.6943	3.0673	3.6229	3.6561	7.9981	3.6598	4.463	1.3494	5.7109	5.1723	6.0575
IPO9-AS1	0.2442	0	0.176	0.0407	0.0391	0.7665	0	0.4099	0	0.1326	0.1537	0.0369	0.1304	0.6646	0.1737	0.4274	0.0374	0.0311	0.058	0.0799	0.5352	0.6117	0.3652	2.143	0.3133	0.1373	0.2148	0	0.1133	0.2506	0.47	0.48	0.1325	0.1747	0.2591	1.9673	0.5454	0.0841	0.8658	0.4694	0.2231	0.3189	0.3368	0.2418	0.3188	0.1867	0.0602	0.1525	0.2491
AL162595.1	2.0167	2.2678	3.5883	2.5289	1.2706	7.5335	3.899	3.2281	1.433	5.2207	3.2131	6.3292	4.0911	2.1738	6.64	2.4168	6.5216	3.3955	1.8808	1.0436	2.2816	6.9458	14.7881	21.2529	9.5553	8.8485	6.382	2.1104	2.3067	5.0973	7.6487	5.0915	11.264	3.3768	17.5511	3.399	3.974	1.8829	3.1944	2.6722	6.9725	13.8573	11.8048	19.7851	3.2204	1.3578	7.9375	20.2664	2.904
WASIR2	0.1686	0.0923	0.2837	0	0.0946	1.8088	0.1119	0.1652	0.0379	1.2826	0	0.535	0.8829	0.073	0.7697	1.9074	1.4904	0.3756	0.9822	0	0.1848	0.7394	1.9355	3.1415	0.7196	0.1659	0.1298	1.5512	0.0342	1.7795	2.4998	3.4811	1.8417	0.0422	1.7397	1.9909	0.5817	0.0508	0.5915	0.2128	1.7862	0.5997	1.0178	3.3122	0.7706	0.4513	0.6544	2.9495	0.4302
AC006972.1	0.0769	0	0	0	0	0.0403	0	0.1507	0	0	0	0	0	0.5665	0.0319	0.145	0	0	0.6082	0	0.1687	0.4123	0.031	0.1006	0	0	0	0	0	0.0346	0	0.0882	0	0	0	0.0505	2.1232	0	0.5813	0	0.0308	0.0391	0.0372	0.0444	0	0	0.1327	0.1682	0.0393
AC107032.2	0.5756	0.7564	1.1619	0.6713	0.7746	0.4819	0.9166	0.451	0.1035	1.97	0.1268	0.6087	1.8942	0.7976	0.8598	0.7595	0.6166	0.5128	1.0536	0.1759	0.8832	0.7852	0.8345	7.2236	0.6205	0.5663	1.8905	0.9565	0.6544	0.8271	8.5324	2.1123	2.1865	0.807	1.1401	2.1141	0.6353	1.1107	1.6151	0.9684	0.3681	0.8187	0.5558	2.261	1.1573	1.9715	1.092	1.3842	0.3524
AC105339.2	0.0616	0.0113	0.2247	0.0599	0.0922	0.5483	0.15	0.2516	0.0739	0.1856	0.1924	0.0543	0.2766	0.1958	0.2132	0.5907	0.1541	0.0732	0.1111	0.0628	0.3378	0.2903	0.182	0.685	0.563	0.2426	0.232	0.1463	0.0751	0.3783	0.5538	0.4949	0.4488	0.1235	0.4748	0.3504	0.4442	0.2354	0.2883	0.1901	0.2546	0.2296	0.3572	0.3561	0.169	0.143	0.1418	0.4942	0.2516
AP001178.3	0.0633	0.0924	0.2662	0.2215	0.0473	0.3091	0	0.124	0.1138	0.2207	0.1395	0.3124	0.142	0.1096	0.5078	0.1193	0	0	0.1756	0.2418	0.5782	0.4112	0.2549	0.993	0.2464	0.0415	0.2599	0.9016	0.1028	0.2274	1.8766	0.2662	0.2204	0.1902	0.1741	0.3875	0.1359	0.2545	0.2049	0.2485	0.2699	0.5574	0.1426	0.3657	0.1736	0.0226	0.2365	1.1763	0.1292
LINC01311	0.7073	0.2021	0.5431	0.4304	0.3449	0.5471	1.0202	0.5723	0.1106	1.1986	0.3388	0.3903	1.587	0.7457	0.8932	3.5651	1.2189	1.7809	2.9679	0.3759	1.719	0.779	1.4613	1.6884	2.2378	1.18	1.6097	0.803	2.0477	1.7951	7.4593	5.0783	1.1389	0.8931	0.533	1.8959	1.8103	1.1868	5.1773	1.5262	0.295	3.1243	3.9793	0.3198	2.0517	0.3621	0.9281	2.1178	1.0041
THORLNC	0.0804	0.1232	0.2027	0.1312	0.018	1.2277	0.0427	0.1574	0.0867	0.2292	0.0177	0.5099	0.1202	0.3201	0.4668	0.3484	0.2755	0.0143	1.4976	0	0.5108	0.7673	0.8672	1.2815	0.3176	0.1739	0.5113	0.6295	0.0522	0.9959	1.0395	0.8846	0.5189	0.0644	0.1857	1.6021	0.4582	0.0775	1.9946	0.5002	0.1542	0.5715	0.4035	0.2414	0.6463	0.1892	0.2356	1.1419	0.1476
AL117329.1	0.0026	0	0.1067	0	0.0297	0.4565	0.8193	0.0065	0.0071	0.0025	0.0131	0.0014	1.1184	0.4718	0.0252	1.276	0.6062	0.1861	0.6545	0.0313	2.5156	1.2006	0.1448	1.9149	0.0107	1.1043	0.0027	0.0047	0.307	1.724	2.0489	0.8687	0.0013	0.6236	0.0065	1.0197	0.7017	0.8339	1.0701	0.7184	1.0272	1.5272	0.0026	0.3712	1.5829	0.0113	0.0068	0.7197	0.0108
AL355881.1	0.037	0.0405	0.1244	0	0	2.8627	0.0491	0.1448	0.133	0.246	0.0407	0.2737	0.1106	0.1601	0.3681	0.1045	0.3168	0.9223	0.9227	0.0282	0.1621	0.5763	0.2977	0.6766	0.465	0.2182	0.0379	0.7898	0.06	0.1328	0.7473	0.3392	0.2106	0.7405	0.4882	0.291	0.204	0.2229	0.4788	0.0933	0.4433	0.3756	0.2499	0.3844	0.2703	0.3166	0.4463	0.1616	0.8676
LINC01560	3.1919	0.8933	1.1334	0.9926	0.7159	2.3009	1.2706	1.5283	0.7015	4.1807	1.7582	2.7003	2.4137	3.5629	3.2373	2.4067	1.6716	2.2118	2.8621	1.3546	4.9365	3.9046	8.3403	5.3778	4.6516	3.559	2.73	2.7781	2.3326	5.2232	19.0686	8.7439	4.6476	3.3385	1.3463	7.1173	5.2844	5.4744	4.8607	2.0882	3.7137	7.6745	5.2397	6.3917	3.3384	1.7841	3.0275	7.9083	2.6416
AC023283.1	0.0465	0.051	0	0.2171	0.0522	0.5356	0.1852	0.2734	0.0837	0.4866	0.1025	0.1968	0.348	0.6448	0.3089	0.614	0.4486	0	0.6581	0.2133	0.51	0.8161	0.0375	0.2433	0.3344	0.1831	0.4298	0.1657	0.0756	0.6686	1.1914	0.3202	0.3093	0	0.0768	0.4883	0.3852	0.2806	0.4017	0.2348	0.1116	1.4655	0.2696	0.6451	0.2552	0	0.2006	1.3733	0.1424
AC098869.2	0.7217	1.863	4.3357	1.8036	4.1047	7.9838	1.1629	8.2297	2.2248	5.5869	8.9164	3.7071	3.3544	1.0269	3.294	0.3401	0.8283	2.8017	0.1716	2.9536	0.8475	3.1141	2.4911	1.0108	3.7976	4.6154	4.9207	5.5066	0.2093	1.6203	1.8062	1.3006	3.7205	1.2906	7.36	0.541	2.0389	0.373	0.5007	1.2575	3.3791	0.419	0.896	1.0125	6.8315	0.6621	1.6447	3.6628	3.8924
LINC01018	2.3743	0.7913	0.7814	1.4092	0.109	0.1017	0.1531	0.3449	0.535	0.1847	0.2943	0.1156	0.1362	0.2314	0.0756	0.1202	2.6215	0.0541	0.0707	0.1206	1.1048	1.5679	2.0491	6.4773	0.1036	0.0299	0.0312	0.0721	0	0.5453	0.581	2.8272	0.0634	0.9122	0.0551	3.2895	1.3572	0.0952	0.924	0.143	0.0971	4.337	0.0293	0.0561	0.0277	0.2665	0.0209	0.7036	0.0372
AC100814.1	5.9204	2.1871	3.8393	2.7451	1.1199	4.553	4.1646	2.5149	2.2446	1.5596	2.2788	1.9612	5.4948	4.8802	6.1558	2.353	9.169	9.3417	9.0796	3.1059	15.8699	6.8107	6.6638	9.0444	6.8564	2.4562	2.7819	6.3493	1.7376	3.2028	25.5676	8.2614	4.6737	5.0002	5.4744	7.5784	7.6102	1.0322	3.0021	6.3598	8.6665	10.3627	4.6148	1.4009	5.215	3.6646	5.228	6.6273	1.2373
AC245140.3	1.8952	0.0716	0.3298	1.2956	0.2199	0.4787	1.1273	0.32	0.0588	0.3727	0.144	0.7602	0.7331	0.7924	1.3015	1.0471	0.84	0.8151	1.468	0.2995	2.0771	1.3371	0.3684	3.1607	0.9393	0.4501	1.4756	0.7756	0.2123	2.4648	3.1702	1.7985	1.8617	0.9817	0.3236	1.0286	1.142	0.9457	2.8915	0.6047	0.3134	1.7926	0	0.151	1.9111	0.9093	0.2818	1.3572	0.2667
AC079684.1	0.9152	1.3363	0.7697	1.6603	0.4562	2.2346	1.2144	1.8922	0.7314	0.6767	1.3443	1.8281	3.6506	1.4091	2.5315	2.0127	0.6536	2.9897	1.6074	0.6991	6.1298	2.7742	1.2285	2.1268	8.9525	1.5007	2.4005	5.5517	1.9817	2.4656	7.8107	3.4983	3.0901	2.7495	0.7553	6.4023	2.0576	0.981	5.1578	1.1975	1.3006	5.5787	2.2585	2.2321	2.8809	1.3061	1.7537	4.1127	3.7352
AC011773.1	0.2849	0	0.559	0.2215	0.4259	0.5962	0.126	0.279	0	0.1805	0.1046	0.2008	1.2073	0.8223	0.394	0.9844	0.3051	2.6225	0.158	0.0725	2.4977	0.4626	1.2236	5.2132	1.2795	1.2144	0.2924	0.7889	0	0.5116	2.9429	0.7622	1.082	1.8067	0.6269	2.6155	0	1.1451	2.2544	0.3195	0.3795	1.6399	0.1834	0.1097	2.0827	0.4065	0.4913	1.0379	0.2907
AC010913.1	0.1076	0.0505	0.0776	0.0359	0.138	0.4505	0.102	0.0753	0.0138	0.2924	0.0678	0.374	0.253	0.0932	0.1148	0.4493	0.2141	0.1096	0.4477	0.0822	0.1011	0.1648	0.2724	0.603	0.5525	0.0908	0.2052	0.3102	0.1748	0.1381	0.1865	0.9345	0.219	0.1078	0.165	0.4639	0.3394	0.4821	0.9459	0.2716	0.2581	0.6874	0.7276	0.2487	0.3373	0.1646	0.2652	0.8404	0.1726
AC245041.2	0.0356	0.0195	0.0299	0	9.7754	0.7446	4.1546	0.1394	0.096	1.522	0.2548	6.2081	11.5752	16.1461	3.041	16.3305	0.2668	1.157	14.7411	9.5264	16.5922	7.557	0.3439	1.3255	0.3676	1.3476	1.0955	9.7333	15.8175	14.4738	0.5034	14.4023	0.7095	7.892	0.4991	0.0467	18.9963	18.1063	7.4488	4.9678	0.6257	6.3978	1.4601	0.3905	1.4795	5.6741	0.4448	7.2531	4.4107
TMEM220-AS1	0.9326	1.9351	2.1054	2.2515	0.367	1.2669	0.2822	4.0541	2.1919	1.7887	2.0909	0.173	0.4895	0.0992	1.4527	0.3084	0.0175	0.3936	0.0408	0.3375	0.3586	0.1116	1.1201	0.663	1.0289	2.0443	3.5768	0.1554	0.0664	0.3233	0.3087	0.0938	0.5438	0.3769	0.7561	0.1717	0.0602	0.1184	0.2472	0.289	0.4316	0.3491	0.2528	0.2457	3.4092	0.4028	0.127	1.4844	0.1836
AC046143.1	2.1031	0.5007	0.8075	1.4929	1.0254	2.7747	4.4892	1.0298	0.6166	0.6085	1.0073	1.3537	2.0174	2.8508	2.8074	2.413	5.8768	4.9692	11.7152	1.1176	2.355	4.4989	2.5406	2.6296	2.0125	5.8923	1.8769	4.8292	2.0418	5.9532	1.6018	1.8349	3.9507	1.9229	2.6788	3.7779	3.8686	9.0419	1.1348	3.3456	2.3754	9.8932	2.3839	2.2183	1.922	2.202	1.3403	2.1988	3.9651
AL603839.3	1.1752	0.4022	1.5444	1.2849	0.4942	3.1513	0.3899	1.079	1.0566	1.5362	1.1328	2.4079	1.3184	1.145	2.6818	3.1845	2.9112	2.9448	2.5666	0.6172	0.5635	2.791	5.9156	7.6812	0.3959	1.0117	2.1862	0.3487	0.5964	1.781	14.4508	4.5484	0.6975	1.0298	0.9699	3.372	1.5538	1.1515	0.8719	1.5446	1.1743	8.6562	1.5604	2.0366	2.7522	1.7296	1.6467	4.737	1.349
DLGAP1-AS1	8.8415	1.1959	1.7309	5.8534	2.0961	10.5263	2.2294	3.6405	1.3406	17.988	3.9793	4.1752	7.9162	12.1313	19.4833	4.9483	17.0298	4.5653	7.4956	2.5829	2.624	6.5886	10.1481	5.463	18.9416	7.934	12.9541	9.2223	3.4788	16.0494	32.2332	6.2615	21.8771	2.8392	9.7054	7.3824	11.7054	9.8518	137.071	4.1335	3.2063	14.935	24.842	6.1383	6.6791	12.9249	17.2576	9.5725	15.2139
AP002449.1	1.5938	0.924	0.8673	1.4213	0.2103	1.962	1.7416	0.4591	0.4215	0.5347	1.1361	1.1897	1.8932	2.7606	1.8671	1.8556	1.6068	3.5081	4.6799	0.931	1.5413	3.3797	1.5856	4.2893	7.6641	3.136	6.4468	4.6733	0.3045	1.9364	8.338	3.2252	5.5197	2.9104	9.3616	5.0418	7.157	3.2787	3.6423	3.4697	0.5995	3.8098	1.4485	0.5415	2.8274	2.1072	1.7785	5.4313	2.1045
AC021242.3	0.0968	0	0.0543	0.0753	0	0.3715	0.0428	0	0.029	0.0307	0	0.0341	0.2172	0.0279	0.3749	0.365	0.0346	0.2013	0.2685	0.0247	0.2122	0.566	0.4938	0.464	0.087	0.2858	0.0662	0.2681	0.2096	0.2608	0.1305	0.8882	0.1839	0.0646	0.1065	0.0847	0.1484	0.1946	0.9752	0.1357	0.1032	0.3279	0.1246	0.1491	0.1475	0.2072	0.1113	0.4586	0.0329
AL078644.1	0.4727	0.3236	0.5467	0.4135	0.4639	0.4328	0.7841	0.5787	0.2656	1.0112	0.9765	0.5624	0.5304	1.8424	0.6375	6.5163	1.5192	0.3159	1.0816	0.2709	0.7124	1.2091	0.8091	3.4761	1.0086	1.1046	1.5769	0.6312	1.3436	1.4859	2.2296	1.6263	1.459	1.5386	1.3167	2.6354	1.1957	2.2091	0.9566	1.5906	0.2362	1.5609	0.9701	1.9115	0.8101	0.5692	0.7134	0.8397	0.6632
DANCR	4.0077	6.7361	5.3275	4.0883	7.3438	8.2366	10.856	4.9939	5.8209	14.8909	7.623	5.5493	2.8113	9.8568	15.6537	4.1516	11.0927	8.5958	17.8482	6.033	7.0288	5.7508	6.1776	7.2476	6.5025	8.7319	17.5373	9.3835	16.0622	6.4179	4.8652	13.0163	21.6652	10.0729	8.0846	31.1853	7.589	15.1203	18.7369	4.7444	29.8436	21.1739	18.0007	6.4104	4.4965	3.2849	19.6239	13.2089	11.3588
AC104335.1	0.9292	0.2212	0.2718	0.424	0.2265	0.5918	0.7505	0.633	0.0726	0.5761	0.4005	0.1282	0.7251	0.8747	1.2068	0.3427	0.2596	0.3239	0.605	0.1543	2.7894	2.3223	2.733	3.3269	2.6856	0.4372	0.3732	0.4315	0.0656	0.3628	0.6533	0.5559	0.6522	0.7687	0.6001	1.6427	1.4119	0.2436	1.3079	0.6116	1.0979	4.6378	0.156	3.2203	0.923	0.5189	0.209	2.2521	0.371
LINC00630	0.9613	0.2038	0.4205	0.5515	0.2217	0.9491	0.5349	0.672	0.2056	0.7001	0.5295	0.4099	0.7248	0.6815	0.846	1.2897	0.4485	0.449	1.0352	0.2665	0.667	0.6723	0.7586	1.2566	2.4933	0.778	0.5132	0.8879	0.2455	2.1478	1.3268	0.7957	0.7583	0.6599	1.2796	1.744	1.1765	1.1967	0.8241	0.939	0.6817	1.6264	0.932	0.7613	1.1088	0.3859	0.6585	0.733	0.4628
AL592494.2	0.1915	0.1049	0.886	0.4468	0.4296	0.4009	0	0	0.0861	0	0	2.2281	0	0	0.0795	0.3611	1.1285	0.0853	0.239	0.0732	1.6795	0.7465	0.6942	8.1375	0.086	1.4134	1.2778	0.4547	0.3111	4.5583	7.6143	1.3179	2.0008	0.4795	0.079	2.0099	0	0	0.2067	0.9667	0.7655	1.1676	1.9421	0.2213	0	2.0502	0.2477	2.0937	0.3909
AC092821.3	0.2009	0.0407	0.1251	0.0694	0.0667	0.2958	0.0592	0.1967	0.0401	0.0707	0.082	0.0865	0.1836	0.1031	0.1543	0.3576	0.1195	0.1326	0.2971	0.0171	0.2202	0.3769	0.1079	0.8558	0.3409	0.0293	0.1069	0.2561	0.1389	0.2606	0.8722	0.3583	0.2967	0.3427	0.1903	0.5562	0.3695	0.1884	0.3774	0.1439	0.0773	0.1134	0.0718	0.0945	0.3196	0.2867	0.1026	0.2602	0.2581
LINC02535	0.1238	0	0.0149	0.0619	0.0198	7.6976	0.2816	0.0693	0.0159	2.3871	0.039	5.0116	0.2777	0.0459	1.7462	0.9833	19.3403	4.238	0.1324	0	0.0194	0.4307	1.8656	0.0231	10.1668	2.5052	2.6498	0.3778	0.4021	0.0476	0.0953	0.0406	3.8286	0.0708	10.4049	0	0.5042	0.1279	0.0763	0.119	9.4281	0.4851	2.4247	3.5138	19.6191	0.265	2.2719	1.1404	0.3609
CAMTA1-DT	0.5354	0.5863	0.5403	0.4995	0.3603	1.4566	0.2842	1.6779	0.2888	1.5269	0.2359	2.7177	2.0822	0.8346	1.866	2.3212	1.0323	1.7172	2.1381	0.4908	1.8778	1.0433	3.1046	5.319	1.1543	0.8428	1.2089	2.4147	0.8695	1.5386	10.9663	2.7014	1.3219	1.5013	1.0604	7.0226	1.4773	1.6787	3.6979	2.5219	0.7703	1.1967	2.2748	2.7216	1.8593	0.5731	1.8467	2.575	1.0926
PIK3CD-AS2	1.6091	1.1401	1.393	0.8279	1.5391	2.8227	1.1931	1.4368	0.5531	0.3599	0.4171	5.2549	1.7697	3.8527	0.9032	8.6977	21.3425	0.3373	14.2136	1.2292	3.527	2.9971	2.8586	18.6826	0.7653	5.82	0.3886	2.4152	0.9991	1.3175	15.3053	8.8459	0.8089	4.8814	0.4687	24.0848	7.6608	0.6849	4.1879	4.1797	1.2105	5.9618	2.5591	17.6049	1.1245	3.2418	0.4897	13.1393	3.1387
AC005479.1	0.679	0.0826	0.4442	0.3519	0.5923	1.2632	0	0.7389	0	0.3586	0.0831	0.2394	0.6207	1.2415	1.5652	3.8398	1.0506	0.8738	0.4394	0.1729	2.0672	1.6172	0.6076	0.1972	1.7622	1.633	0.3872	1.0745	0.3676	0.271	1.0167	1.3843	1.1463	0.68	1.3698	0.9896	1.8736	0.8189	0.3257	0.6346	0.2412	0.9964	0.1457	2.0047	0.7585	0.0808	0.1952	1.3195	0.077
WNT5A-AS1	4.7994	0.8759	1.4202	0.5182	45.5489	1.209	30.5447	1.8279	0.5593	1.9433	5.8746	14.568	11.6989	125.54	2.5813	25.7997	5.5219	1.5836	61.668	38.5639	1.3637	9.8716	3.9368	13.1282	1.4371	1.9237	4.0136	2.1097	23.0216	25.6999	1.4372	7.8477	2.5319	18.2456	5.5009	12.357	29.755	26.2589	26.1843	9.3446	2.4154	42.7988	8.5821	4.4151	8.6097	1.6172	6.4374	3.9831	6.6199
AC106876.1	0.1093	1.9753	2.4364	1.5936	0	10.6384	0	3.426	4.1772	4.4167	4.1549	2.9479	1.0629	0	3.9914	0	7.7874	1.8505	0.0455	0	0	0.0533	1.9369	0	3.1426	1.1831	3.7025	0.1946	0	0	0	0	7.2148	0	2.6614	0.1434	0	0	0	0	3.2332	0	5.0142	1.5155	3.3968	0.117	1.6496	2.2106	1.3385
AL359921.2	4.9103	1.5235	3.5102	3.1495	1.3766	6.4227	8.1446	3.2861	1.6923	4.5901	3.0653	2.6829	6.4267	9.71	6.3157	3.1624	8.4159	4.6664	6.0597	1.3129	4.4847	7.0168	10.2819	14.4421	10.0721	8.4541	3.9477	3.4967	3.8543	4.777	22.9382	6.4754	5.5177	5.409	9.3201	7.192	3.3119	2.3686	11.128	10.5321	3.2054	6.1525	3.9513	8.0364	6.1329	7.0075	6.9862	14.4917	4.3421
AC079921.1	0.7354	0.1655	0.4829	0.2232	0.2034	0.5166	0.0802	0.3453	0.1268	0.0575	0.2109	0.1278	0.4973	0.3839	0.4013	0.2754	0.2482	0.0898	0.352	0.1	0.7398	1.5312	0.3164	1.8042	0.1991	0.0892	0.2792	0.8609	0.2209	0.8052	0.6788	0.7625	0.2296	0.5751	0.4822	1.0175	1.1304	0.1944	0.5545	0.3813	0.0805	0.7062	0.1556	0.1862	0.6353	0.4205	0.0956	0.9691	0.956
AP000866.1	1.3174	0.5305	1.1687	0.8177	0.162	0.7293	0.4455	1.5982	0.7412	3.8298	0.5009	0.6067	0.4672	0.3717	1.2554	0.2243	0.0546	0.2537	0.8061	0.1591	0.4052	0.4844	1.3724	2.272	0.3054	0.3972	0.6935	0.4741	0.1035	1.0151	3.3099	1.3937	0.9201	0.1702	1.2064	0.3567	0.4651	0.2152	0.2201	0.4003	0.4042	1.9342	0.1477	0.4468	2.3807	0.4639	0.3481	2.6152	0.5637
AC027682.1	0.692	0.1083	0.582	0.4612	0.2217	1.0862	0.2624	0.3389	0.4444	0.5639	0.1634	0.1045	0.8873	0.3425	0.8204	1.3045	0.3707	0.7046	0.0822	0.3021	3.0339	0.9151	0.2787	4.1354	0.8881	0.4377	0.5073	0.9387	0.4415	0.222	1.532	3.0609	0.2347	0.2475	0.979	1.6857	0.682	0.9538	1.2803	0.6652	0.158	1.6572	0.6682	0.9708	0.4066	1.0052	0.5115	0.5403	0.5548
SUGT1-DT	0.9571	0.9982	1.8399	1.3288	0.6134	2.5277	1.7539	1.9194	0.9015	1.0832	1.6569	2.8919	4.261	1.1447	3.0635	2.4915	2.9294	5.5631	3.1852	0.9053	2.0481	3.2417	9.6539	6.6133	3.3984	1.3901	2.5728	2.4342	1.1103	3.1516	9.6425	5.1743	2.467	1.278	1.166	3.7065	3.1021	2.0886	9.247	2.9903	1.5666	5.9269	4.181	4.265	3.2906	1.9025	2.2794	5.2311	1.7672
LINC01232	0.6093	0.6202	1.6459	1.3543	0.6271	9.204	0.39	2.05	1.5082	18.5021	2.843	1.7815	4.9111	1.788	2.201	3.8308	1.7892	6.6741	1.6759	0.7064	3.8498	6.0066	1.4664	9.8768	7.9017	4.4644	8.1814	3.4713	0.8731	7.0814	1.6905	2.5484	2.6957	0.6389	5.8212	0.2445	3.0791	2.9652	2.4137	1.3688	1.9483	12.6576	4.2502	6.9484	6.2565	1.6727	3.5852	2.484	1.4994
PKD1P6-NPIPP1	1.5626	0.1919	0.2702	0.4598	0.1146	0.5501	0.4844	0.2574	0.0525	0.0972	0.2252	0.3243	0.7208	0.0506	0.4605	0.4404	0.3129	0.3123	0.5589	0.2677	1.1844	0.7968	0.8821	1.9662	0.3804	1.2931	0.3597	0.8493	0.3202	0.8787	1.8301	1.3899	0.3467	0.585	0.2892	0.9003	0.7387	0.5812	0.8353	0.2211	1.1556	0.3412	0.3384	0.7255	0.2135	0.3126	0.2267	1.5484	0.4172
LINC01012	0.2755	0.1401	0.2152	0.0803	0.2869	2.7801	0.0392	0.2506	0.0708	1.2535	0.0434	0.9053	1.6117	1.2442	2.2537	2.4484	0.506	0.0175	1.138	0.5638	0.7442	2.7036	4.7708	4.0004	4.4464	1.1036	1.3432	1.635	0.2157	1.405	9.6665	2.9451	0	0.6307	2.5011	2.4523	0.8145	0.7595	1.7522	0.9684	0.0472	1.8994	0.9312	1.7507	1.6187	0.8004	0.7297	3.6678	1.004
GHET1	0.3497	0.0255	0.2157	0.1903	0.3922	1.6834	0.495	0.2283	0.0629	1.1969	0.5651	1.3561	0.837	0.424	0.8513	1.0548	0.6743	0.3116	1.7264	0.659	0.6644	1.3857	0.7511	2.2553	1.0053	1.491	0.5264	0.4427	0.5301	1.2144	2.0107	1.6042	0.952	0.6771	1.443	0.2752	1.3295	1.0684	0.2264	0.5099	0.5218	0.9948	2.0712	2.3972	1.108	0.0499	0.5227	1.682	0.4996
ZRANB2-AS2	0.2569	0.1701	0.2713	0.2961	0.0268	0.1907	0.0396	0.3276	0.1799	0.0823	0.181	0.0221	0.0782	0.0983	0.0868	0.0338	0.1248	0.0452	0.1715	0.0707	0.1048	0.2619	0.2261	0.7848	0.0376	0.1646	0.0828	0.0851	0.0291	0.1475	0.3945	0.0993	0.0567	0.0628	0.106	0.1998	0.1071	0.0144	0.2966	0.1307	0.0239	0.085	0.1125	0.0966	0.0737	0.0575	0.067	0.1992	0.0427
PELATON	2.2791	0.0593	0.1568	0.1893	0.2697	1.1641	0.0718	0.4358	0.0703	0.3544	0.0861	0.8776	1.8574	0.6406	0.4291	0.9691	3.2272	1.0125	0.9656	0.4731	1.127	0.8378	0.494	1.9416	0.8535	0.3727	0.9134	3.6612	1.0742	3.7369	0.1378	1.5101	1.8615	1.1502	2.2629	0.5679	0.8075	1.7331	1.6483	5.6194	0.9758	4.9362	2.1078	4.7518	1.1101	1.5576	1.2237	0.5981	1.3682
AC127502.2	4.3285	1.0971	0.6677	0.9038	1.0387	2.057	1.5801	2.351	0.4928	0.9344	3.0818	3.2382	3.1101	2.9302	1.7567	1.7102	1.6806	1.0104	0.8177	1.8338	5.5313	5.5985	2.0855	8.6726	4.5677	1.748	2.134	5.2943	0.7214	4.3115	6.2658	3.6848	3.195	3.4829	5.5999	3.7685	7.3713	2.4162	2.8966	1.5899	1.1634	4.724	0.7666	1.4194	3.1439	1.4162	3.439	4.3388	3.1051
LINC01839	0	0.0669	0.1542	0.6416	0.0685	0.1919	0	0.5986	0.055	0	0.2694	0	0.1829	0	1.3188	0.1152	0	0.0545	0	0	0	0.2382	0.2954	0	0.0549	0.0601	0	0.0725	0	0	0	0	0.4063	0	0.1009	0.0802	0	0.2211	0	0	2.785	0	0	0	0	0	0	0.2004	0.2495
AC002550.2	3.3836	1.1116	2.2766	2.6306	1.1384	2.4784	3.2926	3.9766	1.2169	4.6105	1.491	2.1469	3.5429	1.8559	2.995	2.6575	1.0874	4.6223	2.7212	1.1201	5.6863	5.2747	5.0868	3.5384	5.1674	3.3289	2.8939	3.7481	2.2896	2.127	9.879	4.7855	1.8208	3.2755	4.0023	7.8407	3.942	3.4004	29.699	2.2769	3.3358	5.2709	2.9406	0.6515	1.4431	5.1909	1.4588	5.7944	1.6111
LINC01050	0.1614	0	0	0	0.0259	0.0241	0	0	0.0207	0	0	0.0244	1.1901	0.9986	0.3827	2.7386	0.1482	0.0822	0.0959	0	0.1264	0.2247	0	0	0.1864	0	0.0237	1.4232	0.0749	1.1597	0	0.4496	0.0219	0.0924	0.1142	0.3025	1.315	0.3615	0.3733	0.6401	0.0369	0.0469	0.1559	0.666	0.2951	0.543	0.1193	0.0252	0.1882
AC134043.2	0	0	0	0	0	0.4373	1.2015	0.2729	0	0	0	0.221	0	1.87	0	0	0.0746	0.0621	0.6954	0.4257	1.0687	1.2894	0	0.6373	0	0.0685	0	0.4133	0.2262	2.2518	0.0939	0.0799	0.1323	0	0.1724	0	0.6406	1.2599	0.9772	0.2343	0.1114	1.9813	0.2018	0	0	0.4473	0.0601	0	0.0711
AC008687.3	0	0.0814	0.25	0	0.3333	0.1555	0.3944	0.0728	0.0668	0	0	0.6287	0.2779	0.5792	0	0.9105	0	0.0662	1.1128	0.8515	1.3031	1.086	0.0598	3.2056	0.1335	0.1462	0.0763	1.7639	0.181	1.7351	1.2016	1.5339	0.0706	0.3721	0.0613	0.3899	2.3238	1.165	1.5237	0.6876	0.1782	1.6609	0.6458	0.7727	0.2037	0	0	0.5686	0.0758
AC093827.4	6.6158	2.1196	3.6426	4.1074	1.4411	7.4706	2.1263	4.506	2.539	4.7358	2.9363	2.3656	3.4766	1.2091	3.9364	3.2148	0.9007	3.675	1.2407	1.7331	2.4691	1.7467	2.2871	6.989	1.3112	3.7461	3.68	3.9354	1.1079	3.8325	2.822	2.1468	2.6515	1.9224	1.8461	1.7064	0.8609	1.9706	1.4211	1.4813	3.3353	3.9328	2.0222	1.9245	2.8273	2.3773	1.7921	2.9828	5.6495
AC234917.3	1.047	0.5642	1.0762	1.1241	0.8573	1.2173	2.5139	0.765	0.4184	2.1486	0.7689	0.8963	1.2305	3.08	2.6891	5.0121	2.3321	1.0808	4.5212	0.8887	3.8796	1.862	0.9235	9.7323	1.7318	2.7795	6.8908	1.3412	1.7273	6.7009	5.6657	3.0491	4.0557	4.2105	3.0446	7.5639	3.057	3.2867	2.8336	2.8516	2.7498	7.5638	2.9046	2.2079	3.1438	1.0495	1.2754	4.6867	1.5261
AC091152.2	0.2595	0.0568	0.0727	0.1412	0.0388	0.1448	0.0918	0.1525	0.0311	0.0329	0.0953	0.0366	0.0906	0.1049	0.1435	0.1467	0.0741	0.0154	0.1151	0.0661	0.2085	0.2359	0.0697	0.2487	0.1709	0.2553	0.142	0.1642	0.0702	0.1864	0.5827	0.238	0.1643	0.0693	0.4283	0.2496	0.3182	0.2086	0.1867	0.1309	0.0968	0.1406	0.0167	0.0999	0.1107	0.1851	0.0746	0.3403	0.0706
AC116049.1	0	0	0.7435	0	0	1.4184	0.6256	0	0	0	0	0	0.1763	2.2458	0	1.222	0.2525	0.105	1.7652	0.045	2.3254	3.1008	6.5503	13.02	0	1.9715	0	0.2798	0.6221	2.4876	4.2092	5.6771	0.4477	1.0034	0	20.4858	0	1.3504	0.5724	0.4462	0.5182	4.4308	0	0.3404	0.1077	0	0	1.675	0
AC073046.1	2.8486	2.9947	4.4082	2.6576	21.4673	10.6116	14.2125	5.3565	2.8685	21.7723	7.406	7.3503	6.8175	18.9468	5.8622	41.5604	13.1822	2.944	10.4278	13.1436	11.9888	16.8746	2.8448	18.0226	16.8895	25.6714	14.969	3.5161	21.6504	6.8558	6.1417	8.3625	18.9353	12.894	21.7215	23.4646	27.2482	41.9098	3.3201	3.067	9.2902	59.9637	22.0055	23.8263	12.6001	2.4392	21.124	8.0957	14.7651
LINC01967	0	0	0.0935	0	0.9262	0.7977	0	0	0	2.0081	0	0.7894	0.392	2.0082	0.0264	0.6736	2.0586	0.0141	1.0703	0.0364	2.9243	4.0542	0.9465	0.8097	0	1	0	0.0565	4.1655	1.5118	3.8737	1.0563	1.3121	0.3976	0.0262	2.0624	1.6068	1.7046	0.2742	0.1737	1.5869	0.5809	0	0.2018	1.3934	0.017	0.0137	3.2985	0
MCCC1-AS1	1.5684	0.5725	1.2702	0.6774	1.2377	0.851	0.4625	1.9912	0.4178	1.7671	1.0239	0.7986	2.9108	1.4086	1.2051	0.3832	0.3734	1.7596	0.9182	1.1981	1.5916	5.9993	2.5731	3.7208	1.5133	0.9716	1.3116	2.413	0.1415	2.7648	6.497	1.0658	0.8274	1.687	1.4861	3.5049	3.0988	3.5026	25.6395	0.6352	2.1359	4.3671	0.9536	2.5501	3.2383	0.5596	0.7513	2.2223	1.7781
PAN3-AS1	2.2038	0.6844	0.9682	1.4577	0.4426	0.8261	0.8293	1.353	0.8576	2.0325	1.1596	2.0871	2.1895	0.6552	1.2829	1.9221	1.3037	0.7619	0.821	0.5528	2.6317	1.314	2.967	3.3968	1.2706	0.7443	1.0465	2.4204	0.828	1.7132	10.0173	2.5649	1.4681	0.8564	0.8415	1.5532	1.5127	1.3487	5.7505	1.4664	1.525	3.4754	1.6199	1.14	1.5331	1.1266	1.0778	3.8111	1.1747
AC073195.1	0.152	0.222	0.4688	0.2955	0.3978	0.6363	0.3362	0.4963	0.0911	0.6262	0.2233	0.3215	0.7579	1.1848	0.3784	1.5282	0.977	0.948	2.9088	0.4258	1.2218	0.7405	1.0202	4.4378	1.4111	0.1496	0.416	0.6615	0.6995	0.8646	4.0285	2.3242	0.818	1.0656	0.7527	4.5195	0.9787	1.5276	3.0075	0.6393	0.405	1.287	1.8104	0.9366	1.0188	0.1085	0.6554	1.8278	0.4653
FLJ13224	0.1761	0.0964	0.1975	0.2738	0.0987	0.86	0.3116	0.3737	0.0792	0.3906	0.4527	0	0.3512	0.5084	0.2679	1.1065	0.1572	0.2615	0.3663	0.1121	1.2224	0.7721	0.4491	1.6882	1.0811	0.6064	0.3314	0.2787	0.1907	0.738	0.9888	0.3702	0.3902	0.9994	0.5813	0.77	0.189	0.4248	0.4435	0.321	0.5162	0.8648	0.2834	0.5086	0.5097	0.2513	0.2025	0.4813	0.3893
AL137802.2	0	0.1754	0.1683	0	0	0.1257	0	0	0	0.0381	0	0.0847	0.1797	0.0347	0.1993	0.3396	0.3002	0.0357	0.1332	0.0612	0.0439	0.156	0.4836	0.9943	0.0719	0.1575	0.0822	0.095	0.065	0.2157	3.0211	0.3214	0.1521	0	0	0.1575	0	0.1448	0.8209	0.1347	0.16	0.0813	0.3866	0.6475	0.0732	0	0.069	0.2626	0.1225
AP001020.2	0.3876	0.091	0.1863	0.3875	0	1.7094	0	0.1898	0.0498	0.1842	0.061	0.205	0.4763	0.1439	0.5055	0.6263	0.0593	0.444	0.0691	0.1692	0.3035	0.7014	0.2676	0.2895	0.5721	0.2996	0.3978	0.3286	0.0674	0.2984	0.2612	0.0953	0.1578	0.3882	0.2056	0.69	0.4838	0.3339	0.2988	0.0932	0.0443	0.3657	0.1604	0.1599	0.3036	0.0889	0.1194	0.5145	0.1978
AL354993.2	0.4099	0	1.517	0.1912	0.5517	7.2067	1.5231	0	0.2211	0.4677	0.5419	1.0404	3.3726	2.9823	2.9936	1.6228	2.4592	0.5844	2.5239	0.6263	3.1451	5.7516	8.452	11.8965	1.9887	3.5492	1.5988	2.1408	0.2663	5.2276	11.1588	1.5043	3.5036	0.8211	0.7443	7.5279	2.0361	2.9662	1.5042	1.5172	2.7526	6.747	0.5542	8.7143	1.4986	0.4388	0.3535	16.5797	0.8366
AC244090.2	0.3367	0.2458	0.0944	0.2617	0.1258	0.0587	0.3723	0.1649	0.0504	0.0533	0.1236	0.2373	0.042	1.3606	0.2328	0.1586	0.1202	0.3499	0.8869	0.0857	0.1845	0.7653	0.5423	0.5868	0.2016	0.1656	0	0.2664	0.1367	2.0659	0.6805	0.0643	0.7459	0	0.2778	0.5152	0.6193	0.406	1.1505	0.2832	0.1346	2.1091	0.1625	0.0648	0.2564	0.0601	0	0.4906	0.0572
AC090527.3	0	0	0.4092	0.0946	0	0.8485	0	0.3177	0.2187	0.7709	0.1787	0.343	0.1213	0.3511	0.2692	0.0764	0.8687	0.578	0.4048	0.1858	0.7999	0.079	1.0449	2.2261	0.4371	0.3191	0.3329	0.1925	0.1317	0.1456	2.2947	0.372	0.9241	0.406	0.1338	0.7446	0.3729	0.3912	0.7001	0.4775	0.4537	1.1534	1.018	0.1874	0.5188	0	0.2797	2.216	0.331
ERICH6-AS1	0.7496	0.1796	0.2167	0.3916	0.1664	1.5034	0.2694	0.3135	0.1896	0.193	0.1892	0.289	0.6307	0.6086	0.5572	0.8905	0.2426	0.2504	0.5782	0.2147	0.3081	1.8259	0.8616	3.1642	0.1543	0.8758	0.585	0.8526	0.2092	0.9116	4.1878	2.2386	0.9936	0.5161	0.6831	1.6695	0.948	1.017	1.1208	0.3087	0.2559	3.3318	0.3845	0.6856	0.6922	0.3928	0.505	0.8706	0.5099
SLC16A1-AS1	2.8604	0.2495	0.5041	1.2714	0.4639	4.3687	1.5768	0.9269	0.2112	1.113	0.3089	1.6978	1.206	0.6679	2.3794	1.5991	0.3117	1.3054	0.8078	1.0283	6.0972	2.7562	0.2851	5.792	2.7208	1.0484	1.1945	1.5768	1.1727	3.4754	3.8309	3.6299	1.2516	2.6293	2.647	3.1588	1.2832	0.4227	2.1109	2.8159	0.8126	3.2977	0.2268	1.4984	1.2174	1.497	0.4232	3.2761	0.9729
AL109976.1	0.1722	0.0257	1.4876	0.073	1.5974	1.1465	2.9182	0.207	0.0633	1.4211	0.1466	1.8291	0.6731	8.4725	0.9352	0.9294	2.0875	0.2162	6.5504	3.665	3.1823	9.219	2.9877	22.845	0.2461	1.6093	0.8916	0.6409	1.6205	2.0734	4.9146	0.8167	1.5013	1.1286	0.2131	0.3182	6.1402	5.8139	1.951	2.337	2.9153	2.3217	2.5695	6.4467	1.0443	0.712	0.5264	0.7186	0.1597
AC098487.1	0.7167	0.4415	0.1507	0.4702	0.1005	1.2656	0.1783	0.3071	0.0806	1.8312	0	0.7106	0.6701	0.6595	0.3346	1.2666	0.7678	0.1197	1.9753	0.308	0.491	2.9679	1.3349	1.5225	0.8853	0.5289	0.8736	2.233	0.873	0.4425	1.7506	2.774	0.1276	0.4486	0.9242	9.3425	0.6592	1.4586	6.7681	0.9797	0.179	2.0025	0.5191	0.4658	0.655	0.1438	0.309	1.469	0.32
CTC-338M12.4	0.8679	0.6141	1.2016	0.6073	0.5391	1.7466	0.6024	0.9023	0.2521	1.7137	0.559	0.9884	1.0386	1.2258	1.1967	1.7745	1.0728	1.1658	0.7221	0.306	1.3025	1.0928	1.4088	4.8175	1.7033	1.7078	0.9593	2.2187	0.5638	3.0458	2.8789	1.7303	1.5089	0.8825	0.8485	0.9633	0.5527	1.0789	1.4266	0.7188	0.8112	4.1104	1.1347	1.99	2.7945	0.6003	0.2878	3.1964	0.9673
AC091563.1	36.7563	29.1853	24.2033	87.5901	6.627	12.2434	5.7242	32.8726	26.8305	22.0212	31.7688	5.8742	14.0544	0.6141	13.1908	0.6683	7.5328	15.4258	1.4749	4.8302	17.6812	1.3242	41.6429	2.9354	14.8641	8.7788	19.6505	2.4547	0.2879	5.2006	6.0519	1.2198	22.0533	5.326	13.3621	1.0851	1.1414	0.9977	0.5102	4.5232	17.9024	1.5609	26.3627	15.0875	47.0384	11.4481	11.312	19.2488	12.5413
AL117332.1	1.3231	0.2998	0.6907	0.4257	0.3582	0.6206	0.787	0.134	0.2051	0.9976	0.3518	0.8685	0.546	1.2249	0.5679	1.376	0.9286	0.4471	2.4673	0.5577	1.8502	0.6223	1.4698	5.1887	0.7378	0.4938	2.2945	1.2454	0.5187	1.1882	2.3977	2.302	0.4333	0.731	0.6777	2.5733	1.9723	1.2655	3.9882	0.9978	0.8388	6.0721	1.8063	1.2123	0.7088	0.9278	0.7868	2.0946	0.931
AL355488.1	5.3014	1.6733	5.2847	3.1094	1.7136	10.6216	1.3862	4.4896	2.1309	4.0911	4.5863	8.3269	6.6937	1.4989	5.059	2.1162	6.0296	10.4743	1.9069	2.0726	6.8528	6.8819	7.6727	20.0154	17.341	3.5743	4.7529	8.5312	1.7092	4.7468	11.8503	18.6313	5.2563	5.4026	5.7003	7.3013	3.7717	1.9179	3.3149	7.0429	4.2252	5.8611	3.1016	8.4123	7.1961	3.9386	2.6083	15.3222	5.3455
FP325330.3	0	0	0.0392	0	0.0052	0.2877	0.439	0.0046	0	0	0.0051	0	0.453	0.0807	0.0116	0.1932	0.1148	0.0291	0.062	0.0036	0.3524	0.6855	0.0375	0.7066	0.0042	0.4263	0	0	0.0265	0.9331	0.4332	0.2244	0	0.3126	0.0038	0.2689	0.2743	0.2248	0.3671	0.2508	0.1266	0.6485	0	0.1938	0.6558	0.0199	0	0.0255	0.0048
AC092803.1	0.5148	0.3588	0.6888	1.1735	0.2887	1.0284	0.0311	0.6188	0.4839	2.2468	0.2062	0.8166	1.6451	1.601	1.1457	3.2641	1.5792	1.3134	5.3344	0.4648	0.3591	2.8044	5.522	9.5439	1.934	3.8448	1.5851	1.6108	0.361	1.7442	8.8294	3.891	4.0221	0.8905	1.6608	10.2825	0.8609	2.1729	8.3589	1.3188	1.2158	2.0445	6.6434	3.2171	1.5826	0.4007	1.9169	1.9951	1.0983
AL670729.2	0.4645	0.0848	0	0	0	1.7012	0	0.1516	0.1392	0	0	0.0819	0.3474	0.2011	0.257	0	0.2488	0.2069	0.1932	0.0591	0.3394	1.584	0.3118	0.7084	2.4342	0	0.3973	1.1945	0	0.2086	1.4605	0.3551	0.0735	0.0775	0.1917	0.9139	0	0.3734	0.7519	0.1954	0.2475	0.236	0.299	0.3578	0.0708	0	0.3338	0.2539	0.237
AC005229.4	2.8911	1.904	1.9894	1.9098	1.2243	0.9309	1.3682	2.2771	1.6723	0.9033	1.225	2.5229	2.253	2.9241	2.7682	4.8399	2.5772	0.8466	7.401	1.668	2.3266	3.2699	2.8169	5.6292	2.9786	1.9095	4.233	1.4637	2.2491	3.8491	6.4023	12.5658	3.571	3.6039	2.2524	3.4209	5.8203	3.3158	4.9746	2.5168	1.2282	7.1273	4.4121	3.0598	1.1825	1.4715	1.7607	6.0331	1.3202
AL592148.3	4.6185	0.9012	1.1441	2.1936	0.9794	1.2829	2.5628	1.3487	0.9211	0.8142	1.3876	2.1135	2.1604	1.4399	1.9511	1.4246	2.1408	1.212	2.7666	0.449	1.4725	4.7616	3.3814	4.72	2.3838	1.1236	3.0854	2.5514	0.941	1.5082	2.3763	2.0029	1.3715	2.1528	3.4788	1.6301	2.4251	0.324	2.5011	5.3398	4.4032	1.5356	1.2001	1.0671	1.3814	1.6717	2.0998	1.7256	1.3709
AC008543.1	0.4196	0.0278	0.1497	0.0593	0.1854	0.6652	0.135	0.1868	0.0915	0.2538	0.07	0.4303	0.2568	0.1872	0.5275	0.2397	0.2724	0.3851	0.3385	0.272	0.3623	0.4584	0.5837	0.7313	1.5648	0.4128	0.3001	0.7545	0.1136	0.5937	1.1308	0.9332	0.5433	0.1528	0.3043	0.8005	0.0819	0.552	0.1098	0.2567	0.6098	0.2196	0.0737	0.5582	0.9296	0.2314	0.2302	1.6678	0.1427
LINC01096	0.1055	0	0.7096	0	0	0	0.7464	0	0	0	0	0.8179	1.9983	0.1827	0.0292	0.5633	0.0377	0.0313	0.4972	0.0806	1.811	1.7127	1.897	17.9232	0	0.2421	0	0	0.1142	3.6623	6.7272	4.6363	0	0.1408	0	20.2439	0.7761	0.8055	0.2656	0.414	0.1124	4.1789	0.0679	0.0406	0.0321	0.2634	0	0.1921	0
AP001372.1	0.261	0.2858	0.439	0.1522	0.1464	2.2533	0	0.2556	0.0587	0.8685	0.1438	0.138	1.2689	0.1695	2.3284	1.353	1.5378	0.872	0.1629	0.1994	0.143	1.5895	3.5211	0.7677	0.8793	0.7704	1.6074	0.697	0.053	0.1172	0.7035	1.4218	0.5577	0.196	1.2386	1.3695	0.6602	0.1574	1.4788	1.0429	13.5617	0.1989	0.063	0.2262	0.656	0.2794	0.7315	0.9273	1.1985
AC008735.2	7.1292	2.4288	5.7293	5.9121	4.0863	14.1739	3.4686	6.1287	1.7092	3.6898	5.7594	15.0781	18.2469	5.4881	6.5074	3.6582	2.5456	18.7017	3.1633	2.602	16.9293	6.4829	9.5055	22.366	18.2881	11.0663	11.6257	11.6576	1.7367	6.7578	13.5562	9.1744	11.8848	9.2017	11.3744	8.9354	9.6899	6.4002	11.8823	7.5956	10.5741	11.6689	4.2069	4.1181	12.5962	5.1718	4.1665	16.4511	11.0727
AL050341.2	7.4401	2.779	4.8748	3.9683	2.8458	4.7677	3.1377	4.8294	3.3964	5.7843	2.9545	6.465	7.6564	3.9709	6.0542	9.3495	6.4252	6.5257	7.2455	2.5113	3.8875	8.2885	10.4975	22.5422	5.6993	8.6248	5.6826	6.9478	4.613	12.3527	32.9914	40.0131	5.422	4.1296	4.5692	10.9692	6.1799	5.1816	19.637	8.0773	4.8407	55.9862	9.0778	10.1944	4.612	4.9076	6.8132	10.339	3.7074
AC099845.1	0.0634	0	0	0	0	0.2818	0.042	0.0465	0	0.0301	0.0873	0.0168	0.0118	0	0.0526	0.0747	0.017	0	0.1845	0.0484	0.3125	0.2778	0.2424	0.1657	0.185	0.1091	0.0163	0.0376	0.0515	0	0.2989	0.1272	0.0602	0.0317	0.2746	0.1039	0.0437	0.0573	0.0513	0.0933	0.0886	0.0322	0	0.0366	0.1158	0	0.0683	0.3983	0.0808
GK-IT1	1.1194	0.1226	0.3766	0.3916	0.5021	1.4055	1.0397	0.1096	0	0	0.1233	5.9186	4.0184	5.1379	1.7648	2.3209	3.9569	15.1583	0.5588	0.5986	1.4722	2.9446	7.4824	0.1463	4.525	0.4405	1.7232	6.2439	2.9085	3.5182	2.2625	1.0269	1.4881	0.4484	5.2653	4.111	0.5148	2.2948	2.7783	2.9187	2.1474	0.6823	0.2162	0.9052	1.4322	2.1565	0.5791	1.2235	6.2816
LINC00649	0.3906	0.5635	1.8822	0.8857	1.467	4.9368	4.0638	1.7668	0.4877	6.8306	0.7786	2.4192	3.2086	1.506	1.9986	3.573	2.1251	2.0464	1.7459	1.6007	9.3665	2.851	3.3927	14.7331	3.6813	4.5013	5.0107	3.0204	3.7151	7.5994	6.7125	1.5463	0.1472	2.772	1.9313	2.2972	2.4718	4.1456	2.5356	2.404	5.7088	8.043	1.4308	3.8353	0.8357	2.7007	2.6541	1.8805	1.1671
NORAD	319.725	71.0178	101.72	161.487	89.2245	168.024	167.74	130.79	56.4942	290.669	107.183	186.643	217.898	209.629	181.421	110.821	126.978	113.041	187.991	109.132	106.48	170.044	142.865	538.282	212.834	227.228	144.451	154.865	106.869	228.956	496.728	180.946	301.993	203.985	379.362	195.519	240.928	181.01	153.441	176.913	247.913	245.91	187.866	311.89	211.127	103.37	232.278	274.87	121.686
LBX2-AS1	4.7765	6.7485	8.7336	5.2967	0.3587	17.8727	4.1028	12.1125	5.7131	31.9066	6.601	16.4162	16.5061	9.843	18.013	11.8373	7.3551	24.9629	6.6349	0.7493	6.1698	12.133	11.1111	20.8776	22.6613	22.9928	29.6544	24.8776	1.1774	6.1277	8.2467	32.7907	19.034	1.2385	19.093	3.8597	9.8846	5.2972	8.4683	6.2776	19.1583	4.311	78.3882	66.5627	12.0237	11.0921	19.398	50.1125	13.8375
AC090181.2	2.1822	0.5793	1.3348	1.0025	0.1483	8.9264	0.5265	2.2667	0.8324	6.4122	2.6226	2.7972	6.7262	1.7754	4.3351	2.493	0.7084	18.9707	1.0453	0.7577	0.8697	1.2886	1.1184	2.5068	9.2673	21.8599	7.6693	8.8687	0.2148	1.7816	1.2475	5.1566	5.9656	1.4569	11.0782	4.6838	3.5277	7.5759	3.7823	1.0568	7.5589	4.0981	9.8976	3.8198	7.4334	0.9909	4.2766	4.6261	14.9789
LINC01416	0.0081	0	0.0136	0	0.0545	0.1271	0.0322	0.0159	0.0073	0	0	0.0171	0.1514	0.2735	0	0.1984	0.026	0.0505	0.4716	0.0247	1.3046	0.7022	0.0261	0.3493	0	0.0478	0.0748	0	0.0263	0.2327	0.0218	0.13	0.0077	0.0973	0.0067	0.2761	1.0576	0.2539	0.1398	0.1635	0.1165	1.127	0	0.0094	0.0148	0.0087	0.0908	1.1329	0
AC006064.2	0.3035	0.133	0.3574	0.4956	0.1362	1.5669	0.2417	0.1585	0.1092	0.2693	0.3344	0.4494	0.4692	0.4381	0.2519	0.7629	0.1084	0.4868	0.8249	0.201	0.5323	1.0844	0.4237	2.3278	0.8726	0.3185	0.2908	0.5764	0.2465	0.5815	1.0089	0.116	0.5765	0.8106	0.4509	0.6105	0.577	0.1952	0.2402	0.3234	0.2103	0.3906	0.2345	0.1636	0.2959	0.2383	0.1745	0.7299	0.2684
AL121832.3	0.5885	0.171	0.6768	0.8124	0.2694	1.6212	0.4462	0.741	0.2376	1.2559	0.9129	2.6926	1.6887	0.6033	1.4053	0.8037	5.9825	3.2957	0.0999	0.4312	1.6059	0.8308	3.3855	2.9987	2.8052	0.5081	2.2928	1.5965	0.3023	0.6256	3.3178	2.5342	2.4977	0.7457	1.7246	0.5986	0.5081	0.9849	1.672	0.687	2.6401	2.3305	2.2615	3.0942	6.0918	0.8227	0.4453	2.9276	0.4044
AC005914.1	0	0.0957	0.0735	0.034	0.0327	0.4879	0.0387	0.1142	0.0262	0	0.0321	0.0924	0.0654	0.1767	0.266	0.0549	0.1873	0.0779	0.2909	0.2449	0	0.142	0.0939	0.4952	0.1832	0.1147	0.2991	0.1729	0	0.2879	0.3534	0.4678	0.1384	0.0292	0.024	0.6115	0.0536	0.0351	0.1572	0.049	0.0233	0.0296	0.3939	2.2892	0.1598	0	0.1256	0.0637	0.0892
FOXD2-AS1	0.8502	0.194	0.9086	4.792	0.3774	7.3392	0.7991	0.6592	0.4618	25.458	1.0927	8.1101	6.4908	1.4725	8.3921	3.0214	3.3202	6.6906	2.063	0.5277	6.1924	11.6309	4.75	2.5931	25.7122	15.1773	6.3078	14.3152	3.0921	6.6962	3.9858	10.6833	8.3085	1.5963	16.9551	1.3242	8.2103	4.2291	6.9957	1.8026	3.2987	1.9073	15.5293	13.0955	21.8193	6.199	5.1162	12.4291	4.4456
AC073140.2	0	0	0.0775	0	0.2068	0.9165	0.1835	0.0451	0	0.3506	0.1016	0.1462	0.3448	0.1996	0.2678	0.1303	0.2963	0.3286	1.3423	0.2817	1.2631	0.4491	0.1856	1.386	0.704	0.5442	0.5204	0.0547	0.1497	0.6624	1.056	2.0616	0.3064	0.1385	0.2283	0.1814	0.2544	0.5003	0.796	0.1163	0.1474	3.1378	0.3561	0.2663	0.1264	0.3947	0.2385	0.655	0.0941
AC009299.2	0.1758	0.0413	0.169	0.0879	0.1549	0.4206	0.2167	0.1968	0.0903	0.2985	0.1799	0.2922	0.5073	0.2284	0.1876	0.509	0.148	0.649	0.303	0.1727	0.5369	0.7098	0.8902	0.9851	0.7109	0.7785	0.3738	0.4472	0.1224	0.5301	0.2539	0.3889	0.2385	0.4528	0.5286	0.6425	1.213	0.4847	0.9353	0.3803	0.1807	1.4802	0.4245	0.3773	0.2296	0.0941	0.1841	0.6727	0.3717
AC011370.1	0.0187	0	0.1888	0	0	0.0196	0	0.0733	0	0.0178	0.0206	0	0.014	0.1134	0	0.1234	0.1203	0.05	0.0467	0.0286	0.8613	0.0182	0.211	3.6933	0	0.3866	0.0576	0.1999	0	0.5041	3.9333	2.1885	0	0.5434	0	0	0.0344	0.2256	0.2423	0.2833	0.1197	0.3612	0	0.7782	0.0171	0	0	1.7793	0.42
AL449423.1	0	0	0.4296	0	0.1146	0.1069	0.1356	0	0	0.1942	0.1125	0	0.2292	1.4156	0.3391	0	0.4377	0.182	0.7649	0.5463	0.2239	0.6967	2.3037	1.736	1.2848	2.0101	0	0.3637	0	0	0.2753	0	1.4551	0	0.0843	0	0.1879	0.1232	0.882	0.3437	0.0817	0.8303	0.9865	0	1.4004	0.1093	0	0.335	0.3127
AC108156.1	0.5543	0	0.0777	0.7542	0.2072	0.3867	0	0	0.3323	0.1757	0	0	0	0	0.23	0.0871	0	0	0.2306	0.0706	0	0.18	0.5208	1.57	0	0	0	0	0	0	0	0	0	0	1.9061	1.4542	0	0	0	0.1554	0	0	0	0.1067	0.0844	0	0	0	0
AL662791.1	1.542	0.7676	0.4716	0.4904	0.4716	1.7603	0.186	0	0.2521	2.6653	0	1.186	1.4678	1.2141	0.2327	4.0958	0.1502	0	1.1663	0.9638	0.7682	1.7756	2.1451	8.0629	1.3853	0.6896	1.8704	0.8319	0.3415	2.8954	19.0791	3.6973	4.6592	0.7019	3.4706	3.4936	0.9025	1.1834	1.059	0.9433	0.6723	1.9938	0.9476	0.9717	1.153	0	0.4835	4.4437	0.7152
LINC01569	0.6704	0.7155	0.9634	0.6828	0.3426	2.0955	0.5855	0.6399	0.3357	3.4525	0.5983	0.7089	2.475	0.6687	1.1829	3.2789	0.9635	1.9731	0.6565	0.3306	0.5952	2.2735	1.6401	4.692	2.7137	0.9183	1.3325	2.0041	0.5168	1.6307	5.4656	0.8076	1.0314	1.1047	1.5756	2.059	1.4985	0.4093	1.2912	0.5924	1.8924	1.4224	2.3434	2.8429	1.0159	1.2806	0.9	2.6434	0.7446
AC008115.3	1.6998	1.1523	2.6549	2.7375	1.7247	5.082	1.1815	2.3782	1.6011	8.3105	1.6051	1.1128	4.6614	1.8927	2.5524	7.8578	1.9943	0.9375	6.5323	2.1642	6.2987	4.4953	1.043	13.6494	11.7072	1.3538	3.9876	7.013	0.723	2.6895	11.8891	5.1052	3.6126	7.2953	2.9392	7.7505	2.5312	3.9045	2.1838	3.1319	3.5586	2.9604	2.0322	1.6832	3.9206	5.8913	1.6751	3.9815	2.5603
AC016065.1	1.7569	1.0615	2.1145	1.3777	2.1062	2.3773	1.8289	1.7207	1.3345	3.8444	1.5684	3.2995	2.8546	3.8827	4.5874	7.7513	1.7198	2.5773	10.8116	2.5455	10.6572	6.9062	3.7326	10.0181	2.4899	2.7716	2.7825	5.3568	5.2761	3.754	9.8987	11.6195	12.8293	4.6413	3.6998	14.2442	3.1204	3.9635	10.6243	5.4017	2.9541	9.4017	4.607	6.2117	2.3946	5.0092	4.2445	8.4765	3.3071
AC010996.1	0.1248	0	0.175	0.1456	0	0.6531	0.0552	0.0815	0.2993	2.0964	0.3667	0.484	0.2178	0.1802	1.7264	0.3529	0.1783	0.4078	0.5885	0.2225	0.684	0.8513	0.3016	1.9037	0.8597	0.2456	0.5552	1.2346	0.473	0.5231	4.9902	0.4294	0.7112	0.25	0.5837	1.5827	0.6123	1.0537	0.3143	0.665	0.3991	4.9458	0.1607	0.4807	0.6464	0.0891	0.6817	1.9557	0.4245
AC112484.1	0.9099	0.317	1.0782	0.4582	0.7421	1.017	1.0427	1.3771	0.2975	2.0444	0.6606	1.1809	0.9589	5.8382	1.2183	1.5007	4.2308	0.5895	3.1139	1.2321	1.9038	3.2236	0.3664	2.7572	1.3747	1.8106	1.5281	1.2517	0.6381	3.3612	3.2323	1.1619	2.2975	1.6774	2.5086	1.6816	4.4125	2.2443	3.4143	0.9219	1.7852	5.273	0.0998	1.0034	2.6079	0.8189	0.6419	2.5542	0.5275
DLGAP1-AS2	2.032	0.1688	0.6718	1.3892	0.2515	8.4319	1.4876	1.1941	0.5292	9.1257	1.6365	4.6979	5.3663	9.8793	10.4661	4.002	4.7587	2.8092	4.8735	0.3747	0.9984	5.4479	2.9232	4.0668	16.4039	8.7412	12.1681	5.8879	1.7866	12.5723	21.6791	1.9445	3.6995	1.0104	3.3654	3.6212	6.1869	9.4808	107.846	1.556	1.9155	7.9871	11.5024	3.1894	2.459	3.2249	9.8967	4.1972	11.053
AL358472.3	2.0345	1.4071	1.8912	1.3736	1.6812	2.8012	1.7051	2.5169	0.2888	1.6287	1.5335	4.1898	2.6428	1.762	2.7545	3.2295	3.3264	2.4804	2.049	1.227	1.643	5.2165	5.3468	3.0794	4.0402	3.6872	3.8465	4.1939	1.2173	2.0194	10.6777	4.0521	1.5253	1.7157	2.0325	2.5281	3.0531	0.7748	7.8579	1.8914	3.8517	4.2427	5.9972	4.7009	1.8593	0.8023	1.662	2.575	1.4203
AC232271.1	1.6531	1.183	1.8996	1.4125	1.3766	1.4387	0.9556	2.0037	0.5151	1.8049	1.4425	1.5059	2.9869	1.3608	1.82	0.7096	0.7539	1.7645	0.5038	1.5629	1.9912	2.7429	8.5024	3.5517	3.6612	0.5314	1.4111	3.3607	0.4918	1.852	4.6759	3.0969	2.2382	1.5244	1.0941	2.4904	2.4388	0.9869	3.3737	2.2579	1.727	4.9387	1.2802	2.8931	1.8548	2.33	1.1291	5.5999	2.2713
AC010422.2	0.4199	0.5364	0.4708	0.2448	0.5494	2.0504	0.65	0.4112	0.1888	0.0665	0.7709	0.074	1.0468	1.5152	1.8583	1.1872	0.9745	0.3117	0.9898	0.3742	2.2243	1.1591	0.9018	0.8233	0.5029	0.9639	1.1492	1.6611	0.0568	0.3771	1.886	1.5248	0.4652	0.7008	1.2128	0.7343	0.8368	0.6751	2.1146	1.5305	1.6222	2.1329	0.3379	0.4042	0.8954	0.2996	0.4827	2.3713	0.2856
CRTC3-AS1	0.2322	0.6102	0.3124	0.4332	0.1562	1.652	0.1848	0.4093	0.4175	0.9711	0.3069	0.4419	0.5209	0.5228	1.5798	0.3939	1.144	0.3723	0.6181	0.1419	0.6107	0.4977	1.0845	1.7603	1.1263	0.4568	0.8578	0.7164	0.0377	0.7923	4.1298	1.5442	1.2787	0.465	0.3832	1.0354	0.3844	0.28	0.5512	0.2343	1.262	0.8963	0.4035	0.8047	1.1458	0.2982	0.1602	1.0151	0.9002
PKP4-AS1	0.3783	0.0911	0.3627	0.1059	0.28	0.4908	0.2008	0.2075	0.0748	0.2877	0.1834	0.272	0.4526	0.8517	0.4834	0.5775	0.2512	0.647	0.8308	0.3063	0.7877	0.9066	0.3412	4.7172	0.7544	0.3573	0.5901	0.404	0.1044	0.9783	0.3364	0.3297	0.3089	0.6212	0.5369	0.3572	1.6073	0.593	0.3266	0.2864	0.4717	4.3963	1.1396	0.6293	0.5877	0.1215	0.2022	0.3721	0.5866
AC079160.1	0.1252	0	0.2105	0	0.1303	0.9074	0.1779	0.0088	0.0161	0	0.0098	0	0.7889	3.3213	0.0742	0.6403	0	0	2.4841	0.0273	1.8714	1.9771	0.8855	5.2001	0	1.073	0	0.6048	0.2613	1.6939	2.6622	1.9375	0.6367	0.4655	0.0148	5.0654	0.0329	1.9513	1.1866	0.7519	0.0143	4.9587	0	0.2066	0.0735	0	0	2.0618	0
AP005329.1	0.418	0.2289	0.2461	0.39	0	0.2187	0.1109	0.3685	0.0752	0.159	0.2303	0.3537	0.7191	0.1086	0.9366	0.1576	0	0.8566	0.2435	0.0319	0.0916	0.6517	0.101	0.4918	0.9013	0.5758	0.3003	0.645	0.1697	0.6382	3.4363	0.2397	0.4367	0.2093	0.276	0.9322	0.3845	0.2017	6.9927	0.3516	0.9357	0.1274	0.2422	0.0966	0.2674	0.5817	0.3244	0.4113	1.0664
AC021851.1	0.59	0.336	0.6947	0.3578	0.397	2.6423	0.7829	0.7165	0.3395	1.2115	0.364	1.9466	1.112	0.7562	1.8212	1.1344	1.6432	2.3549	0.5498	0.5228	2.0951	1.6555	2.946	3.887	1.9717	2.2522	0.6782	1.5125	0.2108	1.1232	4.7702	2.2191	2.1514	1.3235	1.3049	6.16	1.107	1.1384	1.4262	1.4888	1.6035	1.8701	0.9799	1.7722	1.1431	0.6315	1.8315	6.578	1.4688
AC211476.2	0.3766	0	1.1085	0.8784	0.7039	2.2331	0.0833	1.4753	0.2257	0.7757	0.6915	1.1947	1.5491	0.7067	2.6042	0.7099	0.1345	1.6776	0.8877	0.2877	3.5772	1.59	2.022	2.6255	3.2703	0.741	0.9019	2.3838	0.2039	1.8037	1.0995	1.7274	0.6556	0.5657	1.8647	1.3172	1.1546	1.1354	3.7254	0.8447	0.9031	1.7217	0.7879	0.3626	2.8107	0.4703	0.7036	1.578	1.0887
MIR4453HG	3.0663	1.6221	3.6252	2.5394	1.3954	3.627	2.0049	3.5543	1.3851	2.4784	2.0888	2.4123	4.4092	2.7453	1.9421	4.1324	1.3011	3.1541	4.6337	1.5616	3.3119	3.2617	6.788	16.1101	3.4731	5.4067	2.326	4.7116	2.6943	3.7113	7.8046	5.4356	2.2084	2.8333	2.7993	6.9945	2.6703	5.0553	6.65	2.2303	1.1604	11.2264	6.7799	4.7916	3.3302	2.1562	3.0016	4.7279	2.6147
SH3RF3-AS1	15.2653	0.1517	2.6096	3.1986	0.6214	0.6378	1.1396	1.2753	0.2242	0.4214	0.9156	0.3516	2.5486	2.6873	1.4483	4.8567	1.2464	0.4443	1.5904	0.2328	0.334	1.0797	5.9128	31.5073	1.0204	0.9267	2.0188	1.6769	1.6422	3.8563	0.7093	2.065	1.5522	7.6574	1.6919	16.0982	4.1535	2.606	0.8969	1.4215	1.5059	2.702	1.7657	2.0484	2.3294	2.1943	1.29	3.9368	3.9858
AL603832.1	0.9897	0.3251	0.2497	0.1154	0.111	3.0034	0.1313	0.5816	0.267	0.2823	0.3271	1.6746	1.3324	0.0857	0.2464	0.7462	0.6361	0.9699	0.1647	0.5292	1.4101	0.7714	0.7971	3.3638	1.6893	0.4869	1.5237	1.4096	0.1607	0.711	0.6668	1.7024	1.7857	1.1894	2.777	1.5578	0.5462	0.4774	1.4953	1.1655	0.1582	0.4022	0.0956	0.1143	1.4472	1.1653	0.4267	2.0555	0.4039
AC090159.1	0	0	0.0927	0	0	0.8077	0	0	0	0	0.0607	0.1166	0.0412	0.0477	0.1373	0	0.2953	0.0491	0.1376	0.0421	0	0.3223	0.0444	0.8649	0.3962	0	0.1132	0.1963	0	0	0	0.0632	0.2618	0	0.2275	0.5062	0.0507	0	0	0.0928	0	0.112	0	0.1911	0.1008	0	0.1426	0.4219	0.0563
ACAP2-IT1	3.4778	0.1411	1.2999	2.1781	1.5889	3.7739	1.3673	2.4599	0.4053	3.1837	1.348	1.7708	4.8649	1.5617	1.3361	1.5782	0.8969	3.3279	1.3395	1.9679	1.3411	6.4004	2.6453	8.6713	2.9507	5.069	1.4542	3.5925	0.6798	4.6847	1.215	0.1477	1.7124	3.3537	6.1653	4.1393	12.1432	4.8153	0.973	2.8711	2.9344	10.3379	0.8085	2.9017	5.0029	1.3097	1.2217	2.6751	2.3657
MIR205HG	0	0.0138	5.8134	0	60.0336	0.9371	112.577	0.6424	1.2815	0	0.2779	33.7611	2.0566	150.108	0	87.724	0.6351	4.3715	93.0734	83.8898	223.503	120.882	0.0203	102.873	0.0907	0.0124	0.0259	10.7489	90.7478	39.4197	0.034	34.9899	0.5749	118.915	0.9681	64.3432	31.1617	27.426	102.515	176.686	0	60.7292	5.6881	0	0.2767	0.0135	2.1427	0.7307	0.3732
CENATAC-DT	3.0393	0.5816	0.8189	1.9959	1.3567	4.9094	2.7017	1.5316	0.2653	2.6648	0.6826	1.0297	1.5007	3.9866	4.7747	6.6189	1.0747	0.5784	4.6398	2.4345	1.7464	1.265	4.8717	4.0886	3.1014	3.4546	1.6959	1.3658	1.3178	2.1464	8.2308	1.455	2.9982	1.3297	1.6072	1.2772	3.3382	2.8467	1.1464	1.8615	3.9154	2.9078	2.9063	5.1816	2.1034	3.0319	1.0177	4.4188	1.2043
SNHG20	1.3798	1.0953	1.1175	1.2771	0.7614	3.2925	1.2981	1.4443	0.5251	1.5199	1.1662	0.8492	1.982	1.7956	3.7681	0.9358	1.2513	2.7643	4.1909	0.6581	4.6328	4.1895	2.6458	3.0252	2.7217	2.7437	2.555	4.3496	0.8299	3.6911	4.3974	1.532	2.468	1.6961	1.94	1.2161	2.565	2.4123	3.2696	1.6396	1.5814	4.0793	2.4321	2.2013	3.8564	1.2893	1.6493	5.0434	3.5904
AC092718.8	0.0768	0.0505	0.0905	0.0538	0.0172	0.209	0.0612	0.0752	0.0691	0.2483	0.0508	0.13	0.1494	0.0798	0.102	0.1883	0.0988	0.2464	0.1918	0.0822	0.5221	0.2545	0.1238	0.9039	0.5383	0.1361	0.2208	0.31	0.0374	0.3036	0.2485	0.3348	0.1897	0.277	0.1902	0.3426	0.2827	0.315	0.3814	0.1034	0.1842	0.359	0.1335	0.2308	0.2106	0.0493	0.2385	0.4031	0.1568
U47924.1	0	0.2243	0.5167	0	0.1148	3.1072	0.2717	0.1003	0.0921	0.876	0.6768	0.758	2.374	0.4434	0.2549	0.0965	0.329	0.7298	0.9371	0.3129	1.7956	1.2969	0.9896	2.1415	1.5637	0.6044	1.0509	0.4861	0.1663	0.1839	1.3798	0.5871	0.9723	0.6152	0.676	0.5372	1.1301	0.7409	2.431	0.5168	0.3274	1.0402	0.8899	0.828	0.655	0	0.5297	0.3358	0.8358
AC008393.1	1.9255	0.9037	0.9767	0.499	0.5141	1.0234	0.9328	0.9578	0.6045	2.0338	0.606	0.8403	1.4401	1.6146	1.4202	1.5267	0.3274	0.4357	1.3731	0.607	0.6699	1.4889	2.2399	3.3559	1.2355	0.7517	0.9097	1.9588	0.819	5.7637	6.0541	3.4346	1.7123	0.7346	0.4288	1.2026	0.9276	1.2531	2.9354	1.2854	2.0277	10.7122	1.0034	1.377	2.039	1.6029	0.4744	3.0735	0.5301
AL009031.1	0.9064	0.7006	1.4349	0.7772	0.1495	0.3068	0.1415	1.201	0.5992	0.1014	0.558	0.0282	0.5383	0.0923	0.1991	0.1256	0.1142	0.0475	0.0887	0.0407	0	0.1299	0.2791	0.5575	2.3469	0.1574	0.3283	0.1582	0.0649	0.1436	0.1078	0.3974	0.1266	0.1335	0.286	0.5245	0.049	0.6429	0.0575	0.3139	0.0852	0.1625	0.0515	0.1848	0.1462	0.1997	0.046	0.1166	0.0272
LINC02585	2.2673	0	1.3348	1.5864	0.5085	7.8291	2.4068	2.2205	0.2038	4.7418	1.2489	2.3976	2.8827	2.1599	6.0205	1.9232	3.4002	6.0599	4.9043	0.866	4.7213	1.3254	7.1213	1.7782	5.0919	3.792	4.4212	4.3054	1.1046	1.2216	14.3594	5.4599	7.9661	0.6811	5.426	2.9739	2.5024	0.2734	1.7127	0.7628	2.5372	4.3764	10.2898	4.9767	8.4953	1.9414	1.7595	7.187	2.776
AP001469.3	1.6589	0.2992	0.952	0.8421	0.5472	2.859	2.3048	0.8601	0.2632	3.1169	1.1395	1.9194	1.6202	2.6536	2.8017	0.7909	2.4878	4.0165	4.8061	1.1331	4.1068	3.3846	2.059	8.3677	8.0998	4.5697	3.8458	3.0575	0.9191	2.5939	3.4977	3.0437	2.5204	2.9707	1.2562	5.3501	3.8054	4.6364	8.1507	1.4282	1.3104	7.0783	1.3003	0.3157	1.9976	1.5667	0.6563	2.1119	1.3342
SCAMP1-AS1	2.8459	1.3937	2.438	1.6388	0.9317	3.1537	2.3924	2.9689	1.4621	3.6464	2.0252	2.5889	2.4656	9.6061	3.9897	4.3065	1.8083	2.0551	7.7428	1.168	3.0803	5.0375	5.3598	6.2041	3.4617	5.0954	3.8189	4.7727	2.1817	10.8497	3.7635	4.9662	5.0272	1.7701	1.9766	1.878	8.2021	4.9134	3.157	3.2338	1.7167	12.6424	5.3425	3.7677	3.9174	5.5434	1.9205	5.0429	2.6332
LINC00501	0.0434	0	0.0913	0	0	2.4318	0.0576	0.0213	0	0.9291	0	0.4594	0.9746	0.0376	1.0634	0.0409	0.0233	1.0449	0.1626	0	0.0238	1.2697	0.105	0.0852	0.761	0.9829	0.914	0.9538	0	0.039	0.1463	0.0249	0.1856	0.0435	1.5415	0.4843	0.0599	0.2095	1.2188	0.1827	0.2257	0.331	0.2517	0.5018	1.191	0.1162	0.7491	1.5907	0.4875
HOTAIR	0.0171	0	0.7325	0	0.1149	3.8959	0.0906	0	0	0.2111	0	1.8422	0.4854	0.3994	3.9256	2.0603	0.0732	0.9738	0.6536	0.013	8.8349	0.7155	2.242	12.4796	22.6606	0.2688	1.7879	1.7432	0.208	0.4448	6.0066	0.5092	1.8164	6.2767	0.8738	0.3808	0.5027	0.1442	2.8199	0.6895	2.1842	2.6199	3.7436	6.7478	1.1706	0.2376	7.9228	4.555	0.697
FMR1-AS1	0	0	0.0313	0	0.0418	0.0974	0	0.0729	0.0167	0.177	0.041	0.0591	0.0835	0	0.1081	0.0526	0.0798	0.0166	0.0155	0.0427	0	0.0726	0.03	0.4624	0.4181	0	0.0191	0	0	0.1505	1.1791	0.1494	0.1768	0.0559	0.0768	0.0488	0.0171	0.0674	0.0201	0.0626	0.0595	0.208	0.2697	0.086	0.2212	0.0199	0.0161	0.2238	0
OR2A1-AS1	0.3861	0.0769	0.2214	0.0409	0.059	0.1286	1.2809	0.0859	0.1105	0	0.1933	0.3341	0.2756	2.7967	0.233	0.1158	0.6392	0.2189	2.2048	0.0939	0.327	1.4706	0.0707	0.7571	0.3153	0.3971	0.2342	0.3749	0.2708	0.5674	1.8447	0.7245	0.35	0.1582	0.2897	0.1151	1.5658	0.7619	0.4735	0.4429	0.1403	0.7489	0.0508	0.3852	0.0962	0.0188	0.0605	0.9592	0.0716
AC110769.2	0.2297	0.1886	0.1931	0.1674	0.3541	1.3217	0.0762	0.3655	0.1032	0.4093	0.1581	0.2732	0.5797	0.5967	0.3335	0.6764	0.3383	0.2046	1.218	0.2412	2.4541	1.2307	0.6242	1.501	1.1089	0.3672	0.5009	1.0903	0.0466	0.6445	3.2107	1.4814	0.4634	0.4312	0.2369	0.4142	0.9505	1.3155	1.6419	0.1932	0.2983	2.4206	0.7484	1.0613	0.5509	0.5838	0.3465	1.3493	0.4979
AC093895.1	0	0	0.0614	0	0.0546	1.6817	0	0.0954	0	0	0.0268	0	0.6556	5.4618	0	1.9277	0.6782	0.0434	2.7551	0.1674	4.2166	4.7923	0.3334	2.2599	0	2.4196	0.4248	3.5835	6.2282	3.7611	3.5437	6.6735	1.5492	0.5121	0.1005	4.4714	7.3458	5.6379	4.8876	1.3927	1.3235	11.8989	0.047	2.6724	0.7789	0	0	2.9011	0.2236
PACERR	1.2389	0	0.0906	0.2513	0	0.1691	0.3574	0.0528	0	0.1024	0.0593	0.2848	0.8863	0.2332	0.3129	1.0153	0.1154	0	0.8515	0.1234	0.3542	0.3674	0	1.4082	1.3065	0.212	1.5479	0.895	0.1312	0.387	1.3065	0.803	0.3069	0	0.8446	1.625	0.1982	0.1299	3.8947	0.2718	0.0431	0.1642	0.4681	0.0622	0.4923	0	0.2787	1.0009	0.6046
CHROMR	8.1642	1.3115	2.5642	3.1342	0.7603	4.6602	1.5353	2.4651	0.9709	0.8375	1.8605	1.9534	3.6284	2.855	1.6709	9.7188	1.5873	1.1502	4.705	1.1847	12.1605	5.1184	5.8461	18.5052	1.6776	2.1009	1.5542	3.739	1.5593	5.1077	4.4859	8.9571	2.2321	4.6551	1.2899	13.6374	14.1331	5.6693	2.8083	4.7295	1.1001	10.0183	0.9016	2.5749	1.6733	4.5495	2.7795	7.9389	2.3155
AC010275.1	0.0787	0	0.1323	0.0917	0.3528	0.6584	0	0.2311	0.0707	0.5234	0	0.1663	0.8824	16.2797	0.3916	11.4158	0.0843	0	10.9278	0.4206	12.9303	9.6555	3.2305	1.3366	0.1413	10.6785	0.0807	0.8401	9.6437	5.6505	8.4789	2.4352	0.4481	1.2602	1.0385	8.5626	0.6511	6.4497	7.9786	3.5725	0.4401	22.3734	0.1519	2.1808	0.3594	0	0.2035	12.9818	0.4815
AC073529.1	0.0888	0.0695	0.0854	0.1036	0.128	0.1593	0.1178	0.1242	0.0912	0.3618	0.1398	0.0671	0.2846	0.3406	0.1684	0.3826	0.8561	0.2826	0.4644	0.1551	0.2503	0.5562	0.2963	0.3151	0.6952	0.4493	0.4297	0.3312	0.103	0.3532	0.4445	0.6983	0.6264	0.5463	0.4397	1.0316	0.42	0.566	0.3559	0.4161	0.2535	0.7346	0.2327	0.6009	0.2087	0.095	0.3172	1.0816	0.1424
THAP9-AS1	17.4237	4.8697	9.9107	9.7353	7.1063	20.6644	13.3034	12.6595	4.3706	11.3658	11.2674	26.0564	43.2053	19.8949	22.2158	17.6598	17.8631	19.2778	24.2579	10.6003	24.4906	31.1555	14.8138	64.3911	27.1827	28.0893	16.7104	75.4597	12.3508	20.4026	47.5433	23.9091	20.0101	16.2137	37.0396	30.8473	16.3786	32.1147	23.6347	17.7499	24.7203	29.817	13.7018	17.502	10.2338	10.655	15.3028	20.1499	21.8201
MCM3AP-AS1	1.5606	0.3593	1.0963	0.7807	0.6215	1.647	1.1531	1.1116	0.3548	3.0768	0.9231	0.994	1.3396	1.0943	1.5967	0.936	1.0449	1.5287	2.1911	0.7722	3.6153	1.5465	1.3319	6.4099	4.8153	4.0523	2.7985	1.3892	0.648	1.7718	2.9932	1.6422	1.4525	1.7804	1.2001	1.8842	2.3488	3.8442	1.5981	0.7906	1.3644	4.2475	0.9462	0.5071	1.8112	0.9918	0.8716	2.4958	1.0676
AL133390.1	0.0694	0.076	0.2042	0.1214	0.0389	0	0.1381	0.0679	0.0936	0.0989	0.1146	0.0734	0.0778	0.3305	0.1439	0.3923	0.0372	0.0618	0.4618	0.053	0.1521	0.2704	0.2514	0.3628	0.0935	0.1706	0.178	0.1647	0.1127	0.0935	0.1402	0.6365	0.2306	0.1737	0.0573	0.4095	0.2233	0.0837	0.1872	0.1167	0.0555	0.3877	0.2345	0.1202	0.0951	0	0.0299	0.3792	0.2832
LPP-AS2	5.2354	0.802	2.3195	2.6711	0.9086	1.4185	1.1578	1.6023	0.7145	3.2439	2.0598	1.071	3.2629	3.7919	3.2583	4.0091	1.7025	0.6247	3.2667	0.9641	2.3908	5.6777	1.5184	16.2536	0.7699	8.094	2.9265	2.1267	1.5309	2.6586	3.2754	2.7159	1.1689	2.8867	2.9575	6.2334	8.0111	4.7727	2.724	2.6999	1.7561	11.4132	3.626	2.9881	2.6486	2.4182	2.1228	3.3041	2.6868
AL133230.1	0.436	0.2228	0.3829	0.5649	0.4672	0.7198	0.1671	0.5124	0.3484	0.4329	0.2241	0.2049	1.1448	0.2937	0.6994	2.931	0.5293	0.82	0.1612	0.1702	0.9556	1.0666	0.6554	1.6843	1.4969	0.6862	0.6761	1.2763	0.3933	1.4268	0.953	0.8888	0.8372	0.3687	1.2712	0.9403	0.5346	0.5608	0.6273	0.823	0.7821	0.7972	0.3181	0.7611	1.9832	0.9229	0.4929	0.4553	1.1071
AL391684.1	0.9632	0.3535	0.8583	0.674	0.2803	1.6671	0.4629	0.7241	0.337	1.5393	0.3843	0.4845	0.6815	0.9695	1.0931	0.5153	0.435	0.8025	0.6238	0.5608	1.9858	1.4965	1.1699	4.2061	1.6511	0.4098	1.1008	1.273	0.3129	1.0707	3.2625	1.2658	1.1075	0.9125	0.7176	2.199	1.4702	1.4692	0.6686	0.9854	0.2539	3.1579	0.9402	0.7038	1.5607	0.73	0.4579	1.1155	1.0094
KLHL7-DT	0.8803	0.2851	0.3024	0.6218	0.0278	0.7395	0.1481	0.5222	0.2787	0.8133	0.0956	1.3505	0.5935	0.5691	0.3292	1.2621	0.2656	0.011	0.8046	0.0663	0.4213	1.1114	2.5064	2.5609	0.1671	0.0488	0.4708	0.2649	0.594	0.3229	9.4401	0.3839	1.7544	1.1672	0.4502	1.9191	0.1368	1.2111	0.2409	0.5632	0.6145	3.061	0.898	0.1146	1.1558	0.637	0.417	4.9875	0.291
LINC00243	0.1842	0.2017	0.1205	0.0477	0.1148	0.9853	0.1086	0.2005	0.0184	0.0389	0.0451	0.0433	0.0919	0.2482	0.1868	0.5595	0.1316	0.0729	0.9366	0.1251	0.7852	0.6581	0.2308	0.2141	0.0736	0.0604	0.084	0.2672	0.0332	0.4412	0.0276	0.2817	0.1361	0.082	0.2534	0.2148	0.866	1.0121	0.2872	0.1894	0.2454	3.0361	1.4429	0.6148	0.1309	1.3802	0.1412	0.0895	0.1671
AC025575.1	0	0.0895	0	0	0	1.0257	0	0.08	0.0734	0.1553	0	0	0.0611	0.0707	0.949	0.077	0.2625	0	0.2718	0.1248	0.9848	0.2388	0.3947	0.1068	0	0.4822	0	0.6787	0	0.8803	0.4403	0.0937	0	0.0818	0.9438	0.9643	0	0.4926	0.7052	0.0687	0	0.4979	0.1578	0.4719	0	0	0	0.2679	0
AC008556.1	0.4575	0.4532	1.6488	0.5589	11.0907	0.2735	17.2853	1.2587	0.6855	0.0828	0.8159	10.9651	4.7898	9.6403	0.6327	19.4425	5.0636	0.4852	17.4888	11.765	4.2258	12.1613	0.2807	22.1252	0.3718	0.3858	1.2744	0.3102	6.0494	32.2384	12.9451	10.8163	1.1377	20.0475	0.9168	0.1143	20.2758	21.0155	5.877	7.9888	0.6443	29.8984	7.299	10.7962	0.657	0.4896	0.695	8.3576	1.5781
LINC01775	0.2396	0	0	0.1397	0.2687	1.3787	0	0.4692	0	0.6832	0	0.5067	0.3583	0.5187	0.1988	4.7414	1.1548	0.1067	1.9931	0.6405	2.6256	0.5835	0.2894	2.3486	2.6901	0.3535	2.2128	0.7108	0.1945	1.1832	1.6141	0.6868	3.981	1.1995	1.4827	2.1995	1.7627	0	0.6463	1.7128	0.6702	0.9735	1.2723	1.3838	0.9852	1.1538	1.0328	1.7021	0.1222
AL355999.1	0.4444	0.3893	0.2616	0.4664	0.2492	0.651	0.2359	0.1306	0.0799	0.169	0.1958	0.5639	0.7644	1.5779	0.5163	1.0471	0.476	0.3167	1.331	0.2716	1.4124	1.1257	0.6442	3.0787	1.0379	0.5246	0.8666	0.3164	0.2887	0.7981	4.7307	1.7326	0.3376	0.534	0.2567	1.6903	1.2262	0.7503	1.5346	0.3738	0.3907	1.5801	0.9011	1.6942	0.4873	0.1903	0.2682	0.9715	0.2721
AL354743.1	0.1277	0.1748	0.1879	0.3165	0	1.0356	0.0635	0.3283	0.1579	1.0167	0.4572	0.6077	0.0836	0.0276	0.3444	0.0301	0.171	0.5546	0	0.0122	0.0175	0	0.0386	0.1043	0.3728	0.5339	0.0328	0.0758	0	0.1577	0.1506	0.0549	0.1213	0.0639	0.0527	0	0	0	0.0172	0.0269	2.0797	0	0.2158	0.1106	0.3063	0.3588	0.1101	0.4711	0.0651
DYRK3-AS1	0.2843	0.2075	0.0398	0	0	0.5949	0	0.0464	0.0852	0.3603	0	0	0.0709	0.1641	0.1966	0.4465	1.015	0	0.6306	0.0724	0.5712	0.877	0.3815	0.6193	0.0426	0.3263	0.4376	0.3374	0.2308	0.1276	1.5322	1.3582	0.2699	0.427	0.2737	1.7399	0	0.1714	0.7158	0.1992	0.0757	0.6257	1.2352	0.6568	0.4763	0.0507	0.2451	0.1036	0.1934
ZBED3-AS1	0.5426	0.4527	0.7844	0.6779	0.0232	1.0219	0.0206	0.625	0.3113	0.2358	0.2903	0.0328	0.17	0.094	0.2873	0.1144	0.0637	0.2095	0.2192	0.0296	0.4078	0.6797	0.181	2.1615	0.4526	0.3431	0.3076	0.4017	0.0126	0.2065	0.9887	0.6785	0.1766	0.0854	0.275	0.5964	0.0333	0.1246	0.2035	0.1152	0.221	1.0105	0.1472	0.5044	0.4415	0.2102	0.049	0.6156	0.1424
AC107032.3	0.0684	0.0374	0.2012	0.0399	0.0383	0.5723	0.0454	0.1004	0	0.5199	0.0753	0.4338	0.1023	0.3553	0.2553	0.0644	0.0366	0.0305	0.1138	0.0261	0.5245	0.5662	0.3028	1.8321	0.2457	0.1682	0.1403	0.3246	0.0833	0.2149	1.1055	0	0.2597	0.1369	0.5642	0.269	0.283	0	0.2951	0.2875	0.1913	0.382	0.132	0.2369	0.4061	0.0366	0.1179	1.0462	0.1046
NDUFB2-AS1	0.1348	0.1476	0.1587	0.283	0.0907	0.1975	0.5367	0.2641	0.1697	0.282	0.0594	0.4848	0.363	0.6539	0.4475	0.4575	0.3466	0.6486	0.6057	0.4326	0.9457	0.3415	0.2389	0.564	0.3149	0.5571	0.4151	0.352	0.5912	0.5812	0.4724	0.9276	0.5121	0.4321	0.5341	0.3891	0.3968	0.5203	1.3677	0.4763	0.4311	0.904	0.5728	0.3427	0.7886	0.4906	0.3023	0.5011	0.2201
AC079305.2	2.4999	12.1209	17.8015	8.7459	0.498	0.7744	1.1566	15.5273	11.3414	0.4221	18.0638	0.6957	0.4674	1.4528	0.3548	0.6665	0.8104	0.3517	1.2999	0.7789	1.2077	1.0095	0.9404	1.6984	0.8421	0.5501	0.7765	0.8003	0.3472	2.0382	3.5238	0.5469	0.8121	0.8894	0.2036	1.359	0.5597	1.7453	0.7277	0.7194	0.3812	1.32	0.7623	0.589	0.6463	0.3345	0.3687	0.8269	0.4363
FAM157C	0.8786	0.0341	0.2096	0.218	0.3703	0.5346	0.3886	0.4882	0.0336	0.3258	0.4324	0.8829	0.466	1.5055	0.1499	0.646	1.148	0.0555	0.5754	0.871	1.6799	2.228	0.3212	1.4498	0.347	0.4046	0.1535	0.0666	0.2378	0.6938	0.9152	0.1215	0.1361	0.287	0.3959	0.1716	2.4012	0.834	0.9145	0.3721	0.2341	0.8166	0.6498	1.0582	0.5353	0.2334	0.3385	0.8922	0.2225
CDKN2B-AS1	0.1219	0.0334	0.1428	0.0558	0.0708	0.4144	0.0809	0.0831	0.0744	0.1221	0.1918	0.4281	0.4541	0.7501	0.3232	0.0759	0.3077	0.2579	0.7134	0.0914	0.1741	0.8884	1.4074	1.0725	0.7214	1.4752	0.038	0.8265	0.0707	0.0919	0.4252	0.0799	0.434	0.1351	0.4633	0.0771	1.0708	0.1128	0.667	0.432	0.1287	1.0413	0.2732	0.0453	1.0282	0.1421	0.2946	0.3568	0.3819
LINC01494	0	0	0.1479	0	0.0493	1.7018	0.175	0	0	0.1671	0	0.2324	0.1644	0.0761	0.2918	0.0829	0	0.0783	0.0366	0.0672	0.8671	0.8565	0.4602	4.654	0.1579	0.0432	0	0.0522	0	0.1974	0.9477	0.0504	0.0417	1.2325	0.0725	1.9602	0.0404	0.053	0.0474	0.1109	0.1054	0.2233	0	0.0508	0.1607	0.0941	0.0379	1.4894	0.0897
AC107214.1	0.6064	0.5578	1.3872	0.7072	0.3536	1.3706	0.2253	0.8077	0.4144	1.3605	0.6146	0.59	0.9796	0.7143	0.3221	1.1431	0.6236	0.6267	2.1593	0.315	1.5951	1.2998	1.641	5.105	1.1331	0.6921	0.9709	1.7561	0.6106	1.0892	3.1706	2.42	0.8292	1.1903	0.3803	3.818	0.6247	1.7259	0.7068	1.5914	0.4266	2.7354	2.0144	0.9808	0.4877	0.4154	0.8157	1.6704	0.891
AL133467.4	0	0	0.0515	0	0	0	0	0	0	0	0	0	0.4584	0	0	0.0578	0	0	0	0	0	0	5.7263	0.1602	0	2.8342	0	0	0.0498	0.055	0.2478	0	0	0	0.0506	0.0804	0	0.887	0.0661	0	0	0.0623	0	1.9827	0	0	0	25.9956	0
AL445531.1	0.0257	0	0	0	0.2884	0	0.4095	0	0.0231	0.0978	0.0283	0.3263	0.1154	0.4677	0.2561	0.0485	0.0826	0.0229	0.2781	0.1965	0	0.5763	0.1036	0.1008	0.0231	0.0506	0.0264	0.3357	0.2715	1.1085	0.0347	1.445	0.0977	0.206	0.1273	0	1.4192	0.4652	0.0833	0.3028	0	0.9406	0.0745	0.0891	0.0235	0.1101	0.0222	0.9276	0.0262
AL356417.2	0.3244	0	0.0455	0	0.0606	0	0.0717	0	0	0	0	0.1143	0.8086	0.0468	0.2243	0.2038	0.1737	0	0.4048	0.0826	0.1185	0.158	0.2612	0.7067	0.0971	0	0	0.5775	0.0878	1.7963	0.1457	1.6738	0	0.379	0.0446	0.7091	1.79	1.1735	0.5834	0.773	0.0864	0.1098	0	0.6246	0.0988	2.4881	0.1398	0.65	0
AL135784.1	0	0	0.3132	0	0	2.1215	0	0.0405	0	0.0787	0	0.175	0.2785	1.6125	0	0.117	0.2659	0	2.7195	0.0632	3.7186	2.9429	0.2666	4.7056	0	0.4071	0	0.5893	0.6048	7.0599	0.8921	1.2811	0.0786	1.1188	0.0341	3.202	3.6153	0.6986	0.8484	0.8701	0.3969	6.1372	0	0.7648	0	0	0	2.4423	0.2533
AC027601.5	0.6288	0.165	0.4462	0.3972	0.1983	0.2879	0.1738	0.5004	0.1296	0.1806	0.3031	0.7066	1.1513	0.624	0.9784	0.5803	0.0912	1.1147	0.7085	0.3853	3.2738	0.5233	1.8412	2.7315	1.3417	0.3673	0.4235	1.3761	0.1755	0.5	1.8095	0.8188	0.311	1.0364	0.6487	0.8936	0.7109	0.3792	2.1207	0.2865	1.1415	2.1761	0.3795	2.6714	1.0237	0.1823	0.2711	2.234	0.4278
AC008770.3	3.1335	2.2876	3.2742	2.4361	1.4908	5.2661	2.1419	3.0688	1.8782	8.124	1.6737	1.707	1.1363	2.1381	2.3638	0.7159	0.712	1.7765	0.474	2.4662	6.3482	2.4054	4.053	1.6136	5.3739	2.896	3.5084	2.8174	0.8481	1.876	2.815	0.98	2.6149	0.3804	3.6046	1.6191	2.2707	2.5192	0	1.837	3.4155	2.7975	1.0086	1.7552	3.4711	1.1179	2.1288	3.2175	1.647
ZNF674-AS1	4.4161	1.2137	1.5002	1.8581	1.3206	1.3048	1.7695	1.9505	0.8719	2.5518	1.8697	2.5639	3.536	3.0297	3.1472	2.5136	3.3392	4.243	4.4665	0.5556	1.955	2.4804	13.8358	2.3544	7.8255	3.8165	3.1638	4.9329	2.1797	6.4386	7.001	7.6855	4.3416	2.2025	1.8865	3.8843	5.6227	2.9656	7.6813	2.0831	2.8794	5.6829	8.0269	4.6417	2.6906	1.9463	2.0458	5.4329	3.6047
AC112496.1	1.2652	0.1732	0.133	0.8299	0.1773	1.2411	0.1049	0.5421	0.0711	0.7517	0.2613	1.4215	3.016	1.0957	1.4435	0.8198	2.5411	7.3969	0.3947	0.3624	2.3399	2.3112	2.0378	1.2403	3.6937	0.4668	0.8115	6.2877	1.1557	1.8462	0.959	0.4534	0.7509	0.3959	3.85	2.2817	1.3818	2.1932	1.3653	1.7958	1.0745	0.4017	0.9162	1.0048	2.0234	1.6927	0.75	1.6422	2.9851
AC078906.1	0.6126	2.2563	9.0858	3.1821	0	0.1165	0	3.545	1.7523	0.1059	6.9936	0.0589	0.3748	0.627	0.1386	0	0	0.0496	0.0463	0.0425	0.4883	0.217	0.583	3.2029	0.1001	0.3835	0.2858	0.3305	0	2.4504	3.4518	0.5747	0.1586	1.0596	0	6.6469	0.3585	0.0672	2.4639	0.8431	0.0445	1.6407	0	0.0643	0.4071	0.0596	0.048	0.7304	0.2273
AC083880.1	0.8306	0.4548	1.1177	1.1624	0.9315	1.5645	0.3307	0.7321	0.2987	0.7896	1.2811	0.7027	0.7455	1.5106	0.896	1.5657	1.2457	1.184	2.2805	0.3807	4.0966	0.9711	1.4717	6.2975	1.1193	0.4086	2.046	1.6759	0.8094	0.5221	3.2459	7.239	1.4198	1.6636	1.0282	1.3074	1.3751	3.3055	3.0477	1.5371	0.332	6.0758	4.652	2.5909	1.3664	0.3556	0.7878	3.1777	0.5085
ODC1-DT	0.9558	0.3109	0.3741	0.7615	0.0743	0.6733	0.3641	0.4912	0.2382	0.8186	0.2189	1.2609	0.2336	4.8517	1.9553	0.6243	0.8414	0.725	8.487	0.1084	0.3837	1.466	1.2727	1.7689	2.7373	2.281	1.7968	0.7188	0.1998	0.4929	3.3027	1.3564	1.5816	0.3032	1.7259	1.7501	6.5364	1.3466	0.4595	0.191	0.711	3.1245	2.522	4.6353	0.6832	0.5267	0.6936	2.8238	0.4924
AC007497.1	0.4753	0.2602	0.2665	0.5543	0.0888	0.9118	0.3153	0.6982	0.2849	0.3765	0.1745	0.1675	1.0664	0.2058	0.5259	0.5226	0.0849	0.9174	1.1203	0	2.1704	1.0033	0.8293	1.9674	1.0674	0.6235	0.2439	2.4443	0.5146	0.3557	6.618	1.2717	1.5796	0.0793	0.3922	5.5067	1.8943	0.1911	6.1548	3.5979	0.7598	2.6557	0.153	0.0915	0.2172	0.3391	0.2732	2.511	0.4041
AC004943.2	1.7396	0.2632	0.8991	1.0475	0.4682	1.8269	0.2854	0.9293	0.4436	3.097	1.0314	1.4249	1.4619	1.5559	1.9212	3.9826	1.1452	0.7608	1.5315	0.8118	2.3711	2.6317	1.3501	6.334	3.9665	1.7861	1.714	2.6427	1.2636	2.0394	4.2194	1.2332	1.5137	1.2796	1.8897	5.6338	2.8567	2.1436	1.1946	1.5058	0.7079	4.6464	3.5672	2.0316	1.266	1.0291	1.7891	2.828	1.1166
AL031587.3	0.6005	2.6903	4.3618	3.1196	0.9183	2.2279	0.7968	2.3525	4.6138	0.0519	2.8868	0.6928	0.49	1.9385	0.4077	0.3602	1.0526	0.2432	1.5897	1.2928	2.0942	1.4361	0.2198	2.0695	0.2452	0	0.056	0.7127	1.4629	0.8334	0.2943	0.5008	0.2074	2.0775	0.1802	1.0025	2.611	0.395	0.6481	0.8725	0.0436	1.6084	0.2109	0	0.0998	0.1753	0.0941	0.8951	0.2785
AC008105.1	0.2326	0.0637	0.3749	0.226	0.3477	0.3245	0.1029	0.3606	0.1045	0.0737	0.1494	0.4714	1.2465	0.7049	0.8523	0.6758	0.0208	0.4317	1.3866	0.3109	0.9983	1.7938	2.0134	3.4707	0.6268	0.858	0.1591	0.506	0.1416	1.4445	4.5963	2.289	0.4049	0.1941	0.7037	0.6609	1.3903	0.7245	2.6561	0.4075	1.3013	2.5989	0.0749	0.2463	0.8678	0.9749	0.0668	4.9993	0.3164
AC026771.1	0.3212	0.2345	0.8105	0.1249	0	0.5602	0.4263	0.5244	0.1925	0.3054	0.3539	0.3397	1.6017	0.4637	0.4443	0.8074	0.2294	1.6218	0.0891	0.0818	1.1736	0.5216	0.8624	1.9596	1.7315	0.2107	0.9891	0.6354	0.0869	1.1539	3.4631	1.3507	0.7118	0.3217	1.4139	1.545	0.5909	1.1622	0.5778	0.6305	1.1983	0.5439	0.8272	0.3711	0.7829	0.1146	0.6463	1.0534	0.3278
WDFY3-AS2	3.3102	0.9465	1.5218	1.1963	0.3835	0.5069	0.8003	1.1768	0.9906	1.1332	0.5232	0.5022	0.7424	0.6087	0.3113	0.3088	0.1068	0.2285	0.6085	0.3918	0.4112	0.9116	0.9715	3.4083	0.3029	0.8364	0.5215	0.4791	0.1774	0.5928	1.8879	0.659	0.3924	0.2949	0.7878	0.7039	0.712	0.5212	0.3793	0.5952	0.243	1.0952	0.2614	0.2853	0.2344	0.549	1.0033	0.7164	0.2859
SNHG17	3.7546	1.6298	1.9471	3.686	2.8407	12.097	4.6679	1.9987	0.9394	3.1262	3.8298	10.6594	9.689	8.352	9.2095	9.7445	8.1122	9.2214	10.0308	3.2586	11.8301	5.2766	6.4047	15.1954	15.5814	13.5959	7.6336	11.2673	4.6509	11.5697	9.197	10.7658	14.1293	6.6843	9.317	9.1297	6.191	7.6505	15.0675	5.8704	7.8319	7.2317	6.6304	11.341	8.9062	5.9213	7.9041	10.4017	5.6792
HNF1A-AS1	0.1332	27.3375	47.735	28.4136	0.3094	102.816	0.2651	59.2585	19.8527	47.1015	24.7029	23.2201	21.4597	0.173	25.4283	0.1614	12.0764	77.114	0.0633	0.0436	0.2085	0.6767	95.0085	0.3482	32.2032	32.7314	38.0316	20.3468	0.0155	0.1282	0.3077	0.1091	44.2765	0.1715	58.9855	0.4243	0.0963	0.0574	0.1027	0.152	21.2854	0.2126	6.9543	15.3213	63.5391	7.6676	16.7595	95.2245	32.3051
AC091043.1	0	4.7267	4.2901	3.2032	0	3.9007	0	6.533	9.4371	2.3314	5.7277	1.5561	0.5136	0.085	1.0582	0	3.5728	5.8556	0	0	0	0	5.6883	0.2565	6.6975	5.8872	11.377	0.6986	0	0	0	0	3.1672	0	2.3477	0	0	0	0	0	2.0388	0.0997	22.1658	3.1732	5.4687	0.525	1.8609	3.6457	2.4022
AL034550.3	0.2103	0.0987	0.3285	0.3504	0.0337	1.6663	0	0.2648	0.054	0.3142	0.0662	0.4448	2.5618	0.3383	0.3989	0.623	0.4828	0.7763	0.6499	0.1148	0.1647	0.5855	1.0889	4.2418	0.3779	0.8573	0.4934	0.214	0.0244	0.3238	3.482	2.7219	0.2568	0	0.5951	1.5764	0.1658	0.4348	0.4864	0.1516	0.1681	0.5189	0.8704	1.1108	0.8787	0.3216	0.1554	1.051	0.5825
AC110611.2	3.2214	0.4523	0.6947	0.3371	0.6484	0.3457	0.3288	1.3752	0.1485	0.3141	0.5915	0.3931	1.1429	0.9657	2.6731	2.0241	0.3539	0.3312	1.3057	0.2208	0.1811	1.0462	0.8315	4.2109	1.6695	1.0564	1.7379	3.039	0.436	2.2624	0.6678	4.6412	1.3334	0.6204	2.2835	2.1127	1.8993	1.2949	1.6045	1.2158	0.5282	0.7552	0.9571	1.1451	1.472	4.0226	0.6766	1.8509	2.739
AC096642.2	0.3108	0	0.2091	0.2174	0.1394	0.4552	0.0825	0.1826	0.0559	0.1182	0.1369	0.3286	0.4648	0.5921	0.4642	0.3515	0.5992	0.0554	0.362	0.2849	0.4087	1.3322	0.6007	1.3811	1.005	0.1834	0.3827	0	0.2523	0.2233	1.1725	0.4989	0.5902	0.1867	1.6413	0.3261	0.6288	0.5247	0.7378	0.3659	0.2484	1.2628	0.3001	0.1436	0.3408	0.5322	0.268	0.6114	0.1902
AL512625.2	0.3436	0.209	0.3211	0.089	0.9419	0.0799	2.1277	0.2991	0	0.0363	0.0421	0.5652	0.2855	4.8934	0.2218	1.943	0.2045	0.034	1.4928	0.6999	2.5942	1.897	1.8755	3.3935	0.0343	0.6761	0.0392	0.2266	0.465	6.034	9.0543	3.9839	0.4713	0.2294	0.0945	2.003	6.812	7.2281	0.5356	0.5459	0.061	4.3828	0.7004	0.1764	0.0698	0.8581	0.0988	0.1669	0
AC009271.1	0.0379	0.0415	0.6162	0.0589	1.6149	0.119	0.3017	0.0742	0.0227	0.012	0.2922	1.1755	1.6816	4.3212	0.0839	1.1429	1.326	0.0338	15.7427	0.386	13.4013	2.6214	0.1221	9.0816	0.0227	0.1864	2.7744	0	0.2462	5.218	0.5277	3.6792	0.06	2.0366	0.0313	12.1281	8.0397	3.6559	3.517	3.3681	0.9188	18.0303	0.0366	0.0584	0.0808	0.0541	0.9149	8.2016	0.0258
AC010148.1	0.0207	0.1927	0.6008	0.1328	0.1161	2.1777	0.0824	0.2636	0.0465	1.378	0.1483	0.438	0.333	0.7442	0.5499	0.6245	0.8096	0.2583	1.7056	0.2056	0.0113	1.2811	4.1443	4.5205	0.1581	1.0186	0.4463	0.3564	0.0504	1.0879	0.4046	0.3087	0.4228	0.3525	0.5212	2.3494	0.2952	0.487	0.7598	0.3832	0.4138	1.8303	0.5299	0.4067	0.3312	0.0222	0.1964	2.9991	0.2747
AC073896.4	0.3308	0.2415	0.0927	0.1286	0.1237	0.3462	0	0.324	0.1983	0	0.3644	0	0.2474	0.764	0.6405	0.7275	0.7087	0.0982	0	0	0.4834	0.4297	1.4209	1.2973	0.3962	0.5424	1.2449	0.5235	0.2686	0.5941	3.4176	1.138	1.0471	0.1104	0.455	0.4339	0.7099	0.7979	0	0.2783	0.4407	0.4481	0.213	0.8917	1.0077	0.118	0.0951	0.6027	0.45
AC139887.5	0.0768	0	0.1723	0.1195	0.0287	1.3937	0	0.1003	0.023	0.1948	0.1693	0.1625	0.4789	0.0444	1.1052	0.0724	0.1372	0.2966	0.0213	0.0391	0.3088	0.2495	0.4744	0.6027	0.2761	0.252	0.2103	0.3344	0	0.207	0.2761	0	0.8999	0.1282	1.1414	0.168	0.2356	0.0927	0.2211	0.1077	0.7575	0.6505	0.3463	0.5326	0.2341	0.0822	0.1988	0.5039	0.3136
LINC01506	1.1828	0	0.0711	0	0.0947	0.0884	0	0.1655	0.076	0	0.1861	0	1.4533	0.2195	0.0701	0.1592	0.724	0.9785	0	0	0.0926	0.0823	0.068	0	0.1518	0.0831	0	1.103	0.686	0.7587	0	0.5813	0.4011	0	0.2092	0.6649	0	0.1019	0.6382	0.6396	0.3377	0.515	0.0816	0.0976	0.3088	2.8032	0.7285	0	0.6034
AL024508.1	0.0939	1.5159	1.5786	1.1492	0.6052	10.066	3.6737	0.9881	0.7172	3.6802	1.2407	13.2991	1.9127	2.6212	4.2638	1.6364	10.179	25.5649	3.5527	0.4302	0.2057	1.2344	25.0372	4.3858	5.7331	15.3504	8.0188	2.9796	2.1147	1.1799	10.2438	3.3632	12.6329	1.4333	7.2222	6.155	0.3453	0.6791	6.8365	2.3682	9.5086	0.8581	8.2468	7.1831	4.0955	0.5525	8.922	10.6432	2.1546
AL021578.1	1.3162	0.2745	0.8961	1.8273	1.3355	4.5254	1.497	0.9208	0.6762	1.2513	2.1405	1.4582	3.6564	5.4282	1.9244	9.5698	2.6856	4.5789	0.6257	1.197	0.7556	3.603	3.483	2.1302	5.518	6.3514	3.2164	3.4963	0.967	1.6323	1.0135	2.8031	8.6302	2.2596	12.2587	1.3976	0.7494	1.1338	4.3966	0.8435	2.9559	0.7004	1.1499	0.8689	3.2077	1.0734	1.189	1.7813	6.3952
HMGN3-AS1	2.3833	0.3469	0.8627	0.774	1.4379	3.6461	1.3411	0.7387	0.5154	5.0476	1.2463	3.6529	1.681	5.9832	1.7899	1.379	1.2765	0.887	1.8197	1.1062	4.0008	2.7777	2.0045	6.0732	1.3009	2.5822	2.539	1.6291	1.7638	1.8694	8.2526	3.373	2.3921	1.7825	1.805	1.3058	4.5784	2.7104	6.7068	1.8017	2.5682	2.314	2.2723	0.8365	1.9575	1.1786	1.1576	2.8854	1.8161
AC104041.1	0.0186	0.1629	0.4692	0.0289	0.0487	1.7448	0.5017	0.2125	0.1783	0.0118	0.2117	0.295	0.0278	0.3704	0.3858	1.0866	0.1195	0.0939	2.9911	0.3315	5.007	2.5486	3.4097	2.0905	0.0111	0.7135	0.0127	0.0515	1.1677	4.3809	12.6379	2.2035	0.0235	3.5941	0.0102	5.4068	1.4082	2.3397	3.9468	2.5809	1.0257	5.5355	0.018	0.1934	0.0963	0.1062	0.0321	3.0422	0.1012
GLYCTK-AS1	0.3195	0.4198	0.4836	0.6334	0.1433	1.1032	0.4663	0.7822	0.0862	0.4859	0.4575	0.2365	0.2867	0.1107	0.1591	0.2409	0.2053	0.1992	0.1063	0.1708	0.2801	0.249	0.3087	0.167	0.7749	0.1572	0.2951	0.3792	0.0519	0.2869	0.2583	0.0366	0.2124	0.128	0.6064	0.2095	0.0882	0.3082	0	0.1344	0.6384	0.2921	0.5244	0.2214	0.6715	0.5813	0.2755	0.8032	0.326
CD27-AS1	10.3911	1.9084	3.7297	6.0969	2.1147	11.3495	2.9682	3.2097	1.7773	4.2158	2.6075	1.5678	8.6663	7.8728	4.7268	6.4963	3.5385	3.1631	21.3907	2.2055	6.6707	9.0851	3.9067	31.0252	3.5399	7.4722	4.9653	3.2414	0.623	7.1592	1.5772	9.8279	12.5225	7.3974	4.2822	10.0984	7.0333	5.5675	6.7788	3.9927	4.1062	19.3428	8.5646	7.5423	7.1787	4.3708	1.9961	7.9606	5.122
AC024230.1	0	0.0104	0.1672	0	0	0.0396	0	0	0	0	0	0	0.1628	0	0.0079	0.0981	0	0.0084	0.2284	0.0072	0	0.2306	0.0534	3.1186	0.0085	0.1677	0	0	0.0154	0	0.3444	0.0434	0.872	0.9196	0	4.2592	1.0013	0.0228	0.1226	0.1991	0.1286	1.2503	0	0.0109	0.0173	0.0101	0	0.3311	0
AL390957.1	0.1628	0.0819	0.1517	0.1642	0.0444	1.1742	0.1577	0.0948	0.0198	0.297	0.0727	0.2141	0.6451	0.2515	0.3323	0.6927	0.3771	0.5411	0.3881	0.0538	0.7476	1.7365	0.6167	2.9683	0.7274	0.3031	0.6775	1.3371	0.1572	0.245	0.6404	0.323	0.2967	0.2071	0.7227	1.5585	0.1012	0.26	0.5651	0.2961	0.0352	1.2608	0.7267	0.2135	0.2534	0.1272	0.6071	0.8707	0.3592
TMEM147-AS1	2.2404	0.9003	1.8843	1.7067	1.3373	1.1533	2.2896	1.8668	0.666	3.9076	1.1843	1.882	2.7499	2.8948	3.246	19.745	2.9612	1.7304	2.2548	1.3802	6.218	3.9785	5.6168	7.428	5.4375	3.2085	3.375	3.045	1.4525	4.1456	8.278	9.4894	2.2991	2.1079	2.9747	2.3818	4.7694	3.2901	8.2284	2.4164	2.1519	14.079	2.6432	2.2857	3.674	1.2377	1.6826	11.9979	2.1385
DUBR	2.5233	0.1207	0.3244	0.8625	0.348	0.7041	0.331	0.3551	0.2321	0.0772	0.5272	0.3496	1.3796	1.6226	0.4717	1.4433	0.1709	0.1266	0.5646	0.6957	4.803	3.2751	0.8689	1.2549	0.1537	0.7932	0.9555	0.4819	0.8431	1.2059	1.958	2.5576	0.6279	0.7203	0.5337	2.2026	1.1844	2.5602	0.82	1.2124	0.2991	5.5512	0.196	0.3719	1.7706	0.773	0.2101	1.5693	0.5741
LINC01989	0.0346	0.0379	0.0873	0.0404	0	0.9416	0	0	0	0.0329	0	0.0366	0.1035	2.0981	0.1723	0.1305	0	0.0925	0.0288	0.0793	0.0379	0.5732	0.0279	0	0.0933	4.5627	0	0.0822	0	0.0622	0.0466	0	0.0657	0.104	0.0286	0.1362	0.0637	0.1669	0.1494	0.1456	0	0.6329	0.0334	0	0.1581	0.1111	0.0298	0.1135	0.1059
AL132800.1	1.2242	1.4747	1.4872	0.9835	0.8237	1.5799	1.1732	2.4112	1.5164	5.8576	1.2587	1.2083	1.8413	3.3691	3.104	2.4871	0.8014	0.6059	2.2294	1.3404	1.9231	2.5313	2.0157	2.6138	1.112	3.2385	1.8428	1.2431	1.1818	2.272	6.5069	2.2461	2.7125	4.032	4.1758	1.9982	2.5021	3.0182	2.2899	1.6361	4.0664	3.4133	4.3081	1.6343	1.3798	1.0191	0.8914	2.2451	0.569
AC006206.1	0	0.0144	0.7062	0	0.2943	0.5629	0.1567	0.0514	0	0	0.0867	0.2497	0.7261	0.1136	0.0762	0.2844	0	0	0.6877	0.2405	1.9125	2.5439	0.8559	6.1914	0.0118	0.4131	0	0.1869	0.0639	0.9779	2.8111	0.1505	0	1.1562	0.0433	0.3098	1.5929	0.1266	0.4106	0.7173	0.2832	1.8794	0	0.3183	0.7674	0	0	1.807	0.2276
AC125611.4	0.0747	0.0117	0	0.0249	0.0359	0.4576	0.0425	0.0104	0	0.0203	0.0705	0.0677	0.0718	0.0462	0.0885	0.1709	0.0571	0	0	0.0652	0.1052	0.1351	0.0601	0.3207	0.2108	0.1469	0.2299	0.0253	0.052	0.1245	0.1869	0.1957	0.1418	0.0641	0.0528	0.1539	0.0196	0.2058	0.0921	0.0269	0.1961	0.2276	0.1957	0.1109	0.0585	0.0913	0.0644	0.0583	0.0544
AC012615.1	0.7526	0.9366	1.0358	0.9575	0.5755	1.4319	0.8171	1.0386	0.6459	1.1708	0.7914	0.9768	1.3049	1.1851	1.7884	2.0313	0.9161	1.8287	5.1515	0.7056	1.8372	0.9666	2.8929	2.2806	2.3664	1.7165	2.3173	3.0857	0.75	2.3041	3.6418	2.2361	1.2994	1.1648	1.468	2.6474	2.0452	1.1551	3.618	1.4963	1.8321	2.9889	3.7658	1.2252	1.8758	1.7209	2.1534	2.8793	1.117
AC022784.6	0.0795	0.1741	0.2006	0	0	0.4991	0	0	0.1429	0.6801	0	0.8407	0.5946	0	0.7256	0.3746	0.9367	0.2833	0.9259	0	0.0871	0.3098	0.1921	0.5196	0.857	0.6257	0.1632	1.4152	0	0.0714	1.0712	1.3674	1.3588	0.0796	1.6401	0.5214	0	0.5752	0.6005	0.2675	0.1271	0.6461	0.2303	2.2042	0.0727	0	0.754	2.4331	0.1622
AP003071.2	1.212	0.0492	0.604	0.2094	0.0503	0.4227	0.1191	0.1319	0.1211	0	0.5439	0	0.0671	0	0	0	0	0.08	0	0.0343	0.0984	0.0875	0.1808	5.8089	0.2419	0.2208	0	0.1065	0	0.2419	0	0	0	0.3147	0	8.3605	0	0.0541	0.4844	0.3776	0	0.0456	0.0867	0.1037	0.041	0.048	0.0387	0	0.0458
AC099518.4	0.0337	0.0369	0.0567	0.0786	0	0.9526	0.179	0	0.0303	0.2564	0	0.0713	0.1513	0.0584	0.6155	0.0953	0.6862	0.5707	0.0281	0	0.1109	0.1643	0.2172	0.0881	0.3332	0.4312	0.173	0.3601	0.1095	0.0606	0.1363	0	0.4482	0.0675	0.6121	0.1769	0.031	0	0.1092	0.0851	0.3234	0.1028	0.1302	0.1558	0.2465	0.0722	0.4652	0.1843	0.1376
RBM26-AS1	3.0802	1.1315	2.4023	1.0822	0.6643	0.9917	1.1964	1.5856	1.6746	1.7331	1.8416	1.0997	0.5759	0.7638	0.7373	0.5211	0.6698	0.5277	2.245	0.548	1.5941	1.058	0.7262	5.4459	0.5203	0.7446	1.2159	0.9373	0.2191	1.2412	3.3613	0.2264	0.6062	1.2391	1.1732	0.5611	1.2773	0.3016	0.5682	1.5279	1.0417	2.9621	0.3368	0.1445	1.0466	0.7819	0.7945	1.5611	0.4231
C2orf27A	1.3288	0.2608	0.2003	0.2558	0.0351	1.115	0.3826	0.3376	0.1803	2.9494	0.8631	0.3049	1.711	1.0802	0.3537	2.6465	1.0205	0.1452	2.8211	0.9097	2.5554	0.971	0.9894	2.1712	0.8615	2.2816	2.4831	1.5026	0.8398	4.9813	5.2112	8.6177	2.47	1.2679	3.2845	3.5926	2.231	1.3832	1.6842	1.144	3.3718	0.745	2.0336	2.6285	3.2593	1.6302	1.4322	3.2406	0.6715
AC132872.2	0.0375	0.0617	0.1105	0.1532	0	0.0589	0.0996	0.1103	0.0169	0.0357	0.0413	0	0.2386	0.1788	0.1557	0.0707	0.0804	0.1505	0.2654	0.0143	0	0.1646	0.801	0.1717	0.2023	0.0739	0.1156	0.1114	0.0457	0.0843	0.3793	0.2152	0.0535	0.094	0.1239	0.2215	0.1726	0.1132	0.4455	0.1578	0.03	0.7245	0.3805	0.1518	0.5488	0.1004	0.0485	0.2051	0.4404
LINC00519	0.3329	0.0456	0.035	0.097	1.0732	0.3919	5.5212	0.1223	0.0748	0	0.1834	0.44	0.6535	40.3955	0.3107	5.7255	0.0891	0.1112	11.3545	4.4182	3.1466	16.8241	0.134	0.5439	0.1121	0.0409	0	1.3827	1.2839	18.6829	0.1682	0.668	0.3161	0.7084	0.206	0.3275	77.5348	9.6843	5.0741	2.0649	0.0998	10.4834	0.2411	0.1923	0.6464	0.7571	0.4664	1.4099	0.4245
AC087442.1	0.8923	0	0	0.2081	0	0	0.2368	0	0	0	0	0	0.5339	0.3091	0	0.5046	0.1912	0	0.1485	0	0	0	0	0	0.6413	0	0.3663	0	0.2898	0.3205	0	3.8884	0	0	0.4418	0.2341	3.1188	0.2152	7.1261	1.8014	0	0.5439	0	0	0.1631	0.382	0	0.3902	1.6389
ZNF213-AS1	1.1085	0.6802	1.1171	0.9918	0.5072	2.7298	0.9383	1.3913	0.5556	2.2014	0.8246	0.9566	1.8582	0.8	1.8027	2.1105	0.9759	1.1181	1.1448	0.8054	2.6183	2.1445	3.0784	4.4969	1.9573	0.9809	1.4352	2.4233	0.9285	1.5819	3.2407	1.4684	1.1161	1.1611	1.7665	2.9497	2.0713	0.9757	3.3962	1.2217	1.8078	4.7538	1.5502	1.2806	1.3915	1.4865	1.1344	3.0535	0.962
AC008610.1	2.1484	0.9906	3.3284	1.7143	0.634	5.5611	0.4501	2.5471	0.61	1.7199	0.4983	3.4677	3.721	1.9586	3.3779	1.1723	1.0901	3.123	0.4704	1.2957	5.329	2.8644	8.1049	6.3558	10.7674	1.1125	1.3926	8.0521	1.1936	3.8587	12.0373	4.5383	3.1139	2.6044	1.773	0.4449	1.248	2.5908	4.637	1.712	2.7116	8.0413	2.1838	5.0947	10.1271	3.3887	1.0725	12.2362	1.846
AC068707.1	0	0	0.141	0	0	1.8132	0	0	0	0.0266	0	0.0591	0.209	0.0726	0.2783	0.0527	0.0299	0.0498	0.0698	0	0.0306	0.0817	0.045	0.3653	0.0502	0.385	0.0574	0.1327	0	0.1004	0.5273	0	0.4512	0.028	0.3921	0	0.0771	0	0.0905	0	0.3351	0.3407	0.1889	1.4853	0.0766	0.0897	0.0482	0.3971	0.1141
AP001505.1	3.4106	3.0758	3.712	4.7963	1.6874	2.5192	2.6621	3.8315	1.6234	3.8144	3.6468	3.0763	5.7018	2.6931	8.657	3.4035	6.2324	7.8646	27.0399	1.9158	16.0515	3.323	7.1093	23.0784	4.2354	6.5136	10.0895	8.691	3.7469	8.8281	4.4607	9.6626	5.3344	5.2237	5.9603	13.5522	4.8899	7.0162	12.0162	7.6782	8.4995	9.9872	4.8432	0.8112	6.6922	6.1199	3.6329	20.0656	5.4246
AL022322.1	3.5042	0.7811	1.4084	1.0126	0.313	7.3985	0.9464	2.0652	0.474	3.9208	1.9473	10.1333	13.8462	0.8326	9.5984	2.3089	7.74	16.0243	0.6708	1.2792	0.3739	2.2358	9.4405	3.851	11.0597	6.1934	11.5533	2.5027	0.3022	1.3367	4.931	4.6585	6.0662	0.9938	11.2091	1.5863	2.0251	1.1593	2.7442	0.626	9.6674	2.5204	5.7194	6.2337	11.5062	1.2613	3.7168	11.1521	5.3157
KCNMB2-AS1	0.0562	0.0513	0.1733	0.0437	0.105	0.9898	0.3107	0.2568	0.1431	0.0178	0.2063	0.416	0.9386	2.4332	0.1477	1.2534	2.5381	1.2432	6.4359	0.2719	3.5001	8.267	5.9812	1.8975	0.0421	1.6309	0.0481	0.2779	0.8745	3.7762	7.2565	4.2421	1.2273	1.4256	0.2705	19.7896	4.9271	12.5588	28.4404	1.5991	2.5303	13.8246	0.0362	3.7868	1.4037	0.0501	0.1373	3.7058	0.086
AP000251.1	0.0541	0.1776	0.5911	0	1.0913	0.1697	1.076	0.3177	0	0.0514	0.6551	2.2868	0.6874	0.4214	0.2692	4.7385	0	3.0344	5.937	0.6195	1.659	1.1588	0	8.1975	4.6137	1.3297	0	0.2566	0.2195	3.01	14.6427	7.1293	0.0513	1.4076	0.2231	7.871	3.3812	1.2387	2.217	1.2278	1.0371	2.4715	0.1044	0	1.9268	0	0.3263	0.0591	0
AL731569.1	0.7702	0.3024	0.7577	0.4237	0.2282	1.3838	0.2892	0.6262	0.2613	0.9118	0.5603	0.3688	0.3587	0.4531	1.0612	0.63	0.7783	0.8286	0.8342	0.4662	0.8441	1.1893	1.4278	2.0516	1.7362	0.2573	1.1037	1.1556	0.3776	1.057	1.5861	1.3665	1.3661	0.4802	0.8395	0.7243	1.5103	0.6309	0.8782	0.8678	0.6389	2.3178	0.4771	0.7051	0.5312	0.6688	0.6015	1.3343	0.7414
LYRM4-AS1	3.6508	0.3236	0.6493	1.4784	3.0465	1.4463	1.834	0.9242	0.4371	7.213	0.7876	1.4213	1.3759	6.9426	2.6498	5.9832	2.808	0.5605	5.5671	2.7598	3.7714	1.8946	2.5564	3.3393	1.9695	2.0444	4.6372	1.3576	1.3235	1.6778	9.8904	2.2954	1.0138	2.1859	3.5713	7.0265	1.9901	1.8622	4.3204	4.1452	2.7811	9.7808	2.7705	1.9051	1.6029	1.4691	2.2521	8.4187	1.099
AP000553.1	0.0813	0.2226	0.1026	0.0474	0.3648	0.5105	0.1079	0.1195	0.0366	0.116	0.1792	0.4299	0.4865	0.0704	0.5735	0.6131	0.1742	0.326	0.203	0.3106	0.6684	0.2377	0.8186	1.2224	0.4383	0.24	0.3756	0.193	0	0.3651	7.2866	0.4662	0.9266	0.0814	0.6039	1.0666	0.2618	0.4903	0.0878	0.171	0.2275	1.3218	1.0993	2.0197	0.6317	0.0435	0.5609	1.0221	0.083
AC022395.1	0.341	0.3501	1.6312	1.6653	0.1195	0.1784	0.0283	1.6699	0.5174	0.6281	1.8079	0.1352	0.2232	0.1846	0.3007	0.4218	0.2055	0.1519	0.1773	0.1303	0.4205	0.2077	0.1202	0.4736	1.3786	0.3565	0.7437	0.3035	0.0519	0.3062	0.201	0.1955	0.2429	0.1281	0.6332	0.5312	0.1176	0.2056	0	0.1434	0.1193	0.3681	0.2264	0.1724	1.0713	0.1597	0.2389	0.2796	0.174
NCK1-DT	2.4149	0.5607	0.8869	0.9714	0.4285	2.8148	1.369	1.4669	0.5222	2.2594	0.7324	1.1072	1.8061	2.3826	1.5029	2.1247	0.925	1.3549	2.149	0.8231	3.0739	6.3437	2.2711	3.2266	1.1533	2.0676	1.8353	4.018	0.4902	2.4843	2.3067	1.446	4.0203	1.9438	2.5163	2.3556	3.4511	1.41	2.2927	1.6906	0.617	7.8026	1.0848	0.874	1.7739	1.6277	0.3888	3.3413	1.8792
ATP1B3-AS1	7.0912	0.7765	0.6958	14.1963	1.1929	3.2154	2.5092	2.1992	0.3188	3.5953	1.1718	1.1248	5.5687	14.6368	2.3537	7.5745	1.0128	4.633	5.113	2.7085	16.5802	11.1696	3.0459	5.8707	7.0074	1.3953	4.1242	2.6651	1.4395	6.5804	1.5926	1.8974	2.0201	9.1133	7.0224	2.7904	14.0227	3.7057	1.6581	4.1753	1.7005	23.0535	1.5977	1.0923	3.9964	1.771	0.4076	1.8086	2.1706
AL136018.1	0.0469	0	0.0395	0.1642	0	0.1473	7.472	0	0.0844	0.1784	0.0517	2.63	2.3514	42.5902	0.1168	0.2211	0.1005	0.209	8.8622	0.8603	0	5.9893	0	2.515	0.1265	0.0923	0.1445	0.3899	0.6859	8.7652	0.3162	0.0538	0.9803	1.5977	1.975	0.1846	41.6923	4.5837	6.7858	0.5131	0.075	14.8263	0.3172	0	0.4288	0	1.5376	0.1026	0
AC128709.3	0	0	0	0	0.7961	0.0743	1.0362	0	0	0.0675	0	0.0751	0	0.3074	0.0589	0.2007	0.9125	0.0632	0.6497	0.4338	0.0778	2.2824	0.5145	0	0.0638	0.0698	0	0	0.2306	5.1637	0	0	0.1348	0	0.1172	0	8.6184	5.7356	0.0766	0.418	0	0.7212	0.0685	0.082	0.1298	0	0.0612	0.0776	0.2173
AL592166.1	0.2324	0	0.0489	0	0.0651	1.2765	0.0771	0	0	0.4418	0.256	0.2457	0.3041	0.3522	0.241	0.657	0.8089	0.4658	0.2416	0.0444	1.2096	0.5094	0.9357	1.7465	0.8349	0.5144	0.5366	0.5515	0.0472	0.5738	2.6614	1.2656	0.5516	0.8144	1.1505	1.8286	0.0534	0.2102	0.2508	0.2932	0.7429	0.2951	0.3366	0.9395	0.7432	0.373	0.2504	0.8889	0.2964
AC011298.1	0.0131	0.0143	0.022	0.0153	0	1.3137	0.0868	0	0	0.0124	0	0.1521	0.0685	0	0.2605	0.1479	0	0.1631	0	0	0.0143	0.051	2.3909	0.1368	9.7041	0.0386	0.0805	0.1086	0	0.0117	0.0705	0.135	0.0869	0	0.0432	0	0	0	0	0	0.46	0.0266	7.8548	21.7411	0.1673	0.028	0.1466	1.9441	0
SNHG10	1.3731	0.3759	0.8111	0.915	0.385	0.6671	0.9219	0.8165	0.3013	1.1189	0.6393	0.7865	1.3632	1.1042	1.0309	1.7332	0.9981	1.6967	1.9244	0.6119	1.1645	0.6928	3.1201	2.0193	2.5478	1.2544	1.5267	1.6297	1.0221	1.3138	2.5442	2.1838	1.5445	0.6466	1.1467	2.2192	2.1801	0.6702	3.3341	1.1069	1.2805	1.6026	3.1569	2.6344	2.5994	0.8661	0.9091	2.2246	1.1175
AC092171.4	0.2813	0.847	1.0644	0.492	0.0789	1.3244	0.2799	0.7575	0.3161	1.6042	0.5422	0.9666	1.2095	0.4263	0.9336	0.3313	1.2051	0.9397	1.1115	0.2149	1.5413	0.6851	4.9267	2.8493	1.5791	0.5534	1.0825	0.7511	0.2284	0.6946	3.5057	0.8063	0.9348	0.9154	1.3926	1.5679	1.4874	0.5936	2.4282	1.242	2.2482	1.5716	3.259	2.1933	3.1487	0	0.6063	1.6909	0.5022
AL513318.1	0.2417	0.4537	1.6117	0.3221	0.7551	0.1084	0.1375	0.5242	0.1863	2.9706	0.5706	0	4.4675	5.5919	2.5357	10.9018	0.6843	0.0615	3.2605	0.5935	3.1788	18.9906	10.7757	29.8571	0.062	6.7601	0.0532	4.7947	5.6075	11.8449	40.247	6.0382	0.1148	2.1957	0	41.9156	5.8434	9.7019	17.5692	4.6469	2.5254	13.9087	0	6.4821	0.4891	0.5359	0.1786	8.0768	0.0352
H2AZ1-DT	0.1279	0.07	0.146	0.0213	0.0307	0.2867	0.0848	0.1342	0.0164	0.165	0.0503	0.0483	0.2323	0.0316	0.1289	0.0603	0.0783	0.0977	0.1064	0.0419	0.3404	0.2581	0.1986	1.0746	0.1559	0.0809	0.0656	0.1193	0.1038	0.0574	0.7262	0.3352	0.1301	0.2195	0.2638	0.647	0.0588	0.3194	0.2563	0.0615	0.0584	0.3155	0.1499	0.095	0.2838	0.0684	0.0788	0.2895	0.0839
AL022069.3	1.5139	1.0471	0.7563	1.1814	0.2936	0.5479	0.5891	0.8584	0.5117	2.056	0.627	0.662	0.8173	0.3155	0.8595	0.4077	0.378	0.1014	1.0417	0.3391	0.4242	1.1978	0.715	2.7527	0.3272	0.28	0.9346	0.3107	0.305	0.5827	2.6996	0.6135	0.6377	0.7067	0.6388	1.8215	0.335	0.5216	1.1301	0.4117	0.9008	0.4047	0.3957	0.5129	0.7178	0.8041	0.3043	0.7216	0.4646
AL391845.2	0.1292	0	0	0.0251	0.0483	0.6762	0.1429	0.0211	0.0387	0.1024	0	6.606	0.29	0.0373	0.6792	0.4669	0.1615	2.2262	0.0179	0.0494	0.1653	0.063	1.4919	0.0563	0.2322	0.6782	0.9506	0.9715	0.07	0.058	0.4064	0.0988	0.7364	0.2804	3.0398	0.0565	0.0991	0.052	0.1627	0.0906	57.2508	0.0875	1.5808	1.6424	0.0984	0.415	7.0581	0.9418	0.9231
RCCD1-AS1	0.3109	0.1048	0.2816	0.1395	0.1609	0.8009	0.2539	0.3748	0.086	0.4093	0.2108	0.3541	0.5903	0.3728	0.7343	0.248	0.4099	0.2983	0.2388	0.1827	0.6291	0.4195	0.3852	0.5628	0.4727	0.2353	0.5155	0.4826	0.2331	0.451	0.9669	0.6034	0.9766	0.2635	0.4934	0.5019	0.5939	0.375	0.7485	0.342	0.5927	0.6075	0.6467	0.5526	0.3716	0.4096	0.2269	0.5752	0.4637
LINC00460	0.0105	0	0.0088	0.0122	0.0118	0.3956	0.0557	0.0206	0.0094	0.0299	0.0694	3.6533	0.2513	0.1546	0.1917	3.2164	19.4144	0.0748	0.1048	0.016	1.3465	0.6138	1.6575	0.3294	1.264	1.4463	0.1185	1.2338	2.3704	0.0471	0.0283	1.2764	0	0.1893	0.1646	0.1102	0.3187	0.2406	1.2352	1.5722	0.1343	0.0427	0.3549	0.6187	0.1152	0.1461	0.2354	0.505	0.2143
LINC01146	0.0527	0.0262	0	0	0.0054	0.3407	0.0127	0.0188	0.0043	0.0137	0	0.0557	0.0716	0.0166	0.0477	0.0406	0.0308	1.1219	0.0239	0.0183	0.0682	0.4618	1.5425	0.0188	0.9033	0.5606	0.0246	0.1478	0.0117	0.1849	0.0258	0.0439	0	0	0.1185	0.0502	0.0308	0.0231	0.0775	0.0765	0.0153	0.0389	0.1803	0.1383	0.1575	0.3024	0.033	2.6849	0.2394
HDAC2-AS2	0.0551	0.0422	0.0556	0.0386	0.0618	1.0554	0.0439	0.0756	0.0099	0.0786	0.1275	0.2681	0.103	0.1098	0.0915	0.1247	0.4074	0.1571	0.321	0.0926	0.3564	0.7357	0.4128	0.2305	0.2129	0.1789	0.1697	0.1243	0.009	0.2673	0.7427	0.1327	0.1727	0.2594	0.1274	0.3976	0.3903	0.432	0.226	0.1437	0.1189	0.4367	0.1384	0.1464	0.1813	0.0649	0.1378	0.3615	0.09
LINC01206	0.0143	0.0067	0.0103	0.0048	0.4853	0.5127	0.0677	0.01	0.0092	0.0058	0.0045	0.3562	0.0275	0.8115	0.0119	0.0481	0.0262	0.0582	0.0493	0.5224	0.0112	0.7976	0.0082	0.0747	0.0587	0.0181	0.0084	0.0291	0.0332	0.1338	0.0138	0.0117	0.0097	0.3557	0.0657	0.407	0.1652	3.3726	0.4186	0.2009	0.0065	0.3463	0.0138	0.0047	0.0522	0.0197	0.037	0.0312	0.0229
AC132192.1	1.191	0.0815	0.6886	1.0417	0.5009	2.7261	0.7902	1.1664	0.5354	0.7076	0.902	0.4723	2.2268	1.6761	1.1736	2.245	0.3987	1.26	1.4863	0.6255	2.3659	3.1185	1.3189	3.1137	5.0152	1.4647	2.2919	3.9755	0.6649	0.7353	1.7052	1.0243	1.2016	0.4473	2.2114	2.3432	1.917	1.0772	0.964	1.6279	0.952	1.4368	0.4313	1.2039	1.8367	0.239	1.733	1.8714	2.5823
AL033530.1	0.0316	0	0.3724	0.0184	0.4966	0.2979	0.063	0.0155	0.0284	0	0	0.0502	0.3785	2.1229	0.0394	0.9092	0.2541	0	3.3024	0.1691	2.9639	5.6548	1.7067	5.6642	0.0142	0.4979	0	0	3.2617	5.0984	9.547	1.1606	0.2102	0.0158	0	5.891	2.3709	1.4875	0.7339	3.1127	0.7079	4.611	0.0305	0	0.0145	0	0.0682	3.44	0.0484
VCAN-AS1	0.4054	0	0.0852	0	0	0.053	0	0.0496	0.0456	0.0482	0.0558	0	0.4548	0.1316	0.1682	0.191	0	0.1354	0.0843	0	0.3887	0.0987	0.3265	1.3247	0.2731	0.1496	0.052	0.2406	0.0823	0.3185	0.3414	0.2905	0.1444	0.0507	0.1254	0.9969	2.7497	0.3055	0.0547	0	0	0.103	0.0979	0	0.0463	0.0542	0.1311	0.1662	0.3619
AC009533.3	0	0	0.1703	0	0	0.1272	0	0	0	0.077	0	0	0.0606	0.0702	0	0.1527	0.1302	0	0.1685	0	0.1332	0.2763	0	1.9063	0.1092	0.0399	0	0	0	0.1091	0.0546	0.0465	0.0769	0.284	0.0334	0.4782	0.0373	0.0977	0.3497	0.0681	0.1295	0.4527	0.0391	0.1404	0.074	0.2168	0.0699	0.3985	0
VPS9D1-AS1	1.5717	1.8044	2.9208	1.626	3.7525	5.5174	18.5679	2.5075	1.094	8.2899	2.3179	5.5223	5.2138	21.559	6.1214	30.2711	16.7545	10.5697	14.5312	5.248	30.0616	21.957	7.4314	24.7203	12.1607	16.1611	25.4971	10.5302	15.644	7.1709	12.0242	23.0231	11.1695	14.6731	5.6693	29.7923	11.2614	1.9871	32.7735	5.9917	7.0516	16.1476	28.9825	6.9115	3.8921	6.2405	13.3337	16.099	6.3628
AC002467.1	1.0112	0.3691	0.5103	0.4848	0.7686	0.5879	0.3429	0.4842	0.7577	0.4913	0.6189	0.8317	0.6975	0.866	0.4196	1.5143	0.6259	0.5205	1.1591	0.5236	0.8004	0.613	0.8144	1.175	0.4744	0.6522	0.715	0.5601	0.5657	1.5438	1.8775	3.5562	1.3017	0.8889	0.5471	1.9454	0.7647	0.8807	2.1826	1.3893	0.503	1.2557	1.2694	0.7788	1.3965	0.6254	0.5426	1.3633	0.3439
AL442638.1	0	0.2053	0	0.2187	0	0.7848	0.2488	0.5509	0.3372	0	0.6197	0	0	0	0	0	0	0	0.156	0	0	0.3654	0	0	0	0	0	0	0	0	0	0	0	0	0	0	0	0	0.2023	0	0	0.5715	0	0	0	0	0	0	0
AC145423.1	1.6734	1.0181	0.6255	0.8673	1.2511	4.6695	1.2336	1.0926	0.8358	0.5303	0.4097	2.5561	0.6953	1.7713	0.6172	1.7524	1.5934	1.9878	2.6298	1.1363	2.0378	0.9058	0.2995	4.861	3.6747	0.1829	1.5266	1.5447	3.0196	2.1707	10.2726	4.904	2.4719	1.4896	1.0741	4.6338	1.7101	2.2422	7.4242	2.1895	0.4459	2.0779	1.2568	0.6444	3.2286	0.199	0.481	5.6907	0.1897
AC048341.2	3.7107	1.8831	3.273	2.322	2.6389	4.6406	2.7622	4.7865	1.3833	2.9253	3.9882	2.2013	11.7103	3.7623	3.6049	2.2178	2.5207	6.1281	2.786	2.5581	19.442	4.409	8.8197	25.318	5.3661	2.3151	5.2018	14.2864	1.7638	3.3323	23.0503	9.4445	5.3286	8.3384	5.9005	12.3461	7.5751	4.6932	25.2968	5.1767	2.8938	7.4478	5.8554	4.9143	5.6244	9.2027	3.824	9.2993	7.3876
PARD3-AS1	1.03	0.3223	0.8663	0.858	1.8152	0.4619	0.9763	0.7206	0.1323	0.1399	0.8105	0.6224	0.3302	6.1169	0.4884	0.1387	0.1576	2.2286	9.5489	0.562	2.0965	2.0071	1.4221	1.7311	1.3219	0	0.9061	0.3493	0.5974	15.857	5.552	1.6874	0.5589	0.5894	0.9715	1.7371	5.5489	3.3715	2.3819	2.1041	0.2352	16.743	0.9946	4.0799	1.3448	0.1575	1.3957	1.2867	0.6006
AC023908.3	0.4521	0.1917	0.3802	0.3232	0.2453	1.1446	0.1548	0.5428	0.0393	0.5962	0.482	0.2622	1.0471	0.1768	0.7382	0.2474	0.5312	0.2339	0.4125	0.234	0.7033	0.54	0.8222	2.059	0.4455	0.7461	0.8382	0.9001	0.0947	1.0216	2.6138	0.786	0.9279	0.3505	0.4814	0.6313	0.8182	0.4397	0.5351	0.5398	0.3031	1.3483	0.7182	0.5055	1.1329	0.5776	0.2389	2.3594	0.9226
AC091607.2	0.5176	0.4858	0.2487	0.5174	0.0415	0.1934	0.1472	0.3259	0.1994	0.492	0.3258	0	0.1383	0.2241	0.2761	0.1045	0.0792	0.1976	0.123	0	0.2026	0.7564	0.1786	0.3383	0	0.2182	0.3794	0.1316	0.1201	0.166	0.2491	0.1696	0.2106	0.1111	0.7933	0.097	0.408	0.0446	0	0.1244	0.0887	0.3005	0.0357	0.0427	0.2703	0.1583	0.2869	0.2021	0.1132
AC010978.1	0.1026	0.0899	0.0863	0.0718	0.115	1.1593	0.0817	0.2411	0.1107	0.156	0.0678	0.0217	0.1381	0.0178	0.2554	0.2514	0.0659	0.4752	0.0341	0.2194	0.8095	0.6197	0.5287	0.8582	1.4007	0.2624	0.0632	0.3165	0.0333	0.1105	0.0829	0.0471	0.1169	0.3904	0.2201	0.6997	0.0755	0.099	0.2878	0.2243	0.2132	0.2084	0.0396	0.0948	0.7125	0.3953	0.1769	0.2691	0.2512
LINC00205	8.3289	1.2966	4.0223	4.6321	1.6875	1.8615	1.0758	3.1417	1.0803	5.2397	2.1461	5.07	9.8847	2.5105	4.6415	3.3258	2.7865	0.9665	5.0369	1.8134	2.1671	1.9946	3.9693	39.2727	4.0712	8.1139	6.8841	4.8664	1.1651	3.1112	13.6599	7.2837	5.4998	4.5033	7.1141	7.7574	4.4525	10.3325	6.7286	2.8553	5.3942	14.1679	2.4725	3.6589	4.8613	4.1015	1.4937	15.9895	4.5229
SPRY4-AS1	1.3102	0.0169	0.1037	0.3955	0.0173	1.0968	0.2045	0.0755	0.0139	0.1026	0.0509	0.1793	0.1383	0.0934	0.2302	0.276	0.3963	0.206	0.218	0.0824	0.0169	0.3304	0.8069	2.2567	0.6647	0.0758	0.4904	0.3293	0.025	0.2492	0.4777	0.053	0.2488	0.8335	0.4579	0.9705	0.1559	0.2602	0.2162	0.1945	0.3203	0.4228	0.1786	0.7479	0.2113	0.099	0.1994	0.2022	0.2359
LINC01415	0.5713	0.011	0.1096	0.187	0.0112	0.3041	0.0133	0.157	0.027	0.0191	0.0773	0.0212	0.4872	1.2933	0.1414	1.1052	0.2791	0.0625	1.2424	0.0766	2.2188	0.9472	0.0969	1.3625	0.1711	0.138	0.3806	0.1308	0.3662	0.846	2.1743	0.5517	0.0952	0.1706	0.1406	1.1831	2.9682	0.9669	0.3569	0.6744	0.1923	2.1178	0.0871	0.081	0.2198	0.2038	0.1642	2.4758	0.2966
AC138904.1	0.0358	0	0.3163	0	0.0803	0.4498	0.2139	0.0351	0	0.017	0.0592	1.288	0.2545	0.0155	0.1932	0.1013	1.439	0.016	1.8776	0.3421	0.6086	0.192	1.7455	7.0709	0.708	0.6344	0.0551	0.2551	0	1.0938	5.31	1.3967	1.1396	0.9686	0.0739	3.9234	0.2142	0.0864	0.1546	0.0753	0.3866	1.4739	1.055	0.7449	0.2292	0.0383	0.417	1.0377	0.0548
HOXD-AS2	0.2575	0	0.7579	0	0.0241	0	0.1993	0.042	0	0.0408	0	0.3177	0.1605	1.115	0.2315	2.2852	2.0457	0.0765	0.8747	0.1147	0.0941	2.676	4.9597	14.333	0.0578	0.6544	0.0661	0.0764	0.0348	2.5628	0.4626	2.313	0.1426	0.7951	0.1062	0.8725	1.4999	4.8388	0.9031	1.2634	0.1201	2.8775	0.0414	2.4046	0.1177	0.1378	0	2.5565	0.0876
RPL34-DT	0.1264	0.2449	0.6052	0.3742	0.0436	0.5189	0.0645	0.6666	0.4808	0.4437	0.2999	0.0103	0.0945	0.0253	0.0565	0.1191	0.0521	0.1126	0.089	0.0669	0.4583	0.3979	0.5873	0.8898	0.0524	0.1244	0.1597	0.0462	0.0237	0.0437	0.2359	0.0446	0.1754	0.0682	0.8346	0.4592	0.0358	0.0938	0.084	0.0981	0.1477	0.2964	0.1315	0.4044	0.08	0.1769	0.3438	0.7865	0.0198
SBNO1-AS1	0.554	0.91	1.2314	0.6922	0.5769	1.4492	0.5513	0.872	0.587	0.6019	0.9373	0.3138	0.7547	0.7711	0.8866	1.958	2.077	2.7322	1.07	0.4534	1.0626	0.6361	1.3066	1.4742	1.1731	0.7202	1.1575	0.728	0.5141	0.7818	9.0383	1.0437	1.1461	0.6935	0.6205	1.5052	0.7825	0.8828	2.3274	1.4978	0.7275	1.7488	1.5284	0.8686	1.7359	1.0165	1.4843	3.8712	0.7066
AL355304.1	0.1088	0.0149	0.1715	0.1268	0.0305	0.3272	0.0361	0.0932	0.0367	0.0517	0.0599	0.0863	0.3558	0.3885	0.1015	0.1025	0.0582	0.0848	0.2488	0.0208	0.1192	0.3841	0.2628	1.1728	0.1343	0.1739	0.1674	0.2097	0.1656	0.3052	0.861	0.4521	0.0904	0.1225	0.4151	1.3729	0.3626	0.377	1.0709	0.2744	0.0326	0.4696	0.0525	0.0628	0.1491	0.4365	0.0703	0.3418	0.2774
AL590064.1	2.572	3.1295	3.2446	4.1659	1.549	8.8216	3.4129	5.8775	2.184	12.5421	3.6205	5.9938	17.348	3.7124	9.4066	4.893	6.9899	7.2562	1.4662	1.2371	5.7422	3.7589	12.7736	9.2769	5.6479	18.65	4.6928	8.762	0.9282	4.4483	19.383	3.2771	12.5284	2.6233	7.5468	6.5597	8.0167	4.4227	1.5934	2.4038	12.6019	14.0326	8.9225	37.142	33.8214	8.3096	5.7087	27.0204	5.1514
RALY-AS1	0.3414	0.7382	1.7634	0.6687	0.6038	1.4886	0.5634	1.2818	0.7045	2.0016	0.9114	1.3517	2.1214	1.5694	2.1794	1.5883	1.0925	1.3025	1.2491	0.6487	0.854	1.352	1.9178	7.3584	1.9583	4.7156	2.3451	1.4131	0.6114	1.2422	8.3523	1.8271	2.548	0.7452	1.3908	0.9186	0.926	0.8129	2.4517	1.933	0.9657	2.7839	2.6291	3.4438	1.6362	0.9183	1.4834	4.7416	0.9022
LINC01572	0.1097	0.0465	0.1369	0.0867	0.2381	0.9849	0.0563	0.1213	0.0382	0.6256	0.1403	0.3031	0.3864	0.3555	0.4639	0.9004	0.2236	0.2963	0.421	0.1568	1.1944	1.441	0.4218	0.8927	1.227	0.4491	0.5266	0.7265	0.316	0.5306	1.13	0.8318	0.2083	0.1772	0.3066	0.7658	0.6183	0.5291	0.2138	0.6131	0.2687	0.8124	0.2973	0.3802	0.4721	0.1098	0.3112	1.0095	0.2816
SEMA3B-AS1	4.8646	28.939	22.9991	10.1194	0.5898	2.0636	0.6978	27.1687	19.5039	3.3746	11.8767	1.1123	1.9666	1.7079	4.9094	3.2217	4.0842	0.5857	1.6407	0.3013	1.8732	0.6405	6.2472	17.7018	1.7716	4.3979	4.8577	3.745	0.1068	0.4723	5.8465	3.3168	3.7454	0.79	3.7975	2.4143	2.6603	0.4756	2.2701	0.8847	5.3597	3.0721	4.3165	3.6453	3.2441	0.5629	0.6802	5.6047	1.6098
AC233992.3	0.1833	0.5017	1.0018	0.9617	1.233	1.3423	2.9179	1.2563	1.2357	6.0101	1.1103	0.4845	2.1929	1.1109	2.433	4.5769	3.7297	4.653	2.8967	0.42	2.5105	0.5356	0.2214	3.9525	5.1856	4.2368	4.7019	1.3049	1.7856	1.7279	4.1979	2.4166	6.7866	2.4774	4.6124	4.2063	1.5169	1.6574	1.0877	1.3102	6.7381	2.9787	2.3004	2.6463	4.2705	1.373	1.7381	2.4037	2.8981
AC090517.2	2.418	1.646	0.9893	1.8291	0.2931	1.436	1.3007	0.896	1.1163	0.8697	0.6479	2.7643	3.0303	0.9621	1.4099	2.3405	1.1901	3.668	1.1418	0.7488	1.4325	1.1461	2.5789	5.0401	4.1682	2.8289	2.1463	3.6454	0.9021	1.7606	6.6046	7.2691	2.5443	1.8979	1.1865	0.9429	1.0819	1.5762	4.0904	2.5286	2.3507	4.581	10.5384	3.2464	2.4487	1.259	2.7612	4.1431	1.6003
SALRNA1	0.0852	0.0933	0	0.0497	0	0.3344	0.1131	0.0835	0	0.0203	0.0235	0	0.239	0.2214	0.053	0.0602	0.3195	0	0.195	0	0	0.1868	0.223	0.1671	1.0143	0.021	0	0.3287	0.0346	0.0574	0.4306	0.513	0.3034	0.0427	0.2637	0.5309	0.3527	0.0257	0.4138	0.1254	0.0511	0.4545	0.288	0.2215	0.2726	0	0.2755	0.2561	0.2391
C5orf66	0.9088	0.1171	0.2866	0.4754	2.6454	0.8181	1.6936	0.4319	0.2223	0.4828	0.3975	1.5335	1.1645	1.3774	0.5212	0.6802	0.5583	0.5299	0.934	3.3641	0.9155	2.3895	0.9849	1.4588	1.3087	0.8349	0.5075	1.0072	0.5915	2.6164	0.5583	0.3831	0.8947	1.5793	0.8989	0.6311	0.9342	0.822	0.6923	1.0511	0.5929	1.2492	0.7743	1.1966	0.8183	0.2217	0.2939	0.6939	0.7296
AC092718.4	9.6201	4.4858	6.8379	6.6589	5.4289	17.4701	11.2827	4.6804	5.5243	14.4553	20.9222	30.5851	25.9942	24.1879	21.3218	22.8716	45.5414	37.6005	19.7249	7.2067	37.2765	48.0738	15.7952	42.8369	31.8362	16.975	51.7874	49.9423	16.8829	46.1491	21.243	35.2299	23.8104	24.1154	20.7436	48.0305	74.4377	29.4892	37.5749	28.8692	21.0846	28.6894	33.2618	15.8461	10.7769	15.6774	40.5657	40.1619	19.5678
LINC00491	0.0317	0	0.3064	0	1.599	0.5139	0	0.0776	0.0142	0	0.0349	0	0.0237	9.0417	0.0263	10.1981	1.0013	0.0141	3.9937	0.1694	5.5042	5.5259	0.0638	7.6624	0	8.7907	0	1.6546	8.2459	6.9001	9.8416	2.5071	3.6708	2.1894	0.0261	5.5275	0.0146	8.1769	2.5645	3.8778	3.2925	7.0174	0.3213	5.0149	0.3909	0	0.3005	11.0656	0
ZFAND2A-DT	1.8869	1.0651	1.2597	1.3384	1.2325	1.8217	2.4779	1.7146	0.7258	4.5952	0.975	6.8603	2.7351	3.0408	3.9385	3.6575	5.3551	0.26	5.5671	0.9733	2.7396	2.1132	4.1123	12.3833	2.0096	1.7511	4.1526	3.7978	0.8135	4.1662	12.0052	7.8295	4.8581	2.0941	5.8512	17.5029	2.5316	1.5834	7.2528	3.8041	1.5238	9.3376	8.1332	7.7306	3.911	2.7691	2.5495	10.9289	0.7641
AL033384.1	0.7574	0.0151	0.0695	0.1927	5.8375	0.7061	1.206	0.2158	0.0248	0.0655	0.1972	8.9269	0.3708	16.3865	0.08	1.7262	0.295	1.8526	2.6924	9.8991	1.464	4.1861	0.1331	0.648	0.0619	0.6097	0.0424	0.9479	2.0798	3.104	0.0557	0.6317	0.2877	5.8057	0.3523	0.3071	20.7211	14.8297	0.8619	2.9768	0	7.4708	0.7447	0.4295	0.0755	0.059	0.9499	0.0452	0.2248
AC106798.1	0.4824	0	0.3043	0.1406	0.8114	1.0095	0	0	0.0542	0.4012	0.465	0.8289	1.7136	3.3943	0.2502	8.1833	4.3275	1.1281	2.1069	0.1382	5.4189	4.641	0	1.8916	0	0.8305	0	0.5725	5.043	4.1152	1.3813	1.7977	0.1718	3.5625	1.1445	1.8981	5.1021	8.9437	1.822	1.4201	0.3856	17.397	0.4076	4.1795	0.1102	0.5163	0	0.0659	0.0615
TDRG1	0	0	0.0126	0	2.131	0	0	0	0.0135	0	0	0.0158	0	0.1425	0	0.0141	0.016	0	0	0.9373	0	0.0583	0.8074	0.0391	0.0134	0	0	0.0178	0.2673	0.1075	0.0605	0.0686	0	0.1349	0.0247	0.0393	0.2615	0	0	0	0.0239	0.152	0.0144	0.0173	0	0	0.0258	0.0164	0
SIAH2-AS1	0.1853	0.1791	0.1284	0.1144	0.1834	0.5134	0.2604	0.1281	0.049	0.3835	0.1081	0.2882	0.1468	0.4154	0.8052	1.0995	0.4204	0.3982	0.3175	0.1999	0.2868	0.5842	0.2546	0.2565	0.2057	0.547	0.47	0.3364	0.1682	0.4797	0.1175	0.3376	0.7765	0.3275	0.5758	0.3432	0.7019	0.6968	0.2353	0.2201	0.2353	2.8798	0.1369	0.1511	0.4982	0.1984	0.1974	0.1907	0.3448
AC087742.1	0.4804	0.0658	0	0.1401	0	0.377	0.0797	0.3529	0	0.2284	0.1323	0.1905	0.4042	0.5201	0.5481	0.1132	0	0.107	0.4496	0.0917	0.3291	0.5266	1.1607	1.6485	0	0.2954	0.3698	1.4967	0.0488	0.1079	3.075	0.4132	0.3992	0.0601	0.4956	0.7877	0.2762	0.0724	0.7777	0.3536	0.048	1.3422	0.2319	0.4163	0.1646	0.5785	0.1553	0.7877	0.3064
AC122719.3	0.0307	0.0839	0.0645	0.0179	0.0172	0.1764	0.1017	0.03	0.0276	0.0729	0.1689	0.0324	0.0573	0.1062	0.7759	0.2312	0.1149	0.0683	0.2423	0.0234	0.42	0.4481	1.4691	1.7633	0.7987	0.1961	0.1573	0.3457	0.0747	0.179	0.0413	0.7559	0.4658	0.1535	0.0759	0.3619	0.1269	0.1109	0.3639	0.1805	0.4534	0.8721	0.1184	0.1594	0.1261	0.0164	0.1983	0.3351	0.1095
LINC01150	0.4447	0.0375	0.0288	0.0798	0.0767	1.6467	0	0.335	0.0615	0.065	0.0377	0.0724	0.4094	0.3259	0.2271	0.0967	0.1099	0.3353	0.0569	0.1307	0.225	0.7999	0.3857	0.4472	0.1537	0.0673	0.2107	0.2842	0.1667	0.553	0.2305	0.5492	0.2599	0.1028	0.1976	0.5833	0.2203	0.4538	0.1477	0.4316	0.1094	0.2085	0.1321	0.3952	0.3126	0.476	0.0295	0.2991	0.3491
Z95115.1	2.2307	1.1016	1.4162	1.5812	0.8093	1.8307	1.509	1.3708	0.9831	1.3513	1.0601	1.1101	3.3039	1.5909	2.9399	3.4833	1.757	1.0132	4.2757	0.5847	1.9654	3.1748	1.1096	7.0897	2.9469	3.3349	2.6934	1.8688	1.03	4.2421	24.8133	5.5172	2.8243	1.9272	1.137	6.5115	2.1925	5.0372	3.9885	2.5569	1.1712	12.4197	6.3352	2.0212	1.9786	1.6619	2.4326	6.8367	1.7851
AC019205.1	2.2961	0.3027	0.658	0.7884	0.5961	1.7486	2.0199	0.6205	0.2332	0.0687	0.4684	0.643	1.3293	0.7107	1.1361	1.3505	0.0683	0.3561	1.2948	0.981	2.908	4.3458	1.6232	5.2137	0.1643	0.6317	0.8248	1.3272	1.9266	2.2414	2.693	1.7163	1.066	1.418	0.372	4.1272	1.6699	1.2717	1.0921	2.5286	0.6186	1.7668	0.3285	0.6239	0.3458	0.7464	0.352	2.4262	0.8243
MYHAS	0.0586	0	0.0164	0	0.0438	0.9611	0	0	0.0176	0	0.0215	0	0.0438	0.0338	0.0324	0.1842	0	0	0.065	0.0149	0.9638	0.6093	0.1102	0.6897	0	0.0192	0	0.0696	0.0476	0.1053	0.0263	0.1345	0	0.0978	0	0.4614	0.7729	0.0236	0.1898	0.263	0	0.0596	0.0189	0.0452	0.0357	0.0837	0.0169	0.0214	0
TNK2-AS1	0.2975	0.0171	0.1317	0.1826	0.2107	0.426	0.3532	0.2147	0.0141	0.0447	0.0345	0.1325	0.2459	0.5967	0.2339	0.3542	0.151	0.1535	0.1042	0.2751	0.635	0.5645	0.3531	0.348	0.2532	0.1078	0.0964	0.2602	0.356	0.9843	0.1688	0.0718	0.1636	0.2038	0.2584	0.2465	0.4465	1.3029	0.2366	0.4741	0.1502	2.6725	0.1058	0.2533	0.4436	1.4246	0.081	0.2396	0.2876
AC069503.1	0	0	0.0654	0.0907	0	0.5289	0.1548	0	0	0	0	0	0	0.5051	0.0968	0.3298	0	0	0.3235	0.0594	0.1278	0.1515	0.0313	0.1525	0	0	0	0	0.3157	0	0.4715	0.1338	0.0369	0.2336	0	0.306	0.3576	0.1875	0.042	0.6213	0	0.3555	0	0.4042	0.1066	0	0	0.2975	0
AC096667.1	0.1411	0.0281	0.0647	0.015	0.0144	0.161	0.034	0.1382	0	0.0122	0	0.0136	0.3261	0.0444	0.1703	0.0725	0.0412	0.1143	0.0107	0.0196	0.1406	0.3874	0.3305	0.0335	0.0576	0	0.0395	0.5023	0.0833	0.4492	0.0518	0.4118	0.0609	0.0128	0.0847	0.1514	0.059	0.0309	0.0277	0.3452	0.0513	0.1564	0.0619	0.1037	0.1172	0.8099	0.0664	0.5748	0.1439
LEF1-AS1	0.0439	0.032	0.0553	0.0341	0.0574	0.1606	0.0582	0.0644	0.0066	0.0347	0.0483	0.0232	0.1859	0.1709	0.1152	0.1653	0.0783	0.0651	0.3648	0.0335	0.0401	0.2848	0.3179	1.5955	0.0066	0.0072	0.09	0.0347	0.0593	0.21	0.0886	0.285	0.0694	0.5636	0.0965	1.9461	0.1143	0.3878	0.418	0.1107	0.0175	0.5643	0.0282	0.0253	0.1002	0.3442	0.0378	0.2876	0.2237
AC010761.4	0	0.1868	1.1477	0.4973	0.0957	0.6248	0.3395	1.7542	0.5368	1.0541	0.6577	0.6314	3.1258	0.5171	1.911	0.2412	0.3655	1.1399	0.3548	0.3258	2.4305	0.4986	1.5799	4.5713	1.3792	2.2657	3.1515	2.632	0.277	0.383	0.8046	0.3912	2.7538	0.5979	3.3787	2.1257	1.1767	0.5143	0.5523	0.3587	1.4999	0.7799	2.0591	2.6605	2.4164	0.3652	1.3974	1.8647	1.1314
NKILA	1.185	0.1854	0.6834	0.5725	0.1329	0.7263	0.0449	0.4145	0.1065	0.7564	0.373	1.0383	4.52	0.2199	0.9412	3.6059	4.189	0.2564	0.3803	0.1164	0.5752	0.5608	0.8589	7.1478	2.4333	1.0659	0.834	4.5609	0.3574	1.5355	4.7221	7.571	1.4307	1.441	2.5706	3.8859	1.4325	1.4291	1.5163	2.0078	0.4736	1.0663	2.7463	14.3943	1.2222	1.6307	1.0364	2.091	1.6409
AC069222.1	0.2777	0.0434	0.1112	0.1388	0.0593	0.4013	0	0.1554	0.0832	0.1383	0.1166	0.1399	0.178	0.0802	0.3622	0.1994	0.2833	0.4242	0.1761	0.0707	0.5073	0.4639	0.3089	0.9854	0.0238	0.0911	0.0543	0.2355	0.043	0.0475	0.9446	0.1062	0.3391	0.1324	0.0873	0.5204	0.0852	0.3668	0.4425	0.3004	0.0951	1.9752	0.1149	0.0764	0.4714	0.0425	0.057	1.1276	0.081
LINC00092	2.4652	1.4452	0.7476	2.8429	0.2569	0.4028	0.9485	1.1847	0.5109	0.2701	0.4644	0.0678	0.3496	1.3334	0.7833	0.1209	0.1374	0.0653	5.8785	0.133	0.2812	0.4197	0.4281	1.7969	0.0494	0.0902	0.047	0.3807	0	0.6419	0.1976	0.2522	0.0609	0.312	0.0832	0.8174	0.9946	0.0332	0.1088	0.131	0.0293	1.2104	0.0354	0.1694	0.3434	0.5591	0.079	0.3206	0.0374
AC006252.1	0.5247	0	0.1358	0.0471	0	1.3515	0.2678	0.3953	0.0363	0.6907	0.1779	0.8537	0.6641	0.3845	0.3349	1.2934	1.5132	0.3956	0.9738	0.2158	0.6193	0.6685	1.7228	1.2135	0.5801	1.6678	0.4557	0.479	0.1966	1.0511	3.4265	0.6943	1.6481	0.2425	1.1325	0.7941	0.4826	0.2434	0.5662	0.7469	0.5807	1.2301	2.1436	0.8393	1.1435	1.944	0.348	2.0736	0.6589
AL133243.2	7.1825	2.1015	3.5506	4.5078	1.6294	5.4504	1.928	4.1078	1.9718	3.831	2.2046	5.943	3.7521	3.9412	3.9582	5.0383	2.4374	7.0341	7.9827	3.0157	6.1894	16.8272	5.4092	18.957	7.462	4.3423	2.5041	5.824	1.3134	8.0503	21.5368	9.1795	5.2065	6.177	8.5517	14.3113	12.5062	9.7195	10.3546	4.5657	1.8845	23.4505	4.4208	5.7641	4.5597	2.9636	4.6331	23.1634	3.0769
AC063948.1	0.5863	1.1556	0.5917	0.4102	0	1.1042	0	0.4593	0.3163	0.4459	0.2583	1.2399	0.7892	1.6247	0.4865	1.1051	0.8792	1.2535	1.6583	0.4479	0.514	1.3709	1.1332	1.686	1.0533	1.2689	1.9254	0.6958	0.1904	1.6847	6.636	2.0168	1.0021	0.3523	0.7741	1.2303	1.1863	0.5656	2.9103	1.0849	0.1874	1.3103	1.2454	1.8964	1.5002	0.502	1.1121	1.6661	0.8374
FAM167A-AS1	0.02	1.6607	1.2754	0.512	0	1.3572	0	0.8794	1.2379	0.019	0.7914	0	0	0.0346	0.2153	0.1505	0.0214	0.0356	1.0459	0.0152	0.4155	0.4666	0.6428	0.0522	0	0.0196	0.0614	0.0474	0	0.2509	0	0.0229	0.0379	0.02	0.0659	0.0785	0.0184	0.0722	0.0215	0	0	0.2433	0	0.0692	0.0182	0	0.0344	0	0.0814
AC010761.1	2.9659	0.5954	1.1225	2.1905	0.8315	2.431	2.886	1.4039	0.3555	2.2086	1.9604	1.725	5.5824	4.2809	8.3267	1.4908	3.177	4.7122	2.4264	1.2461	9.4266	2.9378	4.4189	6.0739	5.8615	5.9817	6.5445	3.9893	1.7259	3.0185	6.7942	3.0042	3.5205	2.5741	3.345	6.354	2.3641	2.9209	6.8281	3.2015	5.2946	5.4236	2.3866	3.3122	3.117	1.7988	2.6426	9.2934	4.6905
AF241728.2	0.545	0.0796	0.0306	0.0847	0.0815	0.038	0.1446	0.2135	0.0327	0.2763	0.04	0.0768	0.1087	0.4406	0.1809	0.2397	0.3503	0.0971	0.393	0.1388	0.5974	1.1683	1.112	0.2375	0.5549	0.572	0.261	0.1294	0.177	0.62	1.4689	0.4167	0.138	0.2911	0.4198	0.6196	0.7352	0.6135	0.549	0.7335	0.1162	2.3256	0.1403	0.2938	0.1992	0.1167	0.094	0.7149	0.2595
AC092718.3	0.5036	0.1379	0.2588	0.1794	0.1569	0.4098	0.1299	0.2192	0.0377	0.3324	0.2003	0.281	0.9206	0.2665	0.3482	0.3559	0.2098	0.162	0.3957	0.1816	0.5826	0.5315	0.6196	3.0352	0.5278	0.3027	0.2297	0.6806	0.2499	0.2889	0.7351	0.3529	0.3453	0.9805	0.6349	2.4034	0.4503	0.4217	0.3472	0.2471	0.3578	1.1368	0.3242	1.212	0.4218	0.1647	0.5427	0.6422	0.4139
AC138904.3	0	0.0182	0.0697	0	0.0186	0.2428	0.022	0.0162	0	0	0.0183	0.0701	0.0124	0	0.0138	0.0312	0.2841	0	0.2482	0.0127	0.1272	0.0646	0.3337	1.0184	0.1489	0.0652	0.034	0.059	0	0.3126	0.7147	0.1901	0.1102	0.1328	0.0547	0.4566	0.0457	0	0.0537	0.0139	0.053	0.3368	0.016	0.2106	0.0454	0.0355	0.0572	0.1993	0.0169
AC060780.1	5.2355	2.1161	4.3606	3.4805	1.282	11.682	1.3961	4.3001	1.8556	9.8339	3.1931	5.6916	7.2221	5.038	12.685	2.8081	1.8261	15.9536	3.2489	1.4452	5.4276	3.6323	8.4329	17.7012	13.7916	4.9269	6.2611	7.3604	0.7681	4.3745	8.4114	5.7253	6.9795	3.2623	7.1216	9.5211	4.499	6.3075	5.7428	3.3826	31.8782	14.0296	5.0555	4.4647	13.5588	3.4272	8.3528	26.966	4.4232
AL360093.1	0.1579	0	0.166	0.092	0.5754	0.3304	0	0.116	0	0.4127	0.087	0.1252	0.3542	0.4101	0.3602	0.2976	0.1268	0.1406	0.788	0.3618	0.6056	1.1536	0.6357	0.4643	0.8863	0.233	0.3645	0.0468	0.1923	0.4607	1.0104	0.4526	0.1499	0.4743	0.9119	0.0518	0.6534	0.7615	0.1278	0.332	0.4101	0.6014	0.1905	0.3192	0.4328	0	0.2042	0.4314	0.0805
[truncated: 123 more columns]
